# Supplementary material for: Ruthenium(ii)-catalyzed selective C–H difluoroalkylation of aniline derivatives with pyrimidyl auxiliaries
Source: Royal Society of Chemistry journal article supplement (doi:10.1039/c8cc05067h), 2018-01-01
Supplement: c8cc05067h1.pdf [file c8cc05067h1.pdf]

## Supporting Information

### Ruthenium(II)-catalyzed Selective C-H Difluoroalkylation of Aniline Derivatives with Pyrimidyl Auxiliaries

Xin-Gang Wang,<sup>a</sup> Yuke Li,<sup>b</sup> Lu-Lu Zhang,<sup>a</sup> Bo-Sheng Zhang,<sup>a</sup> Qiang Wang,<sup>a</sup> Jun-Wei Ma,<sup>a</sup> and Yong-Min Liang<sup>\*a</sup>

<sup>a</sup> State Key Laboratory of Applied Organic Chemistry, Lanzhou University, Lanzhou 730000, P.R. China

<sup>b</sup> Department of Chemistry and Centre for Scientific Modeling and Computation, Chinese University of Hong Kong, Shatin, Hong Kong, China.

E-mail: liangym@lzu.edu.cn

## Table of Contents

|                                                                                                 |    |
|-------------------------------------------------------------------------------------------------|----|
| 1. General Remarks.....                                                                         | 3  |
| 2. Optimization Studies.....                                                                    | 4  |
| 2. General Procedure for Ruthenium(II)-Catalyzed site-selective Difluoromethylation.....        | 6  |
| 3. Difluoromethylated aniline derivatives diversified transformations.....                      | 11 |
| (a) Cyclization (synthesis of difluoromethyl modified imidazo[1,2- <i>a</i> ]pyrimidine 6)..... | 11 |
| (b) Hydrolysis (procedure of hydrolysis of ethyl ester 7).....                                  | 11 |
| 4. Mechanistic Studies.....                                                                     | 12 |
| (a) H/D Scrambling.....                                                                         | 12 |
| (b) Reversible H/D exchange.....                                                                | 15 |
| (c) Radical mechanism experiment.....                                                           | 17 |
| (d) Control experiment.....                                                                     | 17 |
| 5. Proposed mechanism.....                                                                      | 18 |
| 6. Computational Data.....                                                                      | 19 |
| a) Computational Methods.....                                                                   | 19 |
| b) Results.....                                                                                 | 19 |
| c) Results Optimized Cartesian coordinates at B <sub>3</sub> LYP/6-31G level of theory.....     | 21 |
| 7. Crystallographic Details.....                                                                | 53 |
| 8. NMR spectra.....                                                                             | 54 |
| References.....                                                                                 | 92 |

## 1. General Remarks

Catalytic reactions were performed under Ar atmosphere using pre-dried glassware and standard Schlenk techniques. 1,4-Dioxane and toluene were dried with CaH<sub>2</sub> and freshly distilled, DCE was dried with P<sub>2</sub>O<sub>5</sub> and freshly distilled. The substrates **1**,<sup>1</sup> bromodifluoroamides **2z**, **2aa**,<sup>2</sup> **13**,<sup>3</sup> [Ru(O<sub>2</sub>CMe)<sub>2</sub>(*p*-cymene)],<sup>4</sup> and [Ru(OAc)<sub>2</sub>(*p*-cymene)]<sup>5</sup> were synthesized according to previously described methods. Other chemicals were obtained from commercial sources and were used without further purification. For Column chromatography, 200-300 mesh silica gel and preparative TLC (PTLC) was employed. Analytical TLC was performed with silica gel GF254 plates. <sup>1</sup>H NMR (400 MHz), <sup>13</sup>C NMR (100 MHz) and <sup>19</sup>F NMR (376 MHz) were recorded in CDCl<sub>3</sub> using TMS as internal standard. All products were further characterized by high resolution mass spectra (HRMS, FTMS, ESI full ms [100-2000]), copies of their <sup>1</sup>H NMR, <sup>13</sup>C NMR and <sup>19</sup>F NMR spectra were provided. If not otherwise specified, chemical shifts (δ) are given in ppm.

## 2. Optimization Studies

**Table S1.** Testing of Bases, Solvents and Temperature.<sup>a</sup>

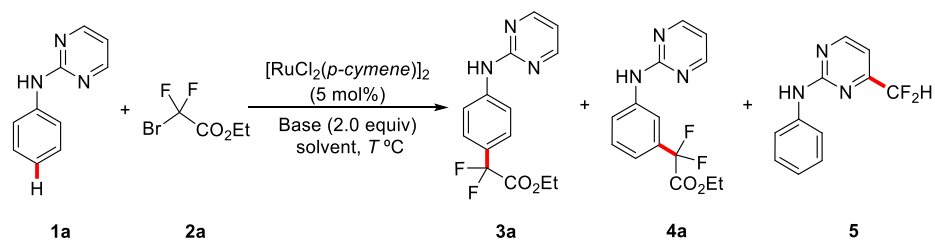

| Entry | Base                     | $T$ [°C] | Solvent          | Yield [%]       |                 |                 |
|-------|--------------------------|----------|------------------|-----------------|-----------------|-----------------|
|       |                          |          |                  | <b>3a</b>       | <b>4a</b>       | <b>5</b>        |
| 1     | $\text{K}_2\text{CO}_3$  | 120      | 1,4-dioxane      | -               | -               | -               |
| 2     | $\text{K}_2\text{CO}_3$  | 120      | DCE              | <5              | -               | -               |
| 3     | $\text{K}_2\text{CO}_3$  | 120      | TCE              | -               | -               | -               |
| 4     | $\text{K}_2\text{CO}_3$  | 120      | TBME             | 16              | -               | -               |
| 5     | $\text{K}_2\text{CO}_3$  | 120      | DME              | -               | -               | -               |
| 6     | $\text{K}_2\text{CO}_3$  | 120      | MeCN             | -               | -               | 67 <sup>b</sup> |
| 7     | $\text{K}_2\text{CO}_3$  | 120      | <b>toluene</b>   | <b>39</b>       | -               | -               |
| 8     | $\text{K}_2\text{CO}_3$  | 120      | $\text{PhCF}_3$  | 28              | -               | -               |
| 9     | $\text{K}_2\text{CO}_3$  | 120      | <i>o</i> -xylene | 30              | -               | -               |
| 10    | $\text{K}_2\text{CO}_3$  | 120      | <i>m</i> -xylene | 27              | -               | -               |
| 11    | $\text{K}_2\text{CO}_3$  | 120      | <i>p</i> -xylene | 26              | -               | -               |
| 12    | $\text{K}_2\text{CO}_3$  | 120      | Mesitylene       | 21              | -               | -               |
| 13    | $\text{K}_2\text{CO}_3$  | 100      | toluene          | -               | -               | -               |
| 14    | $\text{K}_2\text{CO}_3$  | 140      | toluene          | 35              | 13              | -               |
| 15    | $\text{K}_2\text{CO}_3$  | 120      | toluene          | -               | -               | -               |
| 16    | $\text{Na}_2\text{CO}_3$ | 120      | <b>toluene</b>   | <b>41</b>       | <b>8</b>        | -               |
| 17    | $\text{Cs}_2\text{CO}_3$ | 120      | toluene          | 29 <sup>b</sup> | -               | -               |
| 18    | $\text{K}_3\text{PO}_4$  | 120      | toluene          | -               | -               | -               |
| 19    | NaOAc                    | 120      | toluene          | 13 <sup>b</sup> | 11 <sup>b</sup> | -               |
| 20    | KOAc                     | 120      | toluene          | 21 <sup>b</sup> | 18 <sup>b</sup> | -               |
| 21    | CsOAc                    | 120      | toluene          | 15 <sup>b</sup> | 13 <sup>b</sup> | -               |
| 22    | TMEDA                    | -        | toluene          | -               | -               | -               |

<sup>a</sup>Standard reaction conditions: aniline derivative (0.2 mmol), bromodifluoroacetate (0.6 mmol),  $[\text{RuCl}_2(p\text{-cymene})]_2$  (0.01 mmol), base (0.4 mmol), and solvent (1 mL) under argon atmosphere, yields of isolated products. <sup>b</sup>Yield was determined by GC-MS spectroscopy using diphenyl oxide as the internal standard. DCE = 1,2-dichloromethane, TCE = 1,1,2-trichloromethane, DME = 1,2-dimethoxyethane. TMEDA = *N,N'*-tetramethylethylenediamine

**Table S2.** Optimization of Ruthenium(II)-Catalyzed C–H Difluoromethylation.<sup>a</sup>

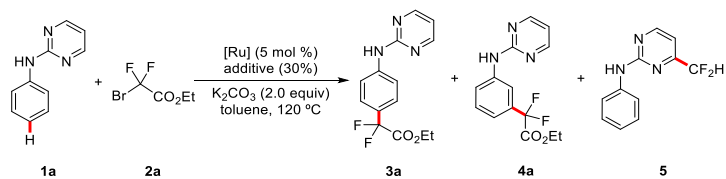

| Entry           | Catalyst                                                   | Additive                                 | Yield [%]            |                  |                 |
|-----------------|------------------------------------------------------------|------------------------------------------|----------------------|------------------|-----------------|
|                 |                                                            |                                          | 3a                   | 4a               | 5               |
| 1               | [RuCl <sub>2</sub> ( <i>p</i> -cymene)] <sub>2</sub>       | NaOAc                                    | 25                   | 13 <sup>b</sup>  | -               |
| 2               | [RuCl <sub>2</sub> ( <i>p</i> -cymene)] <sub>2</sub>       | KOAc                                     | 28                   | 19 <sup>bl</sup> | -               |
| 3               | [RuCl <sub>2</sub> ( <i>p</i> -cymene)] <sub>2</sub>       | Piv-OH                                   | 22 <sup>b</sup>      | 31 <sup>b</sup>  | -               |
| 4               | [RuCl <sub>2</sub> ( <i>p</i> -cymene)] <sub>2</sub>       | <i>t</i> -AdCOOH                         | 18 <sup>b</sup>      | 34 <sup>b</sup>  | -               |
| 5               | [RuCl <sub>2</sub> ( <i>p</i> -cymene)] <sub>2</sub>       | MesCO <sub>2</sub> H                     | 25 <sup>b</sup> (23) | 40 <sup>b</sup>  | -               |
| 6               | [RuCl <sub>2</sub> ( <i>p</i> -cymene)] <sub>2</sub>       | <i>N</i> -Ac-L-Val                       | 28 <sup>b</sup>      | 35 <sup>b</sup>  | -               |
| 7               | [RuCl <sub>2</sub> ( <i>p</i> -cymene)] <sub>2</sub>       | <i>N</i> -Ac-L-Phe                       | 24 <sup>b</sup>      | 38 <sup>b</sup>  | -               |
| 8               | [RuCl <sub>2</sub> ( <i>p</i> -cymene)] <sub>2</sub>       | <i>N</i> -Ac-L-Ile                       | 27 <sup>b</sup>      | 41 <sup>b</sup>  | -               |
| 9               | [RuCl <sub>2</sub> ( <i>p</i> -cymene)] <sub>2</sub>       | <i>N</i> -Ac-L-Gly                       | 25 <sup>b</sup>      | 36 <sup>b</sup>  | -               |
| 10              | [RuCl <sub>2</sub> ( <i>p</i> -cymene)] <sub>2</sub>       | <i>N</i> -Ac-L-Cys                       | 18 <sup>b</sup>      | 38 <sup>b</sup>  | -               |
| 11              | [RuCl <sub>2</sub> ( <i>p</i> -cymene)] <sub>2</sub>       | <i>N</i> -Piv-Val                        | 25 <sup>b</sup>      | 39 <sup>b</sup>  | -               |
| 12              | [RuCl <sub>2</sub> ( <i>p</i> -cymene)] <sub>2</sub>       | <i>N</i> -Piv-Leu                        | 21 <sup>b</sup>      | 33 <sup>b</sup>  | -               |
| 13              | [RuCl <sub>2</sub> ( <i>p</i> -cymene)] <sub>2</sub>       | PPh <sub>3</sub>                         | -                    | -                | 78              |
| 14              | [RuCl <sub>2</sub> ( <i>p</i> -cymene)] <sub>2</sub>       | AgNTf <sub>2</sub>                       | 28 <sup>b</sup>      | 8 <sup>b</sup>   | -               |
| 15              | [RuCl <sub>2</sub> ( <i>p</i> -cymene)] <sub>2</sub>       | AgBH <sub>4</sub>                        | 27 <sup>b</sup>      | 7 <sup>b</sup>   | -               |
| 16              | [RuCl <sub>2</sub> ( <i>p</i> -cymene)] <sub>2</sub>       | AgSbF <sub>6</sub>                       | 30 <sup>b</sup>      | -                | -               |
| 17              | [RuCl <sub>2</sub> ( <i>p</i> -cymene)] <sub>2</sub>       | AgNO <sub>3</sub>                        | 36 <sup>b</sup>      | 9 <sup>b</sup>   | -               |
| 18              | [RuCl <sub>2</sub> ( <i>p</i> -cymene)] <sub>2</sub>       | AgOAc                                    | 29 <sup>b</sup>      | 21 <sup>b</sup>  | -               |
| 19              | [RuCl <sub>2</sub> ( <i>p</i> -cymene)] <sub>2</sub>       | AgTFA                                    | 19 <sup>b</sup>      | 14 <sup>b</sup>  | -               |
| 20              | [RuCl <sub>2</sub> ( <i>p</i> -cymene)] <sub>2</sub>       | Ag <sub>2</sub> CO <sub>3</sub>          | 35 <sup>b</sup>      | <5               | -               |
| 21              | [RuCl <sub>2</sub> ( <i>p</i> -cymene)] <sub>2</sub>       | AgNTf <sub>2</sub> + <i>N</i> -Ac-L-Ile  | 20 <sup>b</sup>      | 46 <sup>b</sup>  | -               |
| 22              | [RuCl <sub>2</sub> ( <i>p</i> -cymene)] <sub>2</sub>       | AgNTf <sub>2</sub> +MesCO <sub>2</sub> H | 14 <sup>b</sup>      | 54 <sup>b</sup>  | -               |
| 23              | [RuCl <sub>2</sub> ( <i>p</i> -cymene)] <sub>2</sub>       | AgNTf <sub>2</sub> + <i>N</i> -Piv-Val   | 33 <sup>b</sup>      | 26 <sup>b</sup>  | -               |
| 24              | Ru <sub>3</sub> (CO) <sub>12</sub>                         | -                                        | -                    | -                | -               |
| 25              | RuCl <sub>2</sub> (PPh <sub>3</sub> ) <sub>3</sub>         | -                                        | -                    | -                | 59 <sup>b</sup> |
| 26              | RuCl <sub>2</sub> (COD)                                    | -                                        | -                    | -                | -               |
| 27              | [Ru(OAc) <sub>2</sub> ( <i>p</i> -cymene)]                 | -                                        | 27                   | <5               | -               |
| 28              | [Ru(O <sub>2</sub> CMes) <sub>2</sub> ( <i>p</i> -cymene)] | -                                        | 58                   | <5               | -               |
| 29 <sup>c</sup> | [Ru(O <sub>2</sub> CMes) <sub>2</sub> ( <i>p</i> -cymene)] | -                                        | 65                   | 15               | -               |
| 30              | [Ru(O <sub>2</sub> CMes) <sub>2</sub> ( <i>p</i> -cymene)] | MesCO <sub>2</sub> H                     | 34 <sup>b</sup>      | 30 <sup>b</sup>  | -               |
| 31              | [Ru(O <sub>2</sub> CMes) <sub>2</sub> ( <i>p</i> -cymene)] | <i>N</i> -Ac-L-Ile                       | 25 <sup>b</sup>      | 39 <sup>b</sup>  | -               |

<sup>a</sup> Standard reaction conditions: aniline derivative (0.2 mmol), bromodifluoroacetate (0.6 mmol), [Ru(O<sub>2</sub>CMes)<sub>2</sub>(*p*-cymene)] (0.02 mmol), base (0.4 mmol), and solvent (1 mL) under argon atmosphere, yields of isolated products. <sup>b</sup> GC yield. <sup>c</sup> Na<sub>2</sub>CO<sub>3</sub> (0.4 mmol) was used. MesCO<sub>2</sub>H = 2,4,6-trimethylbenzoic acid.

## Scheme S1. Optimization of auxiliary

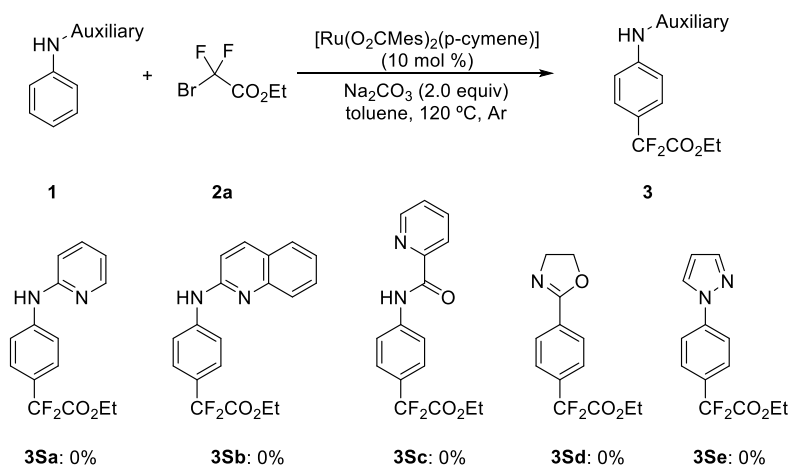

No better results were achieved by changing other *N*-substituted auxiliaries.

## 2. General Procedure for Ruthenium(II)-Catalyzed site-selective Difluoromethylation

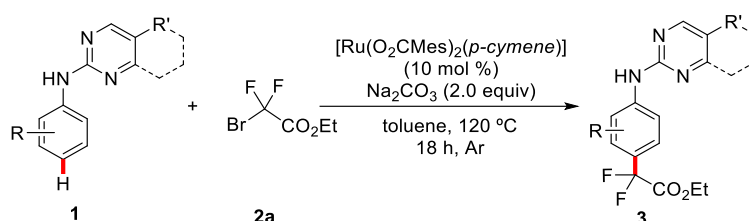

**General Procedure** : A mixture of **1** (0.2 mmol, 1.0 equiv.),  $\text{BrCF}_2\text{CO}_2\text{Et}$  (80  $\mu\text{L}$ , 121.8 mg, 3 equiv.),  $[\text{Ru}(\text{O}_2\text{CMes})_2(\text{p-cymene})]$  (5.6 mg, 10 mol %),  $\text{Na}_2\text{CO}_3$  (42.4 mg, 2 equiv.), and toluene (1 mL) in a 10 mL glass tube sealed under argon atmosphere was heated at 120  $^\circ\text{C}$  for 18 hours. The reaction mixture cooled to room temperature and concentrated in *vacuo*. The resulting residue was purified by column chromatography (PE/EA) on silica gel to give the product **3** or **4**.

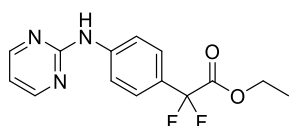

### ethyl 2,2-difluoro-2-(4-(pyrimidin-2-ylamino)phenyl)acetate (**3a**)

amorphous yellow solid, 65% (38 mg), M.p. (from  $\text{CHCl}_3$ ): 56–62  $^\circ\text{C}$ .

$^1\text{H NMR}$  (400 MHz, Chloroform-*d*)  $\delta$  8.46 (d,  $J = 4.7$  Hz, 2H), 7.74 (d,  $J = 8.5$  Hz, 2H), 7.62 (s, 1H), 7.57 (d,  $J = 8.8$  Hz, 2H), 6.80 (t,  $J = 4.7$  Hz, 1H), 4.30 (q,  $J = 7.1$  Hz, 2H), 1.31 (t,  $J = 7.1$  Hz, 3H).

$^{13}\text{C NMR}$  (101 MHz, Chloroform-*d*)  $\delta$  164.37 (t,  $J = 35.9$  Hz), 158.00, 141.96, 128.93, 126.40 (t,  $J = 6.1$  Hz), 126.23, 118.63, 113.48 (t,  $J = 251.7$  Hz), 113.28, 63.01, 13.88.

$^{19}\text{F NMR}$  (376 MHz, Chloroform-*d*)  $\delta$  -103.0.

**HRMS(ESI)** Calcd for  $\text{C}_{14}\text{H}_{13}\text{F}_2\text{N}_3\text{O}_2$  [ $\text{M}+\text{H}^+$ ]: 294.1049, found: 294.1042.

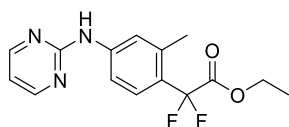

### ethyl 2,2-difluoro-2-(2-methyl-4-(pyrimidin-2-ylamino)phenyl)acetate (**3b**)

amorphous yellow solid, 68% (41.7 mg), M.p. (from  $\text{CHCl}_3$ ): 70–74  $^\circ\text{C}$ .

$^1\text{H NMR}$  (400 MHz, Chloroform-*d*)  $\delta$  8.47 (d,  $J = 4.8$  Hz, 2H), 7.62 – 7.51 (m, 3H), 7.50 (s, 1H), 6.80 (t,  $J = 4.8$  Hz, 1H), 4.31 (q,  $J = 7.2$  Hz, 2H), 2.44 (s, 3H), 1.31 (t,  $J = 7.1$  Hz, 3H).

$^{13}\text{C NMR}$  (101 MHz, Chloroform-*d*)  $\delta$  164.3 (t,  $J = 35.6$  Hz), 159.8, 158.0, 141.6, 137.5 (t,  $J = 3.0$  Hz), 127.2 (t,  $J = 8.8$  Hz), 124.7 (t,  $J = 23.8$  Hz), 121.6, 116.0, 114.3 (t,  $J = 249.5$  Hz), 113.1, 63.0, 19.9 (t,  $J = 2.6$  Hz), 13.9.

$^{19}\text{F NMR}$  (376 MHz, Chloroform-*d*)  $\delta$  -100.4.

**HRMS(ESI)** Calcd for  $\text{C}_{15}\text{H}_{15}\text{F}_2\text{N}_3\text{O}_2$  [ $\text{M}+\text{H}^+$ ]: 308.1205, found: 308.1202.

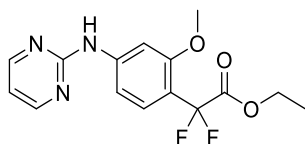

**ethyl 2,2-difluoro-2-(2-methoxy-4-(pyrimidin-2-ylamino)phenyl)acetate (3c)**

amorphous yellow solid, 52% (33.5 mg), M.p. (from CHCl<sub>3</sub>): 86-90 °C.

<sup>1</sup>H NMR (400 MHz, Chloroform-*d*) δ 8.47 (d, *J* = 4.8 Hz, 2H), 7.84 (s, 1H), 7.67 (s, 1H), 7.56 (d, *J* = 8.4 Hz, 1H), 7.09 (dd, *J* = 8.5, 2.0 Hz, 1H), 6.80 (t, *J* = 4.8 Hz, 1H), 4.33 (q, *J* = 7.1 Hz, 2H), 3.84 (s, 3H), 1.31 (t, *J* = 7.1 Hz, 3H).

<sup>13</sup>C NMR (101 MHz, Chloroform-*d*) δ 164.3 (t, *J* = 34.5 Hz), 159.8, 158.0, 157.5, 143.5, 126.9 (t, *J* = 7.3 Hz), 115.5 (t, *J* = 24.7 Hz), 113.3, 112.5 (t, *J* = 247.5 Hz), 110.4, 102.1, 62.6, 55.7, 14.0.

<sup>19</sup>F NMR (376 MHz, Chloroform-*d*) δ -101.51.

HRMS(ESI) Calcd for C<sub>15</sub>H<sub>15</sub>F<sub>2</sub>N<sub>3</sub>O<sub>3</sub> [M+H<sup>+</sup>]: 324.1154, found: 324.1158.

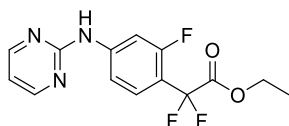

**ethyl 2,2-difluoro-2-(2-fluoro-4-(pyrimidin-2-ylamino)phenyl)acetate (3d)**

yellow solid, 39% (24.3 mg), M.p. (from CHCl<sub>3</sub>): 130-136 °C.

<sup>1</sup>H NMR (400 MHz, Chloroform-*d*) δ 8.50 (d, *J* = 4.8 Hz, 2H), 7.94 (d, *J* = 13.5 Hz, 1H), 7.81 (s, 1H), 7.55 (t, *J* = 8.4 Hz, 1H), 7.23 (d, *J* = 8.4 Hz, 1H), 6.86 (t, *J* = 4.8 Hz, 1H), 4.36 (q, *J* = 7.1 Hz, 2H), 1.33 (t, *J* = 7.1 Hz, 3H).

<sup>13</sup>C NMR (101 MHz, Chloroform-*d*) δ 163.6 (t, *J* = 34.6 Hz), 161.6 (t, *J* = 4.8 Hz), 159.4, 159.1 (t, *J* = 4.7 Hz), 158.1, 144.0 (d, *J* = 11.5 Hz), 127.4 (td, *J* = 6.8, 3.8 Hz), 113.9, 113.8 (d, *J* = 2.9 Hz), 111.8 (t, *J* = 250.3 Hz), 106.2 (d, *J* = 26.7 Hz), 63.3, 13.9.

<sup>19</sup>F NMR (376 MHz, Chloroform-*d*) δ -101.0 (d, *J* = 7.8 Hz), -112.7 (t, *J* = 7.6 Hz).

HRMS(ESI) Calcd for C<sub>14</sub>H<sub>12</sub>F<sub>3</sub>N<sub>3</sub>O<sub>2</sub> [M+H<sup>+</sup>]: 312.0954, found: 312.0947.

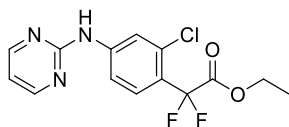

**ethyl 2-(2-chloro-4-(pyrimidin-2-ylamino)phenyl)-2,2-difluoroacetate (3e)**

amorphous yellow oil, 45% (29.4 mg), M.p. (from CHCl<sub>3</sub>): 68-74 °C.

<sup>1</sup>H NMR (400 MHz, Chloroform-*d*) δ 8.50 (d, *J* = 4.0 Hz, 2H), 8.04 (s, 1H), 7.87 (s, 1H), 7.66 (d, *J* = 8.0 Hz, 1H), 7.50 (m, *J* = 8.6, 2.1 Hz, 1H), 6.85 (t, *J* = 4.8 Hz, 1H), 4.36 (q, *J* = 7.1 Hz, 2H), 1.32 (t, *J* = 7.1 Hz, 3H).

<sup>13</sup>C NMR (101 MHz, Chloroform-*d*) δ 163.4 (t, *J* = 34.6 Hz), 159.4, 158.0, 142.8, 132.5 (t, *J* = 4.4 Hz), 127.7 (t, *J* = 8.4 Hz), 124.1 (t, *J* = 24.8 Hz), 119.9, 116.4, 113.7, 112.3 (t, *J* = 250.1 Hz), 63.3, 13.8.

<sup>19</sup>F NMR (376 MHz, Chloroform-*d*) δ -101.2.

HRMS(ESI) Calcd for C<sub>14</sub>H<sub>12</sub>ClF<sub>2</sub>N<sub>3</sub>O<sub>2</sub> [M+H<sup>+</sup>]: 328.0659, found: 328.0653.

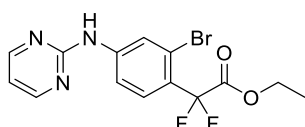

**ethyl 2-(2-bromo-4-(pyrimidin-2-ylamino)phenyl)-2,2-difluoroacetate (3f)**

amorphous yellow solid, 43% (31.8 mg), M.p. (from CHCl<sub>3</sub>): 115-120 °C.

<sup>1</sup>H NMR (400 MHz, Chloroform-*d*) δ 8.50 (d, *J* = 4.8 Hz, 2H), 8.18 (s, 1H), 8.05 (s, 1H), 7.66 (d, *J* = 8.8 Hz, 1H), 7.60 (d, *J* = 8.6 Hz, 1H), 6.85 (t, *J* = 4.8 Hz, 1H), 4.36 (q, *J* = 7.2 Hz, 2H), 1.33 (t, *J* = 7.2 Hz, 3H).

<sup>13</sup>C NMR (101 MHz, Chloroform-*d*) δ 163.4 (t, *J* = 34.6 Hz), 159.4, 158.1, 142.8, 128.1 (t, *J* = 8.8 Hz), 125.8 (t, *J* = 24.6 Hz), 123.3, 120.8 (t, *J* = 4.2 Hz), 117.0, 113.8, 113.0 (t, *J* = 248.7 Hz), 63.4, 13.9.

<sup>19</sup>F NMR (376 MHz, Chloroform-*d*) δ -100.6.

HRMS(ESI) Calcd for C<sub>14</sub>H<sub>12</sub>BrF<sub>2</sub>N<sub>3</sub>O<sub>2</sub> [M+H<sup>+</sup>]: 372.0154, found: 372.0159.

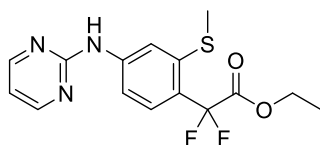

**ethyl 2,2-difluoro-2-(2-(methylthio)-4-(pyrimidin-2-ylamino)phenyl)acetate (3g)**

amorphous yellow solid, 40% (27.2 mg), M.p. (from CHCl<sub>3</sub>): 98-102 °C.

<sup>1</sup>H NMR (400 MHz, Chloroform-*d*) δ 8.48 (d, *J* = 4.8 Hz, 2H), 7.95 (s, 1H), 7.73 (s, 1H), 7.63 (d, *J* = 8.6 Hz, 1H), 7.51 (d, *J* = 8.5 Hz, 1H), 6.82 (t, *J* = 4.8 Hz, 1H), 4.35 (q, *J* = 7.1 Hz, 2H), 2.47 (s, 3H), 1.33 (t, *J* = 7.1 Hz, 3H).

<sup>13</sup>C NMR (101 MHz, Chloroform-*d*) δ 164.1 (t, *J* = 34.8 Hz), 159.6, 158.0, 142.1, 137.5 (t, *J* = 4.2 Hz), 127.1 (t, *J* = 9.1 Hz), 126.3 (t, *J* = 23.6 Hz), 120.0, 116.1, 113.4, 113.2 (t, *J* = 248.0 Hz), 63.0, 18.2, 13.8.

<sup>19</sup>F NMR (376 MHz, Chloroform-*d*) δ -98.3.

HRMS(ESI) Calcd for C<sub>15</sub>H<sub>15</sub>F<sub>2</sub>N<sub>3</sub>O<sub>2</sub>S [M+H<sup>+</sup>]: 340.0926, found: 340.0922.

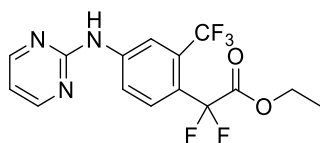

**ethyl 2,2-difluoro-2-(4-(pyrimidin-2-ylamino)-2-(trifluoromethyl)phenyl)acetate (3h)**

yellow solid, 23% (16.6 mg), M.p. (from CHCl<sub>3</sub>): 98-100 °C.

<sup>1</sup>H NMR (400 MHz, Chloroform-*d*) δ 8.52 (d, *J* = 4.9 Hz, 2H), 8.17 – 8.14 (m, 1H), 8.08 (s, 1H), 7.99 (d, *J* = 8.7 Hz, 1H), 7.78 (d, *J* = 8.7 Hz, 1H), 6.88 (t, *J* = 4.8 Hz, 1H), 4.33 (q, *J* = 7.1 Hz, 2H), 1.31 (t, *J* = 7.2 Hz, 3H).

<sup>13</sup>C NMR (101 MHz, Chloroform-*d*) δ 163.5 (t, *J* = 35.1 Hz), 159.4, 158.1, 142.2, 129.2 (t, *J* = 10.1 Hz), 128.5 (d, *J* = 32.7 Hz), 123.4 (t, *J* = 26.2 Hz), 123.3 (q, *J* = 273.9 Hz), 120.7, 117.3 (q, *J* = 6.2 Hz), 114.0, 113.0 (t, *J* = 252.2 Hz), 63.3, 13.8.

<sup>19</sup>F NMR (376 MHz, Chloroform-*d*) δ -58.6 (t, *J* = 11.3 Hz), -98.0 (q, *J* = 11.1, 10.4 Hz).

HRMS(ESI) Calcd for C<sub>15</sub>H<sub>12</sub>F<sub>5</sub>N<sub>3</sub>O<sub>2</sub> [M+H<sup>+</sup>]: 362.0922, found: 362.0915.

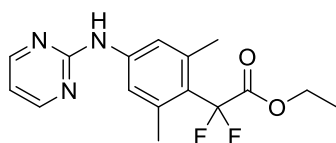

**ethyl 2-(2,6-dimethyl-4-(pyrimidin-2-ylamino)phenyl)-2,2-difluoroacetate (3j)**

amorphous yellow solid, 51% (32.7 mg), M.p. (from CHCl<sub>3</sub>): 65-70 °C.

<sup>1</sup>H NMR (400 MHz, Chloroform-*d*) δ 8.46 (d, *J* = 4.8 Hz, 2H), 7.75 – 7.52 (m, 1H), 7.36 (s, 2H), 6.78 (t, *J* = 4.8 Hz, 1H), 4.30 (q, *J* = 7.1 Hz, 2H), 2.48 (t, *J* = 4.3 Hz, 6H), 1.31 (t, *J* = 7.1 Hz, 3H).

<sup>13</sup>C NMR (101 MHz, Chloroform-*d*) δ 164.6 (t, *J* = 35.9 Hz), 159.8, 158.0, 140.5, 138.9 (t, *J* = 3.2 Hz), 123.5 (t, *J* = 22.8 Hz), 120.9, 120.1, 116.1 (t, *J* = 253.0 Hz), 113.0, 63.0, 22.0 (t, *J* = 5.9 Hz), 13.8.

<sup>19</sup>F NMR (376 MHz, Chloroform-*d*) δ -94.3.

HRMS(ESI) Calcd for C<sub>16</sub>H<sub>17</sub>F<sub>2</sub>N<sub>3</sub>O<sub>2</sub> [M+H<sup>+</sup>]: 322.1362, found: 322.1360.

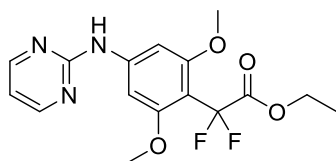

**ethyl 2-(2,6-dimethoxy-4-(pyrimidin-2-ylamino)phenyl)-2,2-difluoroacetate (3k)**

amorphous yellow solid, 41% (28.9 mg), M.p. (from CHCl<sub>3</sub>): 104-110 °C.

<sup>1</sup>H NMR (400 MHz, Chloroform-*d*) δ 8.48 (d, *J* = 4.8 Hz, 2H), 7.75 (s, 1H), 7.03 (s, 2H), 6.81 (t, *J* = 4.8 Hz, 1H), 4.34 (q, *J* = 7.1 Hz, 2H), 3.83 (s, 6H), 1.34 (t, *J* = 7.1 Hz, 3H).

<sup>13</sup>C NMR (101 MHz, Chloroform-*d*) δ 164.8 (t, *J* = 33.3 Hz), 159.7, 159.6 (t, *J* = 2.6 Hz), 157.9, 143.6, 113.3, 113.3 (t, *J* = 247.6 Hz), 103.4 (t, *J* = 24.0 Hz), 95.3, 62.4, 56.1, 14.0.

<sup>19</sup>F NMR (376 MHz, Chloroform-*d*) δ -96.4.

HRMS(ESI) Calcd for C<sub>16</sub>H<sub>17</sub>F<sub>2</sub>N<sub>3</sub>O<sub>4</sub> [M+H<sup>+</sup>]: 354.1260, found: 354.1255.

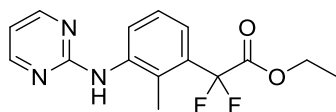

**ethyl 2,2-difluoro-2-(3-methyl-4-(pyrimidin-2-ylamino)phenyl)acetate (3l)**

amorphous yellow solid, 56% (34.3 mg), M.p. (from CHCl<sub>3</sub>): 64-68 °C.

<sup>1</sup>H NMR (400 MHz, Chloroform-*d*) δ 8.38 (d, *J* = 4.4 Hz, 2H), 7.98 (d, *J* = 7.8 Hz, 1H), 7.44 (d, *J* = 8.0 Hz, 1H), 7.34 (t, *J* = 8.0 Hz, 1H), 7.28 (s, 1H), 6.72 (t, *J* = 4.0 Hz, 1H), 4.32 (q, *J* = 8.0 Hz, 2H), 2.34 (s, 3H), 1.31 (t, *J* = 8.0 Hz, 3H).

<sup>13</sup>C NMR (101 MHz, Chloroform-*d*) δ 164.3 (t, *J* = 35.0 Hz), 160.7, 158.2, 138.4, 132.2 (t, *J* = 23.0 Hz), 128.8 (t, *J* = 3.0 Hz), 126.3, 126.0, 122.4 (t, *J* = 9.0 Hz), 114.0 (t, *J* = 250.0 Hz), 112.7, 63.3, 14.0 (t, *J* = 3.0 Hz), 13.9.

<sup>19</sup>F NMR (376 MHz, Chloroform-*d*) δ -99.8.

HRMS(ESI) Calcd for C<sub>15</sub>H<sub>15</sub>F<sub>2</sub>N<sub>3</sub>O<sub>2</sub> [M+H<sup>+</sup>]: 308.1205, found: 308.1206.

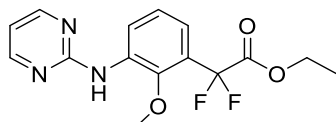

**ethyl 2,2-difluoro-2-(3-methoxy-4-(pyrimidin-2-ylamino)phenyl)acetate (3m)**

amorphous yellow solid, 40% (25.8 mg), M.p. (from CHCl<sub>3</sub>): 75-82 °C.



<sup>1</sup>H NMR (400 MHz, Chloroform-*d*) δ 8.61 – 8.57 (m, 1H), 8.47 (d, *J* = 4.8 Hz, 2H), 7.61 (s, 1H), 7.34 (dd, *J* = 7.9, 1.7 Hz, 1H), 7.29 – 7.24 (m, 1H), 6.79 (t, *J* = 4.8 Hz, 1H), 4.35 (q, *J* = 7.1 Hz, 2H), 3.81 (s, 3H), 1.31 (t, *J* = 7.1 Hz, 3H).  
<sup>13</sup>C NMR (101 MHz, Chloroform-*d*) δ 163.7 (t, *J* = 33.7 Hz), 159.7, 158.1, 146.5 (t, *J* = 5.3 Hz), 133.3, 127.1 (t, *J* = 25.2 Hz), 124.7, 122.9, 119.2 (t, *J* = 7.2 Hz), 113.2, 112.0 (t, *J* = 248.3 Hz), 62.9, 62.0, 13.8.  
<sup>19</sup>F NMR (376 MHz, Chloroform-*d*) δ -100.0.  
**HRMS(ESI)** Calcd for C<sub>15</sub>H<sub>15</sub>F<sub>2</sub>N<sub>3</sub>O<sub>3</sub> [M+H<sup>+</sup>]: 324.1154, found: 324.1161.

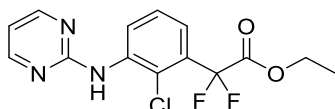

**ethyl 2-(3-chloro-4-(pyrimidin-2-ylamino)phenyl)-2,2-difluoroacetate (30)**

amorphous yellow solid, 37% (24.2 mg), M.p. (from CHCl<sub>3</sub>): 68–71 °C.

<sup>1</sup>H NMR (400 MHz, Chloroform-*d*) δ 8.74 (t, *J* = 5.0 Hz, 1H), 8.48 (d, *J* = 4.8 Hz, 2H), 7.70 (s, 1H), 7.43 (d, *J* = 5.0 Hz, 2H), 6.84 (t, *J* = 4.8 Hz, 1H), 4.36 (q, *J* = 7.1 Hz, 2H), 1.32 (t, *J* = 7.1 Hz, 3H).  
<sup>13</sup>C NMR (101 MHz, Chloroform-*d*) δ 163.2 (t, *J* = 33.9 Hz), 159.4, 158.0, 137.0, 131.4 (t, *J* = 24.4 Hz), 127.2, 122.7, 120.3 (t, *J* = 8.9 Hz), 119.8 (t, *J* = 4.3 Hz), 113.8, 112.2 (t, *J* = 250.7 Hz), 63.4, 13.8.  
<sup>19</sup>F NMR (376 MHz, Chloroform-*d*) δ -102.01.  
**HRMS(ESI)** Calcd for C<sub>14</sub>H<sub>13</sub>ClF<sub>2</sub>N<sub>3</sub>O<sub>2</sub> [M+H<sup>+</sup>]: 328.0659, found: 328.0654.

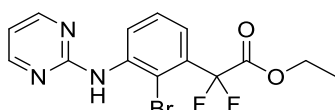

**ethyl 2-(3-bromo-4-(pyrimidin-2-ylamino)phenyl)-2,2-difluoroacetate (3p)**

amorphous yellow solid, 32% (23.7 mg), M.p. (from CHCl<sub>3</sub>): 79–84 °C.

<sup>1</sup>H NMR (400 MHz, Chloroform-*d*) δ 8.66 (dd, *J* = 7.8, 2.0 Hz, 1H), 8.48 (d, *J* = 4.8 Hz, 2H), 7.75 (s, 1H), 7.51 – 7.40 (m, 2H), 6.84 (t, *J* = 4.8 Hz, 1H), 4.36 (q, *J* = 7.1 Hz, 2H), 1.32 (t, *J* = 7.1 Hz, 3H).  
<sup>13</sup>C NMR (101 MHz, Chloroform-*d*) δ 163.1 (t, *J* = 33.9 Hz), 159.5, 158.0, 138.1, 133.4 (t, *J* = 24.2 Hz), 127.9, 123.1, 121.2 (t, *J* = 9.5 Hz), 113.8, 112.8 (d, *J* = 249.2 Hz), 111.2 (d, *J* = 4.0 Hz), 63.4, 13.8.  
<sup>19</sup>F NMR (376 MHz, Chloroform-*d*) δ -101.2.  
**HRMS(ESI)** Calcd for C<sub>14</sub>H<sub>13</sub>BrF<sub>2</sub>N<sub>3</sub>O<sub>2</sub> [M+H<sup>+</sup>]: 372.0154, found: 372.0161.

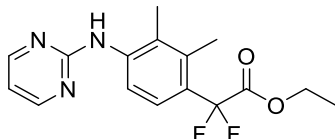

**ethyl 2-(2,3-dimethyl-4-(pyrimidin-2-ylamino)phenyl)-2,2-difluoroacetate (3q)**

amorphous yellow solid, 46% (29.6 mg), M.p. (from CHCl<sub>3</sub>): 62–66 °C.

<sup>1</sup>H NMR (400 MHz, Chloroform-*d*) δ 8.41 (d, *J* = 4.8 Hz, 2H), 7.86 (d, *J* = 8.6 Hz, 1H), 7.50 (d, *J* = 8.7 Hz, 1H), 7.08 (s, 1H), 6.74 (t, *J* = 4.8 Hz, 1H), 4.32 (q, *J* = 7.2 Hz, 2H), 2.33 (s, 3H), 2.25 (s, 3H), 1.32 (t, *J* = 7.1 Hz, 3H).  
<sup>13</sup>C NMR (101 MHz, Chloroform-*d*) δ 164.7 (t, *J* = 35.4 Hz), 160.6, 158.3, 139.5, 136.0 (t, *J* = 2.0 Hz), 129.7, 127.2, 124.3 (t, *J* = 9.6 Hz), 119.9, 113.2 (t, *J* = 250.0 Hz), 112.9, 63.2, 16.8, 14.2, 14.0.  
<sup>19</sup>F NMR (376 MHz, Chloroform-*d*) δ -99.11.  
**HRMS(ESI)** Calcd for C<sub>16</sub>H<sub>17</sub>F<sub>2</sub>N<sub>3</sub>O<sub>2</sub> [M+H<sup>+</sup>]: 322.1362, found: 322.1361.

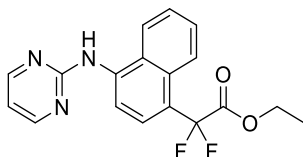

**ethyl 2,2-difluoro-2-(4-(pyrimidin-2-ylamino)naphthalen-1-yl)acetate (3r)**

yellow solid, 53% (36.3 mg), M.p. (from CHCl<sub>3</sub>): 155–158 °C.

<sup>1</sup>H NMR (400 MHz, Chloroform-*d*) δ 8.64 (s, 1H), 8.36 (d, *J* = 4.9 Hz, 2H), 8.27 (d, *J* = 8.1 Hz, 1H), 8.19 (dd, *J* = 8.1, 4.0 Hz, 2H), 7.90 (d, *J* = 8.1 Hz, 1H), 7.58 (dddd, *J* = 17.4, 8.1, 6.8, 1.4 Hz, 2H), 6.72 (t, *J* = 4.8 Hz, 1H), 4.29 (q, *J* = 7.1 Hz, 2H), 1.25 (t, *J* = 7.1 Hz, 3H).  
<sup>13</sup>C NMR (101 MHz, Chloroform-*d*) δ 164.5 (t, *J* = 35.2 Hz), 160.7, 158.2, 137.6, 130.4, 127.4, 127.3, 126.2, 125.4 (t, *J* = 9.6 Hz), 125.0 (t, *J* = 3.1 Hz), 123.9 (t, *J* = 23.6 Hz), 121.9, 117.1, 114.4 (t, *J* = 251.3 Hz), 113.0, 63.2, 13.8.  
<sup>19</sup>F NMR (376 MHz, Chloroform-*d*) δ -99.4.  
**HRMS(ESI)** Calcd for C<sub>18</sub>H<sub>15</sub>F<sub>2</sub>N<sub>3</sub>O<sub>2</sub> [M+H<sup>+</sup>]: 344.1205, found: 344.1211.

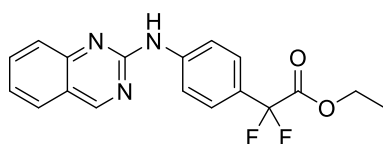

**ethyl 2,2-difluoro-2-(4-(quinazolin-2-ylamino)phenyl)acetate (3s)**

yellow solid, 51% (35 mg), M.p. (from CHCl<sub>3</sub>): 132-138 °C.

<sup>1</sup>H NMR (400 MHz, Chloroform-*d*) δ 9.12 (s, 1H), 7.95 (d, *J* = 8.5 Hz, 2H), 7.85 – 7.69 (m, 3H), 7.62 (d, *J* = 8.5 Hz, 2H), 7.58 (s, 1H), 7.42 – 7.36 (m, 1H), 4.31 (q, *J* = 7.1 Hz, 2H), 1.32 (t, *J* = 7.1 Hz, 3H).

<sup>13</sup>C NMR (101 MHz, Chloroform-*d*) δ 164.5 (t, *J* = 39.3 Hz), 161.96, 156.35, 151.26, 142.15, 134.63, 128.97, 127.49, 126.5 (t, *J* = 5.7 Hz), 126.13, 124.37, 121.08, 118.36, 113.56 (t, *J* = 251.9 Hz), 63.05, 13.93.

<sup>19</sup>F NMR (376 MHz, Chloroform-*d*) δ -103.0.

HRMS(ESI) Calcd for C<sub>18</sub>H<sub>15</sub>F<sub>2</sub>N<sub>3</sub>O<sub>2</sub> [M+H<sup>+</sup>]: 344.1205, found: 344.1208.

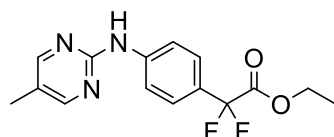

**ethyl 2,2-difluoro-2-(4-((5-methylpyrimidin-2-yl)amino)phenyl)acetate (3t)**

amorphous yellow solid, 45% (27.5 mg), M.p. (from CHCl<sub>3</sub>): 58-64 °C.

<sup>1</sup>H NMR (400 MHz, Chloroform-*d*) δ 8.30 (s, 2H), 7.71 (d, *J* = 8.4 Hz, 2H), 7.56 (d, *J* = 8.5 Hz, 2H), 7.47 (s, 1H), 4.29 (q, *J* = 7.1 Hz, 2H), 2.22 (s, 3H), 1.31 (t, *J* = 7.1 Hz, 3H).

<sup>13</sup>C NMR (101 MHz, Chloroform-*d*) δ 164.24 (t, *J* = 35.9 Hz), 158.05, 157.92, 142.29, 136.25, 126.40 (t, *J* = 6.1 Hz), 125.73, 122.02, 118.13, 113.53 (t, *J* = 251.4 Hz), 62.99, 14.86, 13.89.

<sup>19</sup>F NMR (376 MHz, Chloroform-*d*) δ -103.0.

HRMS(ESI) Calcd for C<sub>15</sub>H<sub>15</sub>F<sub>2</sub>N<sub>3</sub>O<sub>2</sub> [M+H<sup>+</sup>]: 308.1205, found: 308.1202.

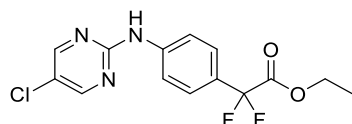

**ethyl 2-(4-((5-chloropyrimidin-2-yl)amino)phenyl)-2,2-difluoroacetate (3u)**

amorphous yellow solid, 41% (26.8 mg), M.p. (from CHCl<sub>3</sub>): 54-58 °C.

<sup>1</sup>H NMR (400 MHz, Chloroform-*d*) δ 8.4 (s, 2H), 7.7 (d, *J* = 8.4 Hz, 2H), 7.6 (d, *J* = 8.4 Hz, 2H), 7.4 (s, 1H), 4.3 (q, *J* = 7.2 Hz, 2H), 1.3 (t, *J* = 7.2 Hz, 3H).

<sup>13</sup>C NMR (101 MHz, Chloroform-*d*) δ 164.1 (t, *J* = 35.3 Hz), 157.9, 156.3, 139.4, 133.6 (t, *J* = 25.6 Hz), 129.4, 121.5, 121.5, 119.7 (t, *J* = 6.1 Hz), 116.1 (t, *J* = 6.5 Hz), 113.2 (t, *J* = 252.4 Hz), 63.2, 13.9.

<sup>19</sup>F NMR (376 MHz, Chloroform-*d*) δ -103.2.

HRMS(ESI) Calcd for C<sub>14</sub>H<sub>12</sub>ClF<sub>2</sub>N<sub>3</sub>O<sub>2</sub> [M+H<sup>+</sup>]: 328.0659, found: 328.0653.

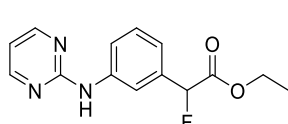

(4w)

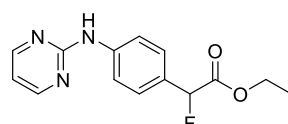

(3w)

**ethyl 2-fluoro-2-(3-(pyrimidin-2-ylamino)phenyl)acetate (4w)**

<sup>1</sup>H NMR (400 MHz, Chloroform-*d*) δ 8.44 (d, *J* = 4.8 Hz, 2H), 7.77 (s, 1H), 7.74 (s, 1H), 7.70 (d, *J* = 7.0 Hz, 1H), 7.37 (t, *J* = 7.9 Hz, 1H), 7.14 (dd, *J* = 7.7, 1.6 Hz, 1H), 6.76 (t, *J* = 4.8 Hz, 1H), 5.79 (d, *J* = 47.8 Hz, 1H), 4.25 (dd, *J* = 19.9, 7.1 Hz, 2H), 1.27 (t, *J* = 7.1 Hz, 3H).

<sup>19</sup>F NMR (376 MHz, Chloroform-*d*) δ -180.1.

**ethyl 2-fluoro-2-(4-(pyrimidin-2-ylamino)phenyl)acetate (3w)**

<sup>1</sup>H NMR (400 MHz, Chloroform-*d*) δ 8.45 (d, *J* = 4.5 Hz, 2H), 7.74 (s, 1H), 7.68 (d, *J* = 4.8 Hz, 2H), 7.43 (d, 2H), 6.77 (s, *J* = 4.8 Hz, 1H), 5.74 (d, *J* = 47.8 Hz, 1H), 4.26 – 4.18 (m, 2H), 1.26 (t, 3H).

<sup>19</sup>F NMR (376 MHz, Chloroform-*d*) δ -175.9.

**Mixture (4w:3w = 5:1)** yellow oil, 37% (20.3 mg).

<sup>13</sup>C NMR (101 MHz, Chloroform-*d*) δ 168.7, 168.4, 159.9 (d, *J* = 8.1 Hz), 158.0, 139.9, 135.1, 134.9, 129.3, 127.8 (d, *J* = 5.5 Hz), 120.6, 120.6, 120.3, 120.3, 119.2, 117.3, 117.2, 112.9, 89.3 (d, *J* = 185.7 Hz), 89.2 (d, *J* = 184.6 Hz), 61.9, 61.8, 14.0.

HRMS(ESI) Calcd for C<sub>14</sub>H<sub>14</sub>FN<sub>3</sub>O<sub>2</sub> [M+H<sup>+</sup>]: 276.1143, found: 276.1149.

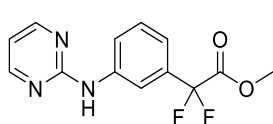

(4x)

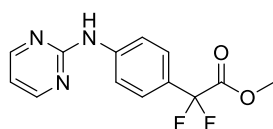

(3x)

**methyl 2,2-difluoro-2-(3-(pyrimidin-2-ylamino)phenyl)acetate (4x)**

<sup>1</sup>H NMR (400 MHz, Chloroform-*d*) δ 8.46 (d, *J* = 4.8 Hz, 2H), 8.01 (s, 1H), 7.88 (s, 1H), 7.83 (d, *J* = 8.2 Hz, 1H), 7.42 (t, *J* = 7.9 Hz, 1H), 7.26 (s, 1H), 6.78 (t, *J* = 4.8 Hz, 1H), 3.85 (s, 3H).

<sup>19</sup>F NMR (376 MHz, Chloroform-*d*) δ -103.9.

**methyl 2,2-difluoro-2-(4-(pyrimidin-2-ylamino)phenyl)acetate (3x)**

<sup>1</sup>H NMR (400 MHz, Chloroform-*d*) δ 8.46 (d, *J* = 4.9 Hz, 2H), 8.01 (s, 3H), 7.76 (d, *J* = 8.6 Hz, 2H), 7.59 (d, *J* = 8.7 Hz, 2H), 6.82 (t, *J* = 4.8 Hz, 1H), 3.87 (s, 3H).

<sup>19</sup>F NMR (376 MHz, Chloroform-*d*) δ -103.1.

**Mixture (4x:3x = 10:1)** yellow oil, 55% (30.6 mg).

<sup>13</sup>C NMR (101 MHz, Chloroform-*d*) δ 164.7 (t, *J* = 35.7 Hz), 159.8, 158.0, 140.0, 136.2, 133.3 (t, *J* = 25.4 Hz), 129.3, 128.6, 126.4 (t, *J* = 5.9 Hz), 121.8, 119.2 (t, *J* = 6.2 Hz), 118.8, 116.1 (t, *J* = 6.4 Hz), 115.8, 113.3, 113.1, 110.8, 53.6.

**HRMS(ESI)** Calcd for C<sub>13</sub>H<sub>11</sub>F<sub>2</sub>N<sub>3</sub>O<sub>2</sub> [M+H<sup>+</sup>]: 280.0892, found: 280.0894.

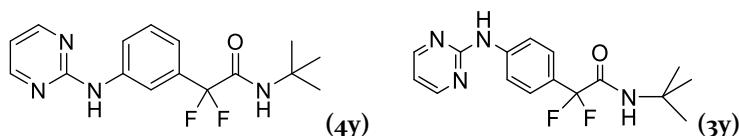**N-(tert-butyl)-2,2-difluoro-2-(3-(pyrimidin-2-ylamino)phenyl)acetamide (4y)**

<sup>1</sup>H NMR (400 MHz, Chloroform-*d*) δ 8.45 (d, *J* = 4.8 Hz, 2H), 7.90 (s, 1H), 7.88 (s, 1H), 7.78 (d, *J* = 8.1 Hz, 1H), 7.40 (t, *J* = 8.0 Hz, 1H), 7.25 (d, *J* = 6.4 Hz, 1H), 6.76 (t, *J* = 4.8 Hz, 1H), 6.31 (s, 1H), 1.40 (s, 9H).

<sup>19</sup>F NMR (376 MHz, Chloroform-*d*) δ -101.8.

**N-(tert-butyl)-2,2-difluoro-2-(4-(pyrimidin-2-ylamino)phenyl)acetamide (3y)**

<sup>1</sup>H NMR (400 MHz, Chloroform-*d*) δ 8.45 (d, *J* = 4.8 Hz, 2H), 7.72 (d, *J* = 8.7 Hz, 2H), 7.56 (d, *J* = 8.7 Hz, 2H), 7.42 (s, 1H), 6.79 (t, *J* = 4.8 Hz, 1H), 6.25 (s, 1H), 1.40 (s, 9H).

<sup>19</sup>F NMR (376 MHz, Chloroform-*d*) δ -100.8.

**Mixture (4y:3y = 1:1)** white solid, 41% (26.2 mg).

<sup>13</sup>C NMR (101 MHz, Chloroform-*d*) δ 163.35, 163.13, 159.92, 159.81, 158.17, 158.04, 145.37, 141.83, 139.88, 134.07 (t, *J* = 25.4 Hz), 133.34, 133.25, 129.39, 129.25, 126.61, 126.54, 121.60, 118.77, 117.67, 116.46, 116.39, 114.81, 114.58, 113.98, 113.87, 113.31, 113.24, 113.09, 113.03, 52.21, 52.13, 28.57, 28.49.

**HRMS(ESI)** Calcd for C<sub>16</sub>H<sub>18</sub>F<sub>2</sub>N<sub>4</sub>O [M+H<sup>+</sup>]: 321.1521, found: 321.1526.

**3. Difluoromethylated aniline derivatives diversified transformations****(a) Cyclization (synthesis of difluoromethyl modified imidazo[1,2-*a*]pyrimidine 6)**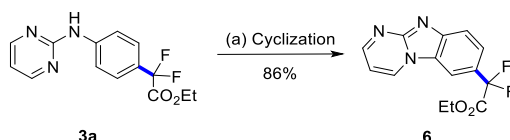

To an oven-dried flask containing substrates **3a** (0.3 mmol, 88 mg) and PIFA (0.45 mmol, 1.5 equiv.), MeCN (1.5 mL) was added. The reaction mixture was stirred at room temperature, which was monitored by TLC. Upon completion, the mixture was extracted with ethyl acetate (3\*10 mL). The combined organic phase was washed with brine and dried with Na<sub>2</sub>SO<sub>4</sub>. After that, the solid was filtered off through a thin pad of *Celite*, and the filtrate was evaporated in vacuo to give the crude product, which was purified by column chromatography on silica gel (ethyl acetate) to give ethyl 2-(benzo[4,5]imidazo[1,2-*a*]pyrimidin-7-yl)-2,2-difluoroacetate **6** as light yellow solid (75 mg, 86%), M.p.:218-222 °C.

**ethyl 2-(benzo[4,5]imidazo[1,2-*a*]pyrimidin-7-yl)-2,2-difluoroacetate (6)**

<sup>1</sup>H NMR (400 MHz, Chloroform-*d*) δ 8.93 (dd, *J* = 6.8, 2.2 Hz, 1H), 8.89 (dd, *J* = 4.1, 2.1 Hz, 1H), 8.24 (d, *J* = 1.6 Hz, 1H), 8.07 (d, *J* = 8.7 Hz, 1H), 7.80 (dd, *J* = 8.7, 1.8 Hz, 1H), 7.06 (dd, *J* = 6.8, 4.1 Hz, 1H), 4.32 (q, *J* = 7.1 Hz, 2H), 1.31 (t, *J* = 7.1 Hz, 3H).

<sup>13</sup>C NMR (101 MHz, Chloroform-*d*) δ 164.35 (t, *J* = 36.0 Hz), 156.84, 151.93, 145.92, 133.91, 126.57, 126.49 (t, *J* = 26.2 Hz), 123.66 (t, *J* = 5.4 Hz), 121.04, 112.42 (t, *J* = 251.8 Hz), 109.1 (t, *J* = 7.0 Hz), 107.52, 63.48, 13.98.

<sup>19</sup>F NMR (376 MHz, Chloroform-*d*) δ -102.27.

**HRMS(ESI)** Calcd for C<sub>14</sub>H<sub>11</sub>F<sub>2</sub>N<sub>3</sub>O<sub>2</sub> [M+H<sup>+</sup>]: 292.0892, found: 292.0896.

**(b) Hydrolysis (procedure of hydrolysis of ethyl ester 7)**

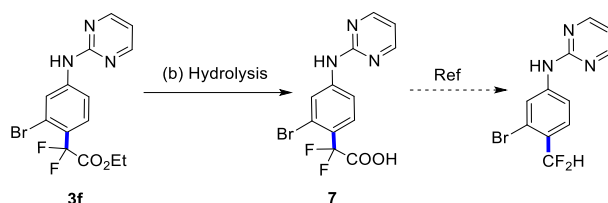

To a solution of **3f** (37.2 mg, 0.1 mmol) in MeOH (1 mL) was added  $K_2CO_3$  (1 mL, 1N) at 23 °C. The mixture was stirred at 23 °C for 20 min and poured into 5% HCl (1 mL), and successively extracted with EtOAc (5 mL  $\times$  3). The combined organic phase was washed with brine and dried over anhydrous  $Na_2SO_4$ . After removal of the solvents in vacuo, the residue was purified by column chromatography ( $CH_2Cl_2/MeOH = 5/1$ ) to give **7** (34 mg, 98%) as colorless solid.

**2-(2-Bromo-4-(pyrimidin-2-ylamino)phenyl)-2,2-difluoroacetic acid (7):**

$^1H$  NMR (400 MHz,  $DMSO-d_6$ )  $\delta$  9.94 (d,  $J = 1.6$  Hz, 1H), 8.55 (d,  $J = 4.8$  Hz, 2H), 8.18 (d,  $J = 2.1$  Hz, 1H), 7.75 (dd,  $J = 8.6$ , 2.2 Hz, 1H), 7.47 (d,  $J = 8.7$  Hz, 1H), 6.92 (t,  $J = 4.8$  Hz, 1H).

$^{13}C$  NMR (101 MHz,  $DMSO-d_6$ )  $\delta$  159.69 (t,  $J = 34.6$  Hz), 158.25, 142.26, 129.34, 129.08, 128.18 (t,  $J = 8.3$  Hz), 122.77, 119.71 (t,  $J = 3.5$  Hz), 116.46, 115.60 (t,  $J = 248.7$  Hz), 113.33.

$^{19}F$  NMR (376 MHz,  $DMSO-d_6$ )  $\delta$  -96.36.

HRMS(ESI) Calcd for  $C_{12}H_8BrF_2N_3O_2$  [ $M+H^+$ ]: 343.9841, found: 343.9846.

## 4. Mechanistic Studies

### (a) H/D Scrambling

#### Synthesis<sup>2</sup> of **1a-[d<sub>5</sub>]**:

To a 250 mL three-necked round bottomed flask was charged 2-amino-4-chloroaminopyrimidine (1.42 g, 11 mmol), copper iodide (952 mg, 5 mmol, 50 mol%) and potassium carbonate (2.76 g, 20 mmol). A condenser was equipped and the flask was evacuated and refilled with nitrogen three times.  $d_5$ -bromobenzene (1.05 mL, 1.62 mmol, 10 mmol),  $N,N'$ -dimethylethylenediamine (538  $\mu$ L, 441 mg, 5 mmol, 50 mol%) and 1,4-dioxane (40 mL) were then added *via* septum. The reaction mixture was heated to 100 °C for 72 h. After this time, the reaction mixture was allowed to cool to room temperature and concentrated ammonia solution (20 mL) and brine (80 mL) were added and extracted with EtOAc (3  $\times$  100 mL). The combined organic phases were dried over  $MgSO_4$  and concentrated *in vacuo*. The crude residue was purified *via* silica gel column chromatography (EtOAc/Hexanes, 5:95 v:v) to give pure white solid, 33% (706 mg).

#### *para/meta* C-H Alkylation of **1a-d<sub>5</sub>**

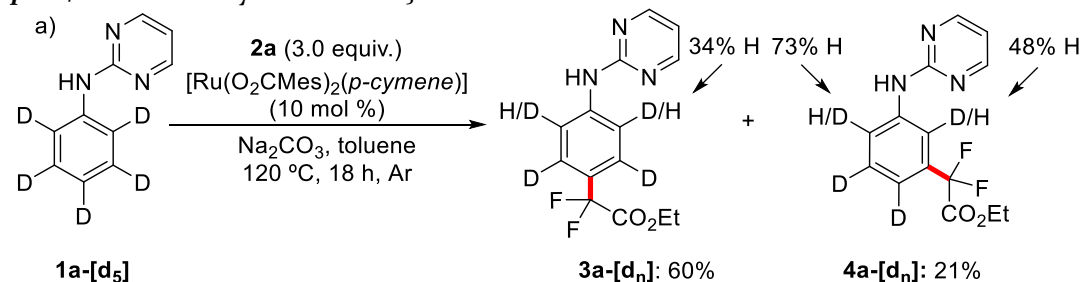

**1a-[d<sub>5</sub>]** (0.2 mmol, 1.0 equiv.),  $BrCF_2CO_2Et$  (80  $\mu$ L, 121.8 mg, 3 equiv.),  $[Ru(O_2CMes)_2(p-cymene)]$  (5.6 mg, 10 mol %),  $Na_2CO_3$  (42.4 mg, 2 equiv.), and toluene (1 mL) were placed in a 10 mL glass tube sealed under argon atmosphere was heated at 120 °C for 18 hours. The reaction mixture cooled to room temperature and concentrated *in vacuo*. The resulting residue was purified by column chromatography (PE/EA) on silica gel to give the product **3a-[d<sub>n</sub>]** and **4a-[d<sub>n</sub>]**. The D incorporation was determined by  $^1H$ -NMR spectroscopy.

**3a-[d<sub>n</sub>]** – 34% H in each *ortho* position

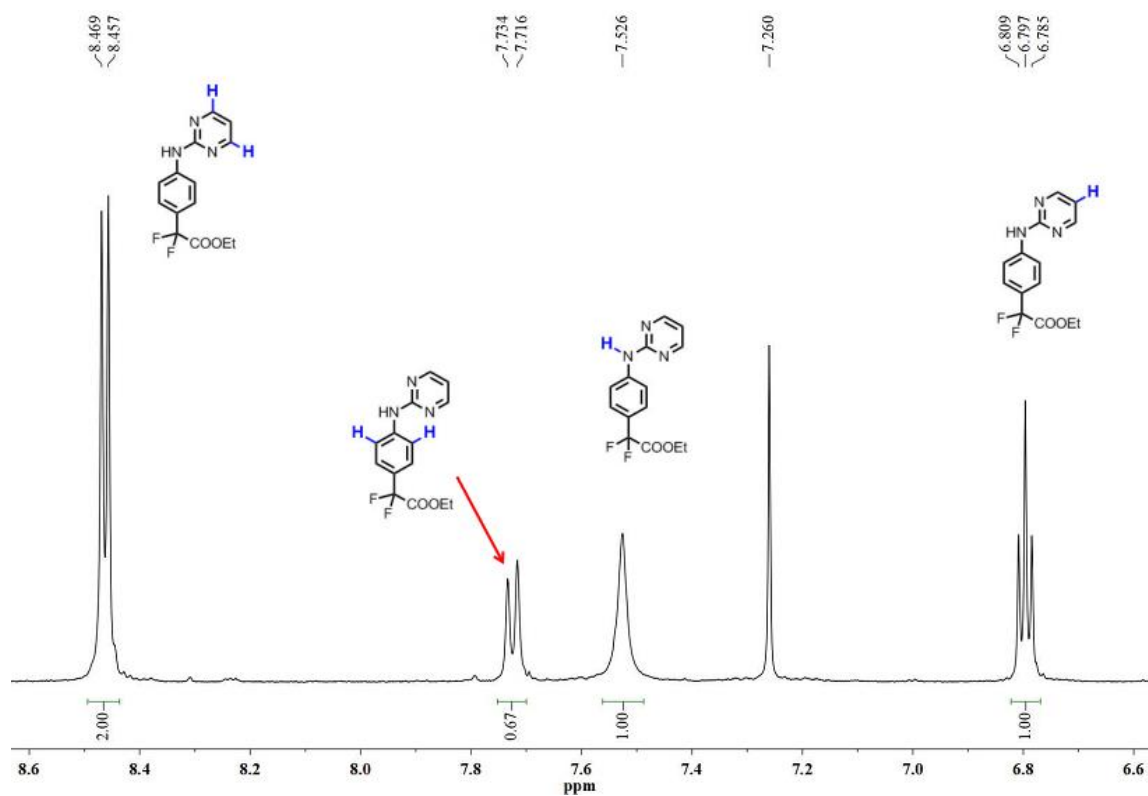

4a-[d<sub>n</sub>] - 48% and 73% H in *ortho* position

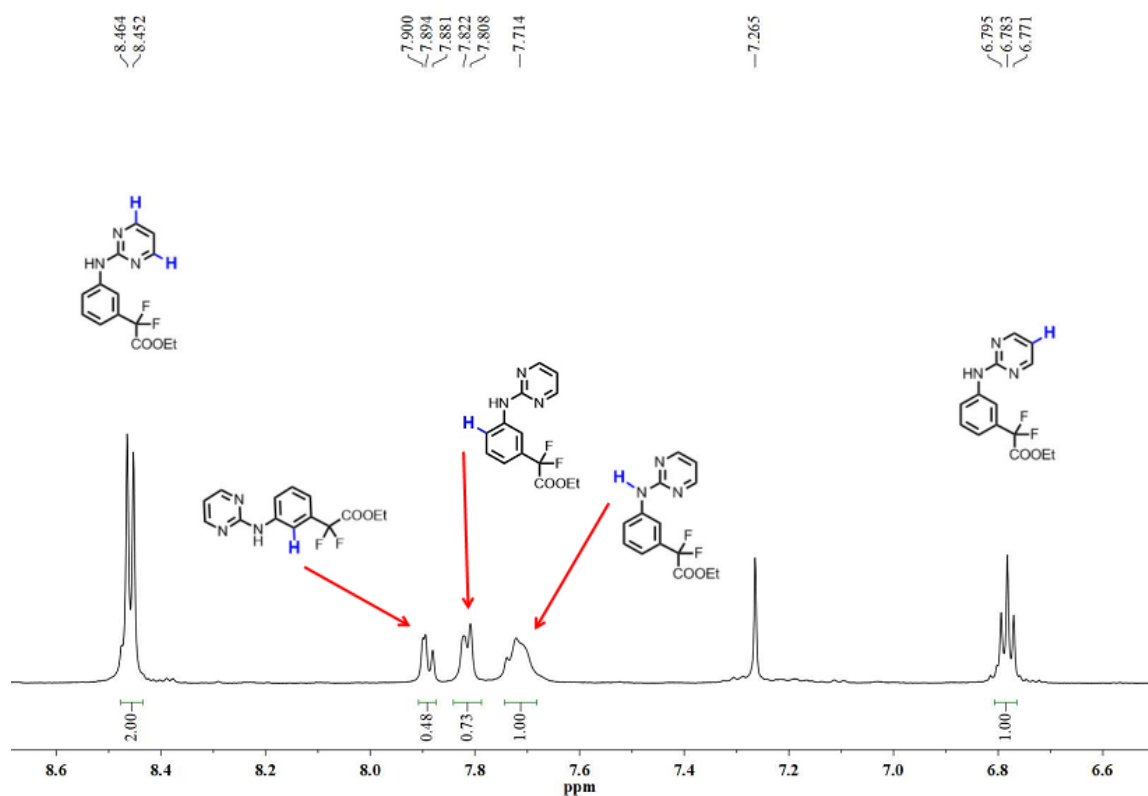

*para*-selective C-H Alkylation of 1a-d<sub>5</sub>

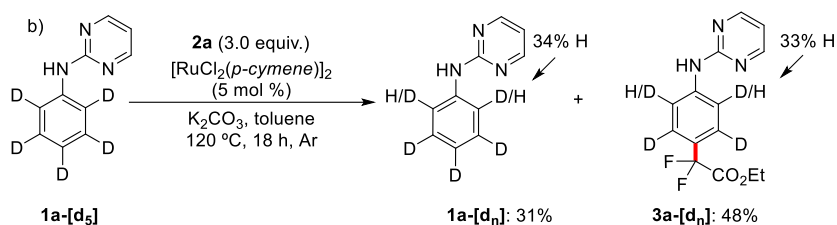

**1a-[d<sub>5</sub>]** (0.2 mmol, 1.0 equiv.), BrCF<sub>2</sub>CO<sub>2</sub>Et (80 μL, 121.8 mg, 3 equiv.), [RuCl<sub>2</sub>(p-cymene)]<sub>2</sub> (6.1 mg, 5 mol %), K<sub>2</sub>CO<sub>3</sub> (27.8 mg, 2 equiv.), and toluene (1 mL) were placed in a 10 mL glass tube sealed under argon atmosphere was heated at 120 °C for 18 hours. The reaction mixture cooled to room temperature and concentrated in vacuo. The resulting residue was purified by column chromatography (PE/EA) on silica gel to give **1a-[d<sub>n</sub>]** and the product **3a-[d<sub>n</sub>]**. The D incorporation was determined by <sup>1</sup>H-NMR spectroscopy.

**1a-[d<sub>n</sub>]** – 34% H in each *ortho* position

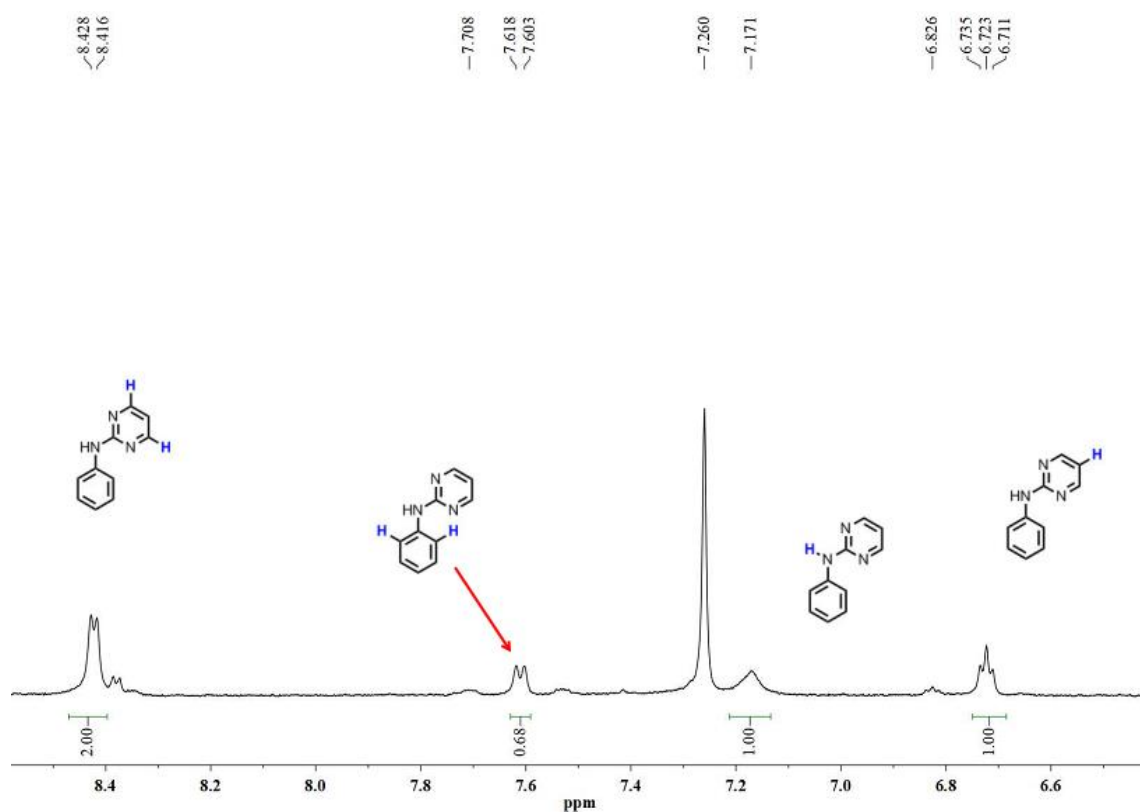

**3a-[d<sub>n</sub>]** – 34% H in each *ortho* position

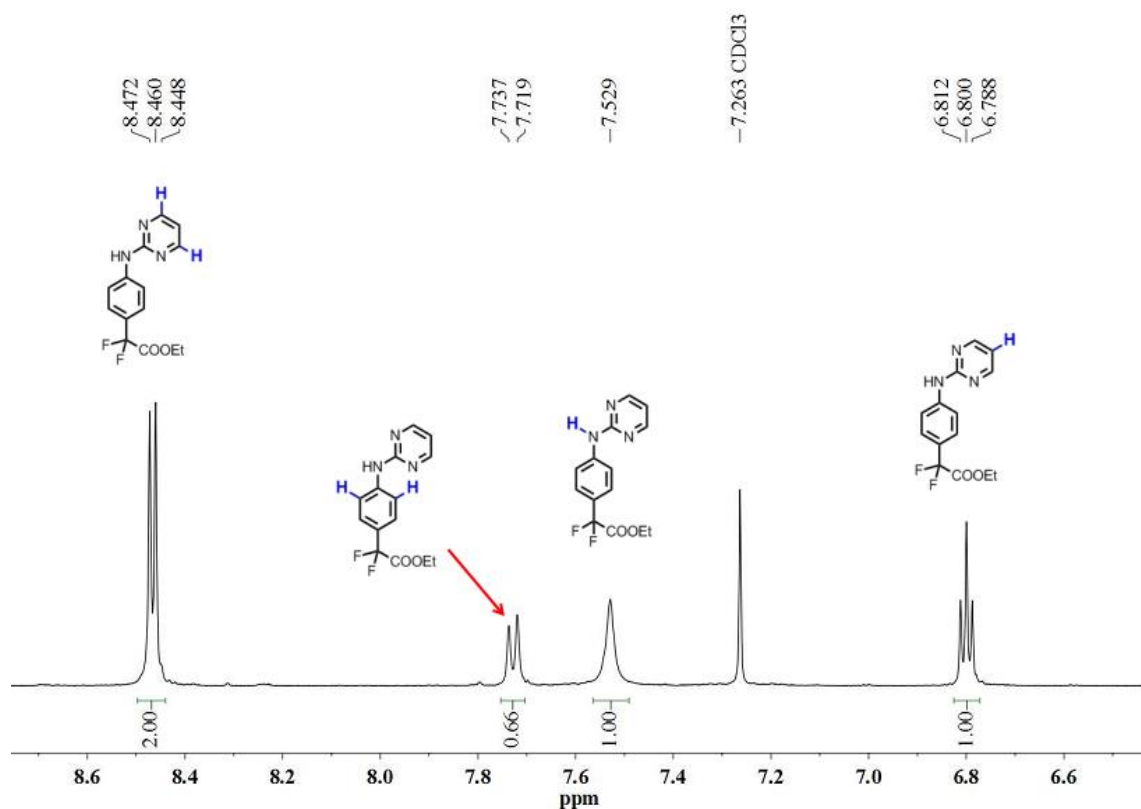

### (b) Reversible H/D exchange

(b) Reversible H/D exchange

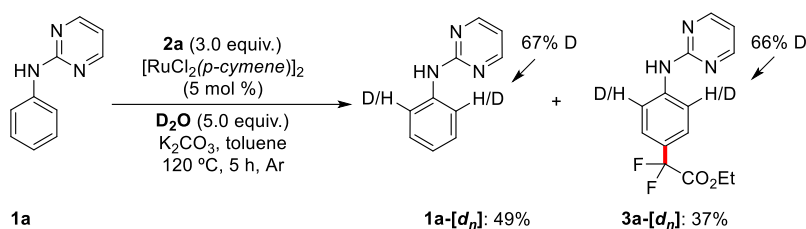

**1a** (0.2 mmol, 1.0 equiv.),  $BrCF_2CO_2Et$  (80  $\mu L$ , 121.8 mg, 3 equiv.),  $[RuCl_2(p\text{-cymene})]_2$  (6.1 mg, 5 mol %),  $K_2CO_3$  (27.8 mg, 2 equiv.),  $D_2O$  (50  $\mu L$ ) and toluene (1 mL) were placed in a 10 mL glass tube sealed under argon atmosphere was heated at  $120^\circ C$  for 5 hours. At ambient temperature, the reaction mixture was diluted with  $H_2O$  (5 mL) and extracted with EtOAc (3\*10 mL). The combined organic layer was dried with  $Na_2SO_4$  and concentrated under reduced pressure. The resulting residue was purified by column chromatography (PE/EA) on silica gel to give **1a**-[ $d_n$ ] and the product **3a**-[ $d_n$ ]. The D incorporation was determined by  $^1H$ -NMR spectroscopy.

**1a**-[ $d_n$ ] – 67% D incorporation in each *ortho* position

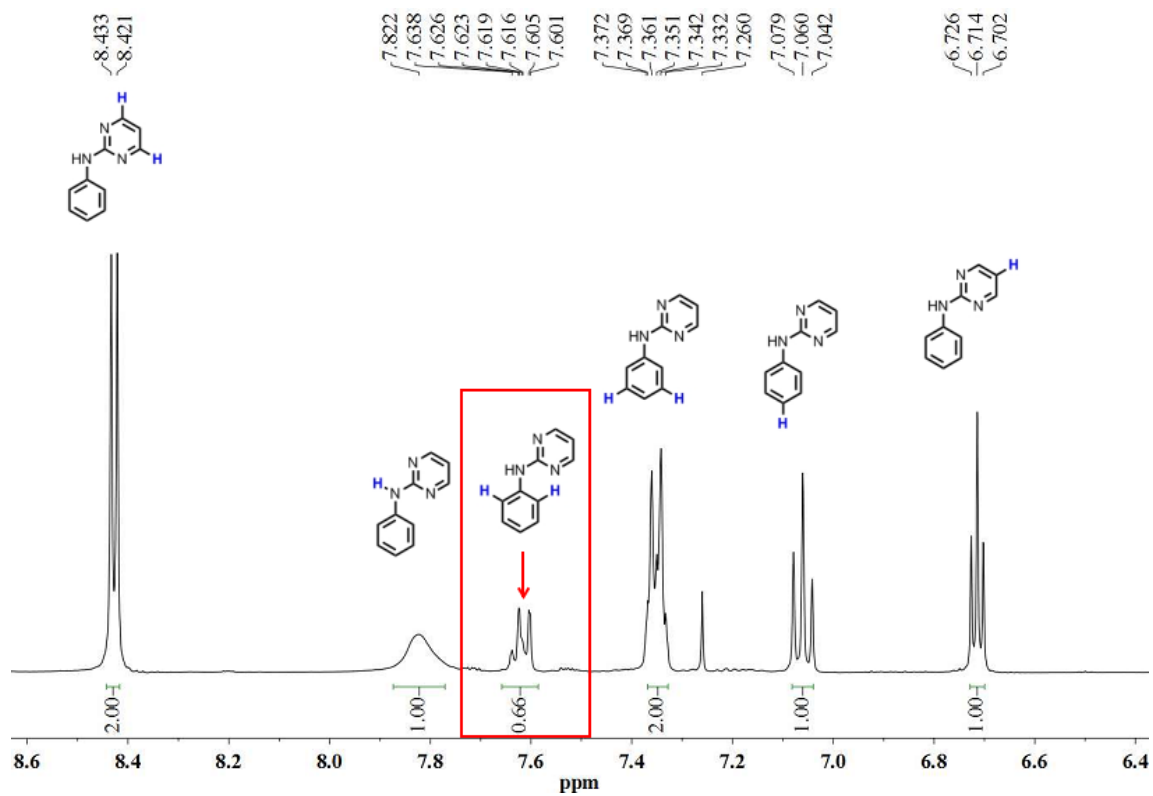

3a-[d<sub>n</sub>] - 66% D incorporation in each *ortho* position

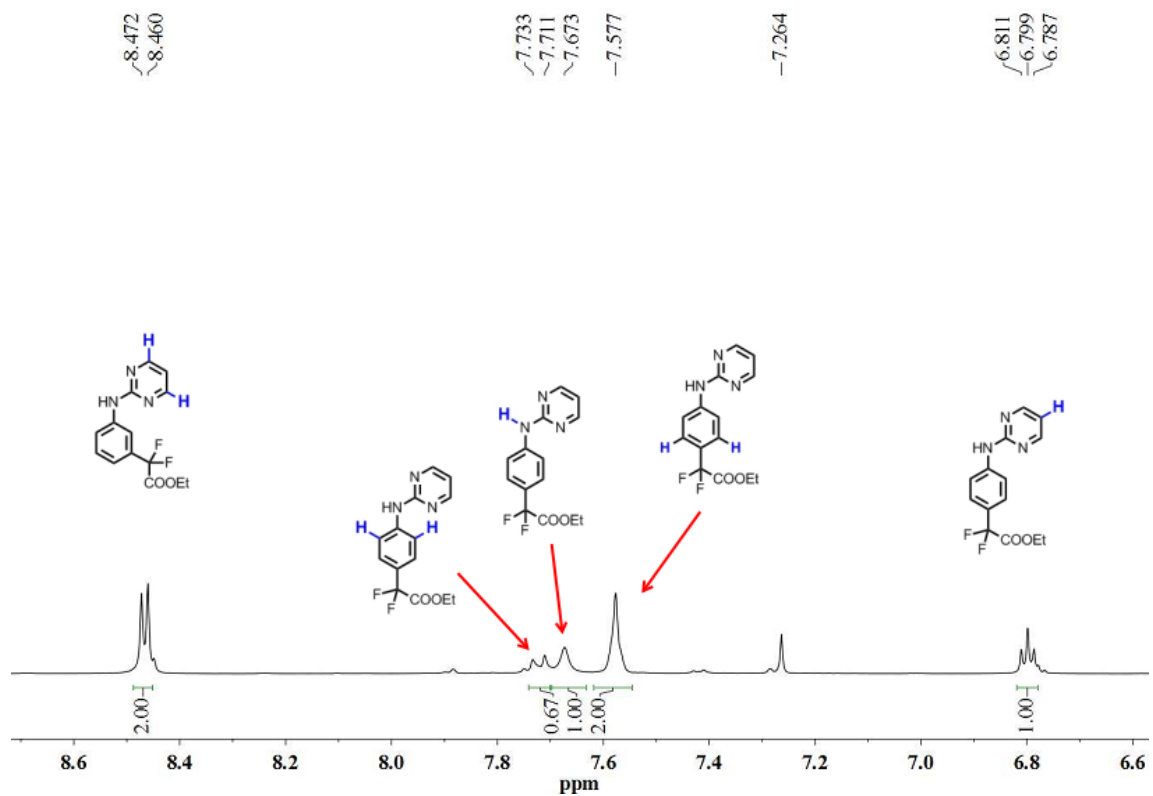



### (c) Radical mechanism experiment

(c) Radical mechanism experiment

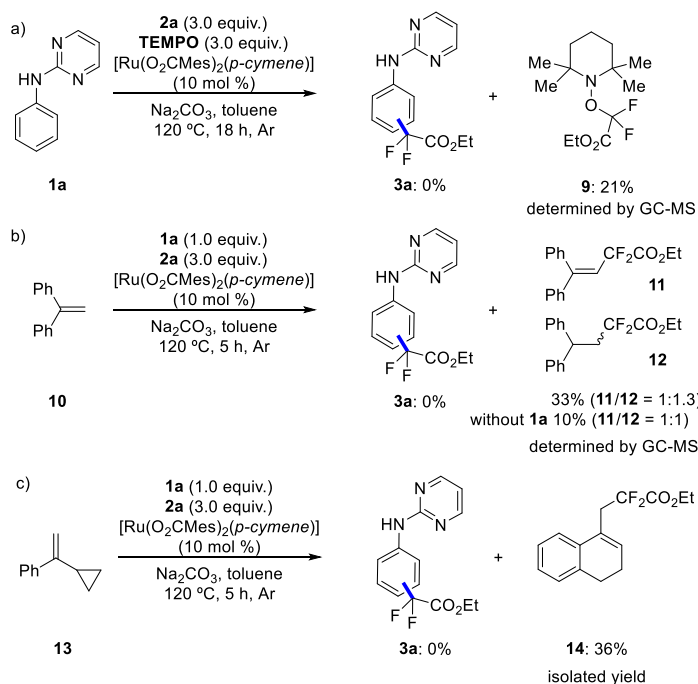

- a) A mixture of **1** (0.2 mmol, 1.0 equiv.),  $\text{BrCF}_2\text{CO}_2\text{Et}$  (80  $\mu\text{L}$ , 121.8 mg, 3 equiv.), TEMPO (93.7 mg, 0.6 mmol),  $[\text{Ru}(\text{O}_2\text{CMes})_2(p\text{-cymene})]$  (5.6 mg, 10 mol %),  $\text{Na}_2\text{CO}_3$  (42.4 mg, 2 equiv.), and toluene (1 mL) in a 10 mL glass tube sealed under argon atmosphere was heated at 120  $^\circ\text{C}$  for 18 hours. After completion of the reaction, GC-MS was employed to detect the result.
- b) A mixture of **1** (0.2 mmol, 1.0 equiv.),  $\text{BrCF}_2\text{CO}_2\text{Et}$  (80  $\mu\text{L}$ , 121.8 mg, 3 equiv.), **10** (34.2  $\mu\text{L}$ , 0.2 mmol),  $[\text{Ru}(\text{O}_2\text{CMes})_2(p\text{-cymene})]$  (5.6 mg, 10 mol %),  $\text{Na}_2\text{CO}_3$  (42.4 mg, 2 equiv.), and toluene (1 mL) in a 10 mL glass tube sealed under argon atmosphere was heated at 120  $^\circ\text{C}$  for 5 hours. After completion of the reaction, **11**, **12** and the ratio was determined by GC-MS.
- c) A mixture of **1** (0.2 mmol, 1.0 equiv.),  $\text{BrCF}_2\text{CO}_2\text{Et}$  (80  $\mu\text{L}$ , 121.8 mg, 3 equiv.), **13** (34.2  $\mu\text{L}$ , 0.2 mmol),  $[\text{Ru}(\text{O}_2\text{CMes})_2(p\text{-cymene})]$  (5.6 mg, 10 mol %),  $\text{Na}_2\text{CO}_3$  (42.4 mg, 2 equiv.), and toluene (1 mL) in a 10 mL glass tube sealed under argon atmosphere was heated at 120  $^\circ\text{C}$  for 18 hours. After completion of the reaction, The resulting residue was purified by column chromatography (PE/EA) on silica gel to give the product **14**.

ethyl 3-(3,4-dihydronaphthalen-1-yl)-2,2-difluoropropanoate (**14**):

colorless oil, 36%.

$^1\text{H}$  NMR (400 MHz, Chloroform-*d*)  $\delta$  7.23 – 7.09 (m, 4H), 6.06 (t,  $J$  = 4.6 Hz, 1H), 4.11 (q,  $J$  = 7.1 Hz, 2H), 3.22 (t,  $J$  = 15.9 Hz, 2H), 2.71 (t,  $J$  = 8.0 Hz, 2H), 2.25 (td,  $J$  = 8.0, 4.7 Hz, 2H), 1.18 (t,  $J$  = 7.1 Hz, 3H).

$^{13}\text{C}$  NMR (101 MHz, Chloroform-*d*)  $\delta$  164.03 (t,  $J$  = 32.7 Hz), 136.29, 133.84, 131.56, 127.58, 127.32 (t,  $J$  = 4.4 Hz), 127.12, 126.28, 122.81, 115.48 (t,  $J$  = 252.2 Hz), 62.63, 37.28 (t,  $J$  = 24.2 Hz), 27.99, 23.16, 13.70.

$^{19}\text{F}$  NMR (376 MHz, Chloroform-*d*)  $\delta$  -103.25.

Spectra data was consist with the literature.<sup>6</sup>

### (d) Control experiment

(d) Control experiments

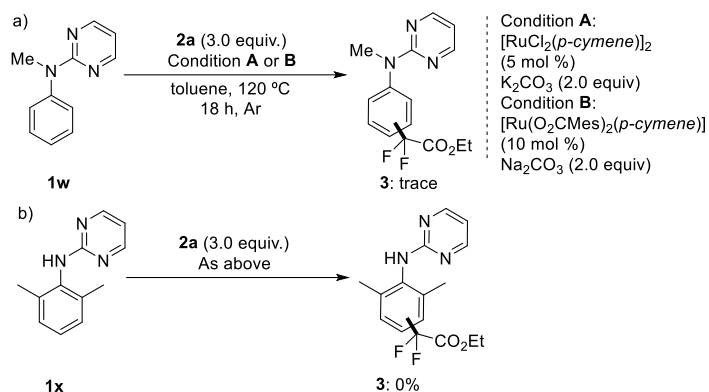

General procedure :

Condition A: **1** (0.2 mmol, 1.0 equiv.), BrCF<sub>2</sub>CO<sub>2</sub>Et (80 μL, 121.8 mg, 3 equiv.), [Ru(O<sub>2</sub>CMe)<sub>2</sub>(*p*-cymene)] (5.6 mg, 10 mol %), Na<sub>2</sub>CO<sub>3</sub> (42.4 mg, 2 equiv.), and toluene (1 mL) were placed in a 10 mL glass tube sealed under argon atmosphere was heated at 120 °C for 18 hours.

Condition B: **1** (0.2 mmol, 1.0 equiv.), BrCF<sub>2</sub>CO<sub>2</sub>Et (80 μL, 121.8 mg, 3 equiv.), [RuCl<sub>2</sub>(*p*-cymene)]<sub>2</sub> (6.1 mg, 5 mol %), K<sub>2</sub>CO<sub>3</sub> (27.8 mg, 2 equiv.), and toluene (1 mL) were placed in a 10 mL glass tube sealed under argon atmosphere was heated at 120 °C for 18 hours.

## 5. Proposed mechanism

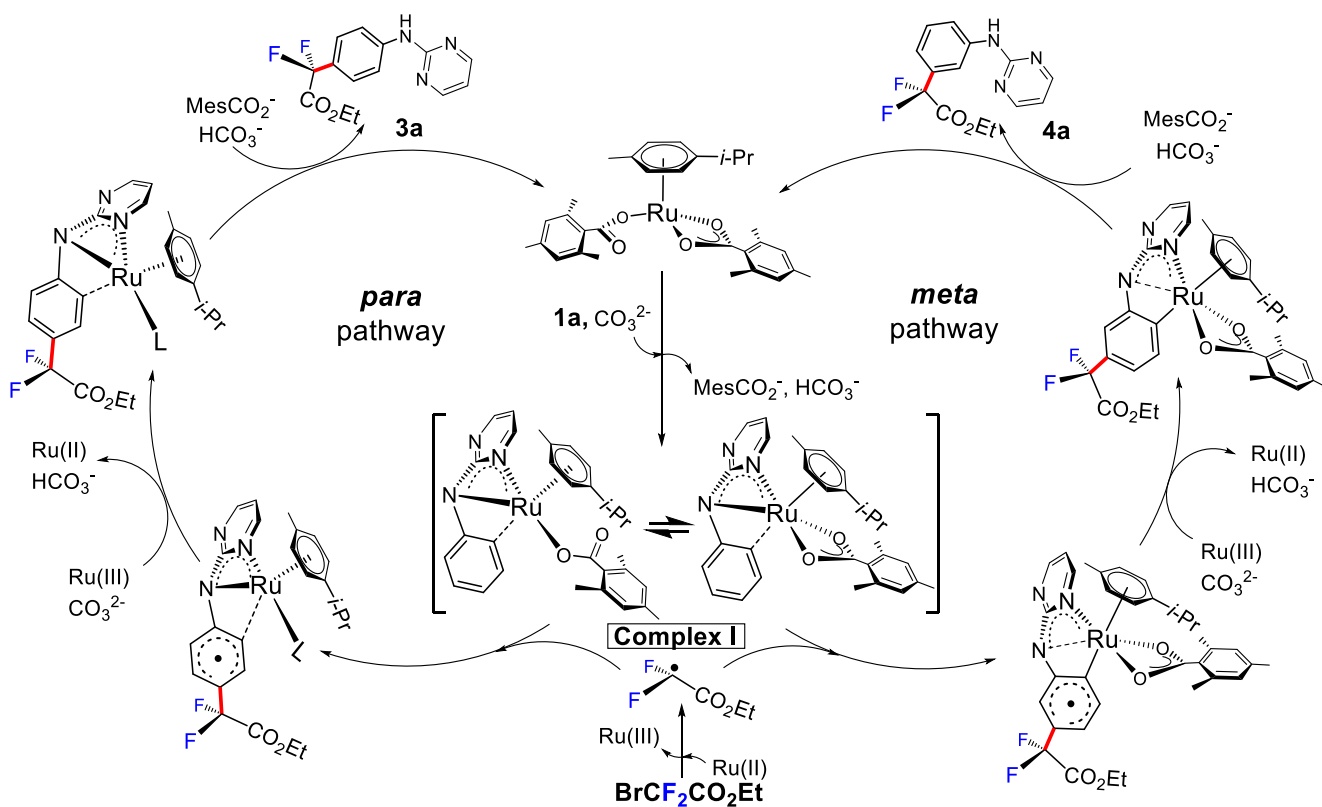

## 6. Computational Data

### a) Computational Methods<sup>7</sup>

The density functional theory (DFT) calculations are performed by Gaussian 09 program. All geometries are optimized at the B<sub>3</sub>LYP level with 6-31G(d) basis set (lanl2dz basis set for Ru). Harmonic frequency calculations are performed for stationary points and transition states. Local minima are confirmed without imaginary frequency. Transition states are verified with one imaginary frequency.

### b) Results

#### Regionselectivity

Based on our experimental finds, we speculated that there are two active Ru intermediate isomers  $A_C$  and  $A_N$  shown in the Figure S1. For  $A_C$ , the carbon atom on the phenyl group bonds to the metal center. While, For  $A_N$ , the nitrogen atom between the phenyl group and pyrimidine group bonds to the metal center.  $A_N$  is 3.6 kcal/mol lower than  $A_C$ . Then, we paid attention to the radical addition step, which is consider as the step that determines the regionselectivity. Both the radical addition of  $\cdot\text{CF}_2\text{CO}_2\text{Et}$  to  $A_C$  and  $A_N$  were taken into account. As shown in Figure S2 and Figure S3, four possible transition states and products were located. Reactant  $B_N$  is lower than the Reactant  $B_C$ .  $\text{TS}_{para\_B_N}$  and  $Para\_B_N$  are the lowest energy transition state and product in respectively. At the same time,  $B_N$ ,  $\text{TS}_{para\_B_N}$  and  $Para\_B_N$  constitute a reaction pathway in Figure S2. It means the radical addition of  $\cdot\text{CF}_2\text{CO}_2\text{Et}$  to the  $A_N$  via transition state  $\text{TS}_{para\_B_N}$  leads to the *para*-product  $Para\_B_N$  kinetically and thermodynamically favorable. This consists with the experimental results.

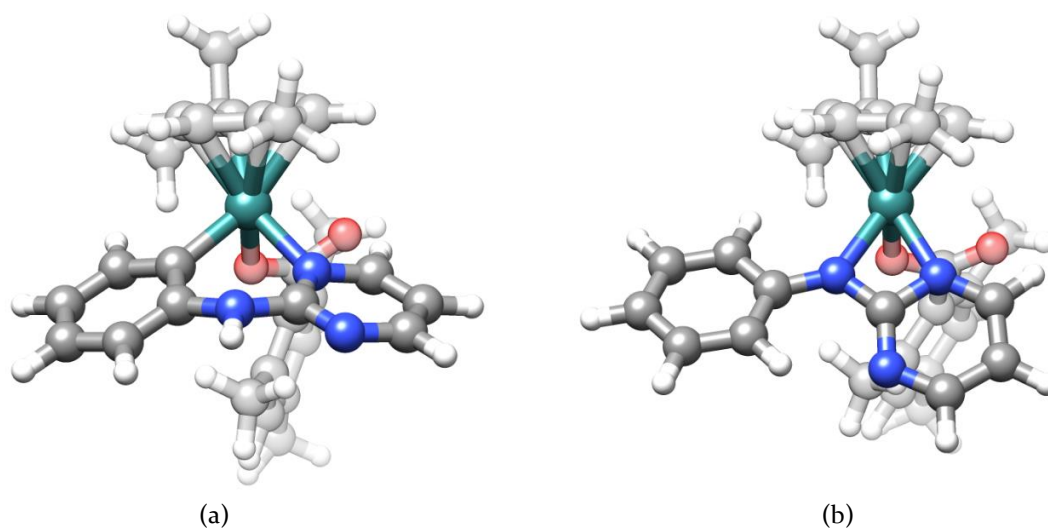

Figure S1. a) Structure of  $A_C$ ; b) Structure of  $A_N$ .

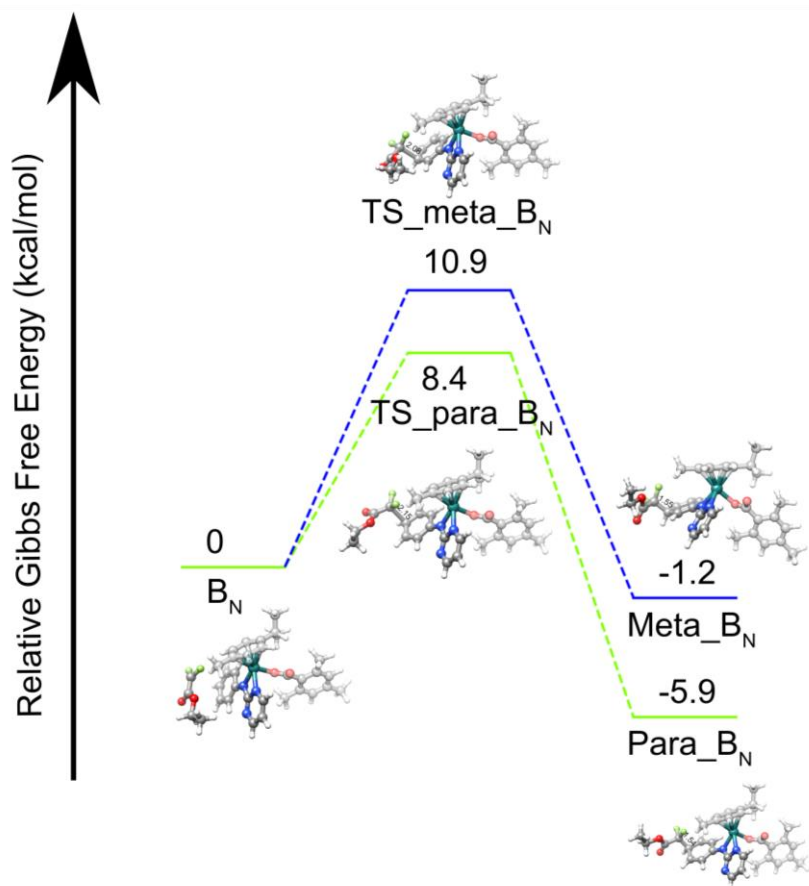

Figure S2. free energy surface of the radical addition of  $\cdot\text{CF}_2\text{CO}_2\text{Et}$  to  $A_N$

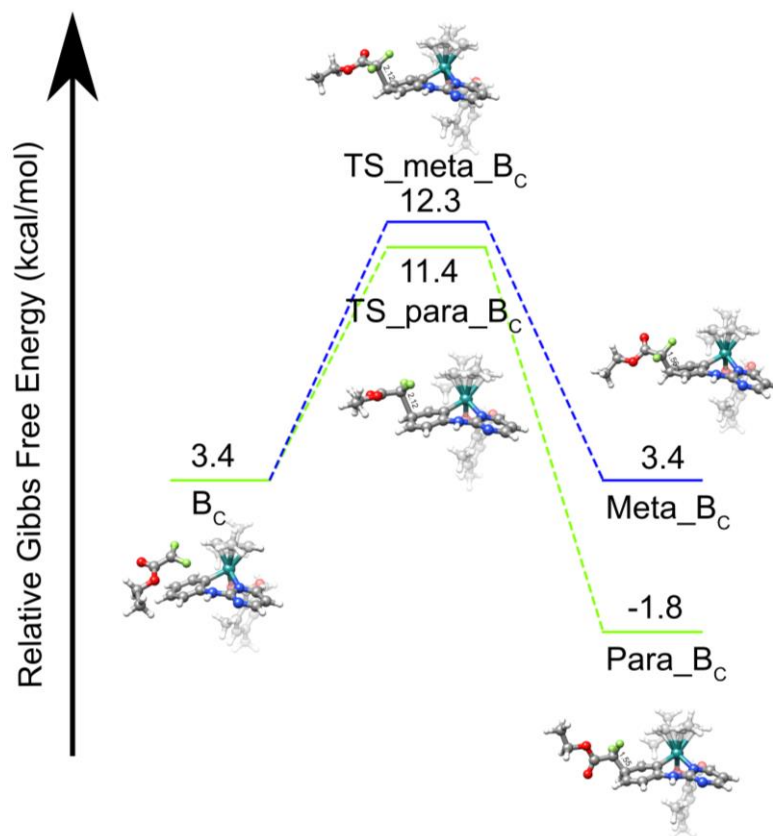

Figure S3. free energy surface of the radical addition of  $\cdot\text{CF}_2\text{CO}_2\text{Et}$  to  $A_C$

## Yield of *meta*-production

The yield of *meta*-production in presence of  $\text{Na}_2\text{CO}_3$  is bigger than the yield in the presence of  $\text{K}_2\text{CO}_3$ . We find the cation can interact with the *Meta*<sub>B<sub>N</sub></sub> forming a more stable structure shown in the Figure S3. The binding energy of  $\text{Na}^+$  is 20.7 kcal/mol bigger than the binding energy of  $\text{K}^+$ . *Meta*<sub>B<sub>N</sub></sub> binding with  $\text{Na}^+$  is more stable intermediate.

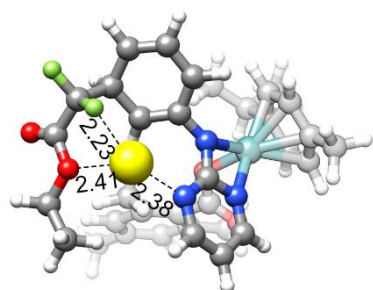

Binding energy: -61.3 kcal/mol

(a)

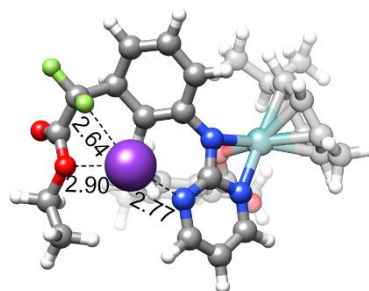

Binding energy: -40.6 kcal/mol

(b)

Figure S4 a) Structure of *Meta*<sub>B<sub>N</sub></sub> binding with  $\text{Na}^+$ ; b) Structure of *Meta*<sub>B<sub>N</sub></sub> binding with  $\text{K}^+$ ,

c) Results Optimized Cartesian coordinates at B<sub>3</sub>LYP/6-31G level of theory

Ac

| Atom | X         | Y        | Z         |
|------|-----------|----------|-----------|
| C    | 0.727400  | 2.793700 | 0.136100  |
| C    | 1.710200  | 2.441300 | 1.085700  |
| C    | 2.912700  | 1.785300 | 0.668300  |
| C    | 3.173700  | 1.528600 | -0.697400 |
| C    | 2.201700  | 1.984200 | -1.658200 |
| C    | 1.021300  | 2.606400 | -1.263100 |
| H    | 1.530400  | 2.585100 | 2.143900  |
| H    | 3.622800  | 1.454600 | 1.419500  |
| H    | 2.370600  | 1.777300 | -2.711900 |
| H    | 0.262200  | 2.847900 | -1.997100 |
| C    | -0.583100 | 3.467600 | 0.512100  |
| H    | -1.308300 | 3.165600 | -0.252800 |
| C    | 4.456700  | 0.879800 | -1.150900 |
| H    | 5.177600  | 1.639200 | -1.482300 |
| H    | 4.918600  | 0.307500 | -0.341400 |
| H    | 4.284400  | 0.201000 | -1.992700 |
| C    | -1.145600 | 3.049000 | 1.877100  |
| H    | -0.498500 | 3.368000 | 2.703600  |
| H    | -2.121900 | 3.521400 | 2.033600  |

|   |           |           |           |
|---|-----------|-----------|-----------|
| H | -1.279000 | 1.964800  | 1.928100  |
| C | -0.412000 | 4.999700  | 0.422200  |
| H | -0.050500 | 5.309900  | -0.564800 |
| H | -1.370600 | 5.499000  | 0.603300  |
| H | 0.303700  | 5.359000  | 1.171700  |
| u | 1.209100  | 0.525000  | -0.047000 |
| C | -4.575500 | -2.008300 | 0.505700  |
| C | -3.273300 | -1.575500 | 0.225700  |
| C | -3.089200 | -0.322000 | -0.401600 |
| C | -4.216000 | 0.466800  | -0.735800 |
| C | -5.493300 | -0.000300 | -0.412300 |
| C | -5.698600 | -1.237600 | 0.204100  |
| H | -4.711300 | -2.978600 | 0.979800  |
| H | -6.353800 | 0.620900  | -0.655200 |
| C | -2.126500 | -2.491300 | 0.599100  |
| H | -1.556700 | -2.097300 | 1.445200  |
| H | -2.508000 | -3.483400 | 0.864400  |
| H | -1.412400 | -2.609300 | -0.222300 |
| C | -7.093600 | -1.733500 | 0.507600  |
| H | -7.578800 | -2.138700 | -0.390800 |
| H | -7.080400 | -2.530200 | 1.259000  |
| H | -7.734300 | -0.926400 | 0.881500  |
| C | -4.098800 | 1.811700  | -1.420600 |
| H | -3.655100 | 1.712500  | -2.414200 |
| H | -5.085400 | 2.278200  | -1.512700 |
| H | -3.453800 | 2.499800  | -0.861300 |
| C | -1.698000 | 0.178400  | -0.742700 |
| O | -1.475300 | 0.721900  | -1.839800 |
| O | -0.821400 | -0.013800 | 0.193700  |
| N | 2.807400  | -2.360400 | 0.286900  |
| H | 3.406900  | -3.173700 | 0.354700  |
| C | 2.256000  | -1.886600 | 1.507700  |
| C | 1.476500  | -0.717900 | 1.567900  |
| C | 2.537800  | -2.650900 | 2.651000  |
| C | 0.938800  | -0.398200 | 2.826100  |
| C | 2.018700  | -2.281400 | 3.888200  |
| H | 3.153800  | -3.545100 | 2.562800  |

|   |          |           |           |
|---|----------|-----------|-----------|
| C | 1.201300 | -1.153500 | 3.972600  |
| H | 0.293100 | 0.470900  | 2.912900  |
| H | 2.239300 | -2.877700 | 4.769200  |
| H | 0.768700 | -0.860200 | 4.926100  |
| C | 2.302100 | -2.219500 | -0.965000 |
| C | 2.200400 | -3.080200 | -3.079700 |
| C | 0.869400 | -1.218100 | -2.474600 |
| C | 1.213100 | -2.155900 | -3.435700 |
| H | 2.568200 | -3.816200 | -3.793100 |
| H | 0.127600 | -0.441100 | -2.640600 |
| H | 0.749500 | -2.151100 | -4.414800 |
| N | 1.439000 | -1.210300 | -1.248100 |
| N | 2.734900 | -3.128000 | -1.866100 |

A<sub>N</sub>

| Atom | X         | Y        | Z         |
|------|-----------|----------|-----------|
| C    | -0.605900 | 2.770500 | -0.789100 |
| C    | -1.798000 | 2.229900 | -1.317200 |
| C    | -2.902900 | 1.914700 | -0.458100 |
| C    | -2.872400 | 2.184800 | 0.929200  |
| C    | -1.637700 | 2.696100 | 1.455200  |
| C    | -0.537700 | 3.004500 | 0.624400  |
| H    | -1.868300 | 1.987400 | -2.369800 |
| H    | -3.772200 | 1.424700 | -0.885700 |
| H    | -1.530300 | 2.810200 | 2.529900  |
| H    | 0.399800  | 3.307500 | 1.073400  |
| C    | 0.600300  | 3.091900 | -1.655400 |
| H    | 1.476800  | 3.032600 | -0.998600 |
| C    | -4.047700 | 1.899300 | 1.826300  |
| H    | -4.641900 | 2.809100 | 1.983000  |
| H    | -4.703900 | 1.140600 | 1.389700  |
| H    | -3.720000 | 1.543000 | 2.808100  |
| C    | 0.824800  | 2.106800 | -2.811600 |
| H    | 0.020200  | 2.155600 | -3.555800 |
| H    | 1.756900  | 2.357200 | -3.330000 |
| H    | 0.903800  | 1.082900 | -2.436100 |
| C    | 0.486800  | 4.546400 | -2.160500 |

|    |           |           |           |
|----|-----------|-----------|-----------|
| H  | 0.373200  | 5.255600  | -1.332700 |
| H  | 1.386900  | 4.821300  | -2.721500 |
| H  | -0.376000 | 4.664000  | -2.827100 |
| Ru | -1.122400 | 0.830000  | 0.359900  |
| C  | 4.391500  | -2.155000 | -0.583600 |
| C  | 3.150900  | -1.641900 | -0.190400 |
| C  | 3.079800  | -0.306600 | 0.270600  |
| C  | 4.252300  | 0.481300  | 0.327500  |
| C  | 5.464000  | -0.072100 | -0.100900 |
| C  | 5.559400  | -1.388900 | -0.554300 |
| H  | 4.442700  | -3.186300 | -0.928300 |
| H  | 6.359900  | 0.545500  | -0.072600 |
| C  | 1.945700  | -2.555400 | -0.259400 |
| H  | 1.245600  | -2.242100 | -1.038700 |
| H  | 2.261800  | -3.583000 | -0.467600 |
| H  | 1.381400  | -2.561200 | 0.678800  |
| C  | 6.886600  | -1.978100 | -0.973000 |
| H  | 7.339400  | -2.560300 | -0.158800 |
| H  | 6.774100  | -2.654700 | -1.827800 |
| H  | 7.602200  | -1.196900 | -1.251200 |
| C  | 4.255700  | 1.909900  | 0.828500  |
| H  | 4.045400  | 1.952600  | 1.900700  |
| H  | 5.228000  | 2.376800  | 0.638400  |
| H  | 3.485700  | 2.520200  | 0.342700  |
| C  | 1.767000  | 0.301700  | 0.720900  |
| O  | 1.704600  | 0.998900  | 1.740100  |
| O  | 0.763700  | 0.039400  | -0.075800 |
| N  | -1.821700 | -1.165100 | 0.009400  |
| C  | -2.324200 | -1.890600 | -1.072500 |
| C  | -2.995400 | -3.125500 | -0.939100 |
| C  | -2.185000 | -1.344600 | -2.363200 |
| C  | -3.507900 | -3.768900 | -2.064200 |
| H  | -3.093800 | -3.572600 | 0.041300  |
| C  | -2.701500 | -1.999200 | -3.478900 |
| H  | -1.643300 | -0.411100 | -2.475200 |
| C  | -3.372000 | -3.216300 | -3.339800 |
| H  | -4.021700 | -4.719000 | -1.937200 |



|   |           |           |           |
|---|-----------|-----------|-----------|
| H | -2.572200 | -1.556700 | -4.463900 |
| H | -3.775700 | -3.727300 | -4.209400 |
| C | -1.542200 | -1.602000 | 1.240600  |
| C | -0.616200 | -0.685800 | 3.192800  |
| C | -1.234900 | -2.976600 | 3.021400  |
| C | -0.701600 | -1.939200 | 3.797900  |
| H | -0.184500 | 0.182900  | 3.678700  |
| H | -1.326700 | -3.977800 | 3.441700  |
| H | -0.362500 | -2.101700 | 4.813700  |
| N | -1.643400 | -2.843100 | 1.759500  |
| N | -1.069200 | -0.519700 | 1.955600  |

### B<sub>N</sub>

| Atom | X         | Y        | Z         |
|------|-----------|----------|-----------|
| C    | 1.240900  | 3.072700 | -0.298600 |
| C    | 0.014400  | 2.864100 | -0.978400 |
| C    | -1.196800 | 2.663200 | -0.245700 |
| C    | -1.242500 | 2.725900 | 1.170800  |
| C    | 0.014300  | 2.890700 | 1.834600  |
| C    | 1.227700  | 3.092500 | 1.127900  |
| H    | -0.003900 | 2.787600 | -2.058000 |
| H    | -2.100800 | 2.415200 | -0.791000 |
| H    | 0.046500  | 2.825300 | 2.918600  |
| H    | 2.162500  | 3.140200 | 1.672100  |
| C    | 2.559500  | 3.252900 | -1.030600 |
| H    | 3.335400  | 2.867000 | -0.358600 |
| C    | -2.527800 | 2.544100 | 1.935200  |
| H    | -2.997200 | 3.515700 | 2.139000  |
| H    | -3.239300 | 1.935600 | 1.370800  |
| H    | -2.345200 | 2.053900 | 2.896900  |
| C    | 2.656100  | 2.475300 | -2.351300 |
| H    | 1.971900  | 2.872300 | -3.111500 |
| H    | 3.670600  | 2.564200 | -2.755000 |
| H    | 2.439100  | 1.415200 | -2.193700 |
| C    | 2.819500  | 4.760300 | -1.240800 |
| H    | 2.803000  | 5.310800 | -0.293400 |
| H    | 3.801100  | 4.910700 | -1.703700 |

|    |           |           |           |
|----|-----------|-----------|-----------|
| H  | 2.063400  | 5.200700  | -1.901900 |
| Ru | 0.254000  | 1.135700  | 0.500000  |
| C  | 4.779400  | -3.020600 | -1.047300 |
| C  | 3.734200  | -2.223000 | -0.566900 |
| C  | 4.041000  | -0.966600 | 0.006300  |
| C  | 5.388400  | -0.539500 | 0.079600  |
| C  | 6.392300  | -1.364600 | -0.437200 |
| C  | 6.113500  | -2.612800 | -0.998200 |
| H  | 4.537800  | -3.991200 | -1.476600 |
| H  | 7.424500  | -1.021600 | -0.392200 |
| C  | 2.324800  | -2.767100 | -0.667100 |
| H  | 1.717100  | -2.189500 | -1.368400 |
| H  | 2.346400  | -3.810300 | -0.999200 |
| H  | 1.803200  | -2.732300 | 0.294900  |
| C  | 7.222600  | -3.504800 | -1.505400 |
| H  | 7.611900  | -4.150400 | -0.706100 |
| H  | 6.874000  | -4.161200 | -2.310300 |
| H  | 8.066400  | -2.919000 | -1.886600 |
| C  | 5.799600  | 0.784400  | 0.688500  |
| H  | 5.587900  | 0.809900  | 1.760400  |
| H  | 6.869500  | 0.957500  | 0.531100  |
| H  | 5.254200  | 1.627000  | 0.247700  |
| C  | 2.955200  | -0.074400 | 0.574500  |
| O  | 3.126100  | 0.532100  | 1.639200  |
| O  | 1.878100  | -0.006700 | -0.164200 |
| N  | -0.915300 | -0.600900 | 0.024100  |
| C  | -1.630900 | -1.063200 | -1.080000 |
| C  | -2.483000 | -2.189900 | -1.051000 |
| C  | -1.520600 | -0.346800 | -2.288300 |
| C  | -3.200100 | -2.557100 | -2.189700 |
| H  | -2.561300 | -2.770800 | -0.141700 |
| C  | -2.241700 | -0.725500 | -3.418100 |
| H  | -0.843900 | 0.500400  | -2.328100 |
| C  | -3.095100 | -1.830500 | -3.378200 |
| H  | -3.856200 | -3.422500 | -2.141500 |
| H  | -2.132300 | -0.153300 | -4.336300 |
| H  | -3.663300 | -2.123300 | -4.256200 |

|   |           |           |           |
|---|-----------|-----------|-----------|
| C | -0.677000 | -1.220300 | 1.183200  |
| C | 0.572800  | -0.767400 | 3.118100  |
| C | -0.609600 | -2.807800 | 2.809200  |
| C | 0.221200  | -2.022300 | 3.617000  |
| H | 1.236400  | -0.083300 | 3.636700  |
| H | -0.924800 | -3.793800 | 3.149800  |
| H | 0.578900  | -2.370000 | 4.578400  |
| N | -1.058800 | -2.444500 | 1.605900  |
| N | 0.095500  | -0.367300 | 1.946300  |
| C | -5.667600 | -0.645400 | -0.554700 |
| O | -6.442900 | -1.475800 | -0.993500 |
| O | -5.174600 | -0.600100 | 0.700300  |
| C | -5.220000 | 0.499500  | -1.330800 |
| C | -5.602200 | -1.679700 | 1.565900  |
| C | -4.814200 | -1.570800 | 2.856800  |
| H | -5.422300 | -2.629500 | 1.054600  |
| H | -6.681500 | -1.585700 | 1.729100  |
| H | -5.137400 | -2.354700 | 3.550700  |
| H | -3.743800 | -1.697100 | 2.667300  |
| H | -4.976900 | -0.599800 | 3.336300  |
| F | -4.236500 | 1.290900  | -0.922300 |
| F | -5.405500 | 0.533100  | -2.630100 |

#### TS\_meta\_B<sub>N</sub>

| Atom | X         | Y        | Z         |
|------|-----------|----------|-----------|
| C    | -1.270800 | 3.025900 | 0.251600  |
| C    | -0.116000 | 2.771300 | 1.041000  |
| C    | 1.138100  | 2.490200 | 0.418700  |
| C    | 1.305100  | 2.508000 | -0.991500 |
| C    | 0.118400  | 2.712600 | -1.762200 |
| C    | -1.138300 | 3.006500 | -1.166200 |
| H    | -0.191600 | 2.717800 | 2.119300  |
| H    | 1.979700  | 2.201300 | 1.041500  |
| H    | 0.172800  | 2.612800 | -2.842700 |
| H    | -2.020300 | 3.092900 | -1.788300 |
| C    | -2.634300 | 3.296000 | 0.864200  |
| H    | -3.369500 | 2.891800 | 0.157800  |

|   |           |           |           |
|---|-----------|-----------|-----------|
| C | 2.641200  | 2.237400  | -1.632400 |
| H | 3.172700  | 3.178600  | -1.826200 |
| H | 3.273800  | 1.620000  | -0.987800 |
| H | 2.519800  | 1.720400  | -2.589800 |
| C | -2.862200 | 2.612600  | 2.220200  |
| H | -2.223000 | 3.036600  | 3.004500  |
| H | -3.900200 | 2.764200  | 2.535700  |
| H | -2.677400 | 1.537000  | 2.150700  |
| C | -2.852700 | 4.821700  | 0.959500  |
| H | -2.747700 | 5.308800  | -0.016400 |
| H | -3.859000 | 5.033500  | 1.337800  |
| H | -2.130900 | 5.280100  | 1.646300  |
| u | -0.321600 | 1.021200  | -0.399400 |
| C | -4.989900 | -3.022000 | 0.990700  |
| C | -3.914900 | -2.247700 | 0.539700  |
| C | -4.174600 | -0.970900 | -0.009200 |
| C | -5.506100 | -0.502100 | -0.096300 |
| C | -6.542700 | -1.305300 | 0.390000  |
| C | -6.309500 | -2.568500 | 0.938400  |
| H | -4.785100 | -4.011500 | 1.395600  |
| H | -7.564000 | -0.933600 | 0.328500  |
| C | -2.523100 | -2.836400 | 0.630700  |
| H | -1.892900 | -2.277900 | 1.327500  |
| H | -2.573700 | -3.879400 | 0.960300  |
| H | -2.009100 | -2.816300 | -0.336500 |
| C | -7.445700 | -3.408200 | 1.474200  |
| H | -7.629500 | -3.199300 | 2.537100  |
| H | -8.380400 | -3.207500 | 0.939000  |
| H | -7.228700 | -4.478600 | 1.388200  |
| C | -5.861500 | 0.841800  | -0.695500 |
| H | -5.592600 | 0.886700  | -1.753700 |
| H | -6.934500 | 1.033700  | -0.589800 |
| H | -5.325500 | 1.662800  | -0.204200 |
| C | -3.049600 | -0.107800 | -0.546400 |
| O | -3.158300 | 0.475300  | -1.631900 |
| O | -2.009000 | -0.041000 | 0.242300  |
| N | 0.782300  | -0.710700 | 0.173600  |

|   |           |           |           |
|---|-----------|-----------|-----------|
| C | 1.652200  | -0.995000 | 1.222800  |
| C | 2.797200  | -1.783400 | 1.091600  |
| C | 1.372100  | -0.403000 | 2.479300  |
| C | 3.762000  | -1.832000 | 2.145400  |
| H | 2.994900  | -2.286900 | 0.154500  |
| C | 2.233100  | -0.585300 | 3.567700  |
| H | 0.455100  | 0.168200  | 2.585100  |
| C | 3.403400  | -1.312900 | 3.432500  |
| H | 4.509200  | -2.624000 | 2.113000  |
| H | 1.966600  | -0.159800 | 4.532200  |
| H | 4.080600  | -1.442200 | 4.270200  |
| C | 0.626300  | -1.354400 | -0.985800 |
| C | -0.583700 | -1.003400 | -2.962200 |
| C | 0.679900  | -2.981700 | -2.565200 |
| C | -0.173300 | -2.260400 | -3.409700 |
| H | -1.254300 | -0.358100 | -3.520500 |
| H | 1.051800  | -3.958500 | -2.873500 |
| H | -0.495600 | -2.653100 | -4.366200 |
| N | 1.086200  | -2.564200 | -1.363600 |
| N | -0.151000 | -0.548700 | -1.792600 |
| C | 5.884900  | -1.004100 | 0.380500  |
| O | 6.825300  | -1.763600 | 0.505700  |
| O | 5.270600  | -0.706900 | -0.782700 |
| C | 5.164100  | -0.414900 | 1.541100  |
| C | 5.786200  | -1.391400 | -1.950700 |
| C | 4.817000  | -1.143900 | -3.091000 |
| H | 5.886600  | -2.455200 | -1.716900 |
| H | 6.786800  | -1.002300 | -2.167400 |
| H | 5.176500  | -1.644600 | -3.996800 |
| H | 3.824600  | -1.537000 | -2.847700 |
| H | 4.726000  | -0.073700 | -3.303800 |
| F | 4.462500  | 0.706800  | 1.289200  |
| F | 5.946500  | -0.235100 | 2.612300  |

Meta\_B<sub>N</sub>

| Atom | X        | Y        | Z         |
|------|----------|----------|-----------|
| C    | 1.622100 | 3.049500 | -0.478700 |

|    |           |           |           |
|----|-----------|-----------|-----------|
| C  | 0.607700  | 2.707700  | -1.428100 |
| C  | -0.741100 | 2.551500  | -1.016700 |
| C  | -1.155600 | 2.760300  | 0.333600  |
| C  | -0.120100 | 3.029800  | 1.269800  |
| C  | 1.241100  | 3.213800  | 0.874200  |
| H  | 0.871400  | 2.504200  | -2.457700 |
| H  | -1.473700 | 2.209600  | -1.741700 |
| H  | -0.368100 | 3.077100  | 2.326500  |
| H  | 2.001500  | 3.375900  | 1.628700  |
| C  | 3.080400  | 3.222200  | -0.868700 |
| H  | 3.664700  | 2.837700  | -0.024800 |
| C  | -2.599300 | 2.620200  | 0.741300  |
| H  | -3.125000 | 3.577000  | 0.622800  |
| H  | -3.121500 | 1.876200  | 0.131500  |
| H  | -2.684700 | 2.323100  | 1.791600  |
| C  | 3.494300  | 2.441700  | -2.124900 |
| H  | 3.024300  | 2.846600  | -3.030000 |
| H  | 4.578000  | 2.521100  | -2.264200 |
| H  | 3.237400  | 1.382500  | -2.036800 |
| C  | 3.388300  | 4.727400  | -1.025800 |
| H  | 3.155100  | 5.287300  | -0.113400 |
| H  | 4.451200  | 4.871600  | -1.249800 |
| H  | 2.808800  | 5.163900  | -1.848500 |
| Ru | 0.470600  | 1.160600  | 0.231200  |
| C  | 4.852600  | -3.324400 | -0.604200 |
| C  | 3.832400  | -2.429300 | -0.262800 |
| C  | 4.179700  | -1.125900 | 0.164300  |
| C  | 5.543200  | -0.754700 | 0.242700  |
| C  | 6.522700  | -1.680500 | -0.131600 |
| C  | 6.202700  | -2.972500 | -0.553100 |
| H  | 4.579000  | -4.328500 | -0.923200 |
| H  | 7.568300  | -1.381300 | -0.085800 |
| C  | 2.402400  | -2.919400 | -0.345700 |
| H  | 1.844300  | -2.408000 | -1.134200 |
| H  | 2.383400  | -3.996300 | -0.543700 |
| H  | 1.854800  | -2.739900 | 0.585400  |
| C  | 7.283000  | -3.966900 | -0.910200 |

H 7.584100 -4.560000 -0.035700  
H 6.942600 -4.672000 -1.676700  
H 8.181700 -3.465100 -1.285600  
C 5.997800 0.612900 0.706100  
H 5.715300 0.792500 1.746200  
H 7.084900 0.703800 0.609300  
H 5.540700 1.417000 0.118100  
C 3.115700 -0.121600 0.564300  
O 3.265600 0.603000 1.556600  
O 2.082200 -0.095200 -0.235000  
N -0.738800 -0.566200 -0.061800  
C -1.674300 -0.933400 -1.031100  
C -2.893300 -1.500200 -0.733500  
C -1.334300 -0.652300 -2.391400  
C -3.945500 -1.736900 -1.780300  
H -3.124800 -1.769800 0.290400  
C -2.240200 -0.953900 -3.432700  
H -0.349700 -0.250800 -2.606400  
C -3.480700 -1.472500 -3.184200  
H -4.335900 -2.766500 -1.700400  
H -1.932600 -0.773700 -4.460500  
H -4.172800 -1.684600 -3.992200  
C -0.604900 -1.035100 1.181600  
C 0.646000 -0.465500 3.079100  
C -0.729400 -2.406800 2.981700  
C 0.170500 -1.616200 3.708900  
H 1.358000 0.215400 3.533700  
H -1.150200 -3.305600 3.431800  
H 0.480300 -1.880200 4.712700  
N -1.124800 -2.148700 1.733900  
N 0.225500 -0.164400 1.855700  
C -5.837200 -1.222100 -0.115800  
O -6.263500 -2.332700 0.105600  
O -5.841200 -0.199800 0.745300  
C -5.191600 -0.861000 -1.468000  
C -6.424200 -0.481700 2.044700  
C -6.339600 0.789900 2.866300

|   |           |           |           |
|---|-----------|-----------|-----------|
| H | -5.871000 | -1.309000 | 2.499800  |
| H | -7.456900 | -0.811800 | 1.896400  |
| H | -6.773300 | 0.618000  | 3.857500  |
| H | -5.298700 | 1.103700  | 2.995600  |
| H | -6.890000 | 1.604400  | 2.385000  |
| F | -4.870700 | 0.464800  | -1.511300 |
| F | -6.150500 | -1.073800 | -2.425100 |

TS\_para\_B<sub>N</sub>

| Atom | X         | Y         | Z         |
|------|-----------|-----------|-----------|
| C    | -1.418600 | 2.930800  | 0.267700  |
| C    | -0.159300 | 2.589000  | 0.827700  |
| C    | 0.969600  | 2.350400  | -0.014700 |
| C    | 0.901500  | 2.490400  | -1.425000 |
| C    | -0.391500 | 2.768600  | -1.969800 |
| C    | -1.524400 | 3.022100  | -1.150400 |
| H    | -0.056900 | 2.446800  | 1.895700  |
| H    | 1.896500  | 2.005400  | 0.434200  |
| H    | -0.518400 | 2.762700  | -3.048900 |
| H    | -2.494300 | 3.171900  | -1.607900 |
| C    | -2.647800 | 3.184700  | 1.123500  |
| H    | -3.512800 | 2.899100  | 0.512700  |
| C    | 2.109300  | 2.271700  | -2.298000 |
| H    | 2.604400  | 3.226700  | -2.517700 |
| H    | 2.837400  | 1.623500  | -1.801400 |
| H    | 1.831900  | 1.812700  | -3.252400 |
| C    | -2.697000 | 2.362800  | 2.419500  |
| H    | -1.911700 | 2.662700  | 3.124200  |
| H    | -3.657300 | 2.527800  | 2.920400  |
| H    | -2.598200 | 1.294700  | 2.208100  |
| C    | -2.752100 | 4.698600  | 1.412000  |
| H    | -2.772200 | 5.287300  | 0.488200  |
| H    | -3.670500 | 4.911000  | 1.970400  |
| H    | -1.903300 | 5.043100  | 2.014900  |
| u    | -0.646700 | 0.970100  | -0.702400 |
| C    | -5.250500 | -2.909400 | 1.258900  |
| C    | -4.210300 | -2.186100 | 0.665200  |



|   |           |           |           |
|---|-----------|-----------|-----------|
| C | -4.487400 | -0.907600 | 0.125900  |
| C | -5.801100 | -0.386900 | 0.194500  |
| C | -6.799300 | -1.141200 | 0.820600  |
| C | -6.550000 | -2.406900 | 1.354500  |
| H | -5.033300 | -3.896800 | 1.662700  |
| H | -7.803400 | -0.726200 | 0.886200  |
| C | -2.839900 | -2.827800 | 0.612900  |
| H | -2.122400 | -2.299500 | 1.246200  |
| H | -2.898900 | -3.870100 | 0.943600  |
| H | -2.421900 | -2.819900 | -0.399300 |
| C | -7.655000 | -3.219600 | 1.988300  |
| H | -8.110500 | -3.907600 | 1.262900  |
| H | -7.280100 | -3.828700 | 2.818400  |
| H | -8.455000 | -2.577800 | 2.373000  |
| C | -6.181500 | 0.963700  | -0.374200 |
| H | -6.095100 | 0.972600  | -1.463800 |
| H | -7.210300 | 1.215900  | -0.096000 |
| H | -5.527400 | 1.763700  | -0.009000 |
| C | -3.405900 | -0.084500 | -0.544700 |
| O | -3.637500 | 0.546500  | -1.582800 |
| O | -2.260200 | -0.097800 | 0.086400  |
| N | 0.464700  | -0.835500 | -0.434800 |
| C | 1.475500  | -1.219400 | 0.421500  |
| C | 2.538900  | -2.087400 | 0.052900  |
| C | 1.484700  | -0.663600 | 1.726600  |
| C | 3.612300  | -2.266400 | 0.899400  |
| H | 2.491100  | -2.603700 | -0.897900 |
| C | 2.550700  | -0.857800 | 2.578200  |
| H | 0.616200  | -0.093500 | 2.043000  |
| C | 3.721200  | -1.539500 | 2.125100  |
| H | 4.424500  | -2.922200 | 0.597400  |
| H | 2.537400  | -0.426000 | 3.574400  |
| H | 4.456700  | -1.856200 | 2.860700  |
| C | 0.089300  | -1.387300 | -1.599200 |
| C | -1.359900 | -0.821100 | -3.348100 |
| C | -0.197900 | -2.898500 | -3.263700 |
| C | -1.099600 | -2.061400 | -3.932800 |

|   |           |           |           |
|---|-----------|-----------|-----------|
| H | -2.059100 | -0.100700 | -3.759200 |
| H | 0.052800  | -3.873400 | -3.680100 |
| H | -1.576200 | -2.360300 | -4.858400 |
| N | 0.394500  | -2.595500 | -2.106500 |
| N | -0.739000 | -0.482000 | -2.224100 |
| C | 6.285700  | -0.320300 | 1.319100  |
| O | 7.113300  | -0.525700 | 2.188200  |
| O | 6.427400  | -0.647900 | 0.015700  |
| C | 4.921200  | 0.170500  | 1.602300  |
| C | 7.678700  | -1.284800 | -0.327800 |
| C | 7.624300  | -1.626600 | -1.805100 |
| H | 7.806900  | -2.174200 | 0.297800  |
| H | 8.499400  | -0.598200 | -0.095200 |
| H | 8.559100  | -2.110400 | -2.109000 |
| H | 6.796200  | -2.310200 | -2.018100 |
| H | 7.489900  | -0.724400 | -2.410400 |
| F | 4.263900  | 0.748100  | 0.575900  |
| F | 4.832000  | 0.943000  | 2.694300  |

Para\_B<sub>N</sub>

| Atom | X         | Y        | Z         |
|------|-----------|----------|-----------|
| C    | 1.234200  | 2.985600 | -0.359000 |
| C    | 0.063900  | 2.499800 | -1.018100 |
| C    | -1.105500 | 2.184500 | -0.274100 |
| C    | -1.179200 | 2.368700 | 1.137000  |
| C    | 0.022500  | 2.781100 | 1.779700  |
| C    | 1.198700  | 3.128300 | 1.050400  |
| H    | 0.075700  | 2.312800 | -2.083900 |
| H    | -1.954000 | 1.740600 | -0.787000 |
| H    | 0.050400  | 2.818000 | 2.865200  |
| H    | 2.101300  | 3.400400 | 1.584200  |
| C    | 2.504800  | 3.340900 | -1.111700 |
| H    | 3.335500  | 3.100300 | -0.438200 |
| C    | -2.439900 | 2.060900 | 1.902400  |
| H    | -3.052900 | 2.965100 | 2.012500  |
| H    | -3.042600 | 1.312100 | 1.380000  |
| H    | -2.214200 | 1.686900 | 2.906400  |

|    |           |           |           |
|----|-----------|-----------|-----------|
| C  | 2.707700  | 2.551900  | -2.413900 |
| H  | 1.968600  | 2.826800  | -3.176700 |
| H  | 3.695700  | 2.779100  | -2.829000 |
| H  | 2.648500  | 1.474400  | -2.236400 |
| C  | 2.525800  | 4.862900  | -1.374600 |
| H  | 2.440200  | 5.436500  | -0.445000 |
| H  | 3.465000  | 5.146000  | -1.862800 |
| H  | 1.700700  | 5.160000  | -2.033300 |
| Ru | 0.555100  | 0.976700  | 0.602500  |
| C  | 5.222100  | -2.923000 | -1.138800 |
| C  | 4.194100  | -2.158600 | -0.574000 |
| C  | 4.436600  | -0.797600 | -0.279200 |
| C  | 5.706700  | -0.236700 | -0.551600 |
| C  | 6.692000  | -1.037100 | -1.137700 |
| C  | 6.474800  | -2.384600 | -1.436000 |
| H  | 5.031900  | -3.972600 | -1.355400 |
| H  | 7.660500  | -0.593300 | -1.361700 |
| C  | 2.876100  | -2.842700 | -0.280600 |
| H  | 2.067000  | -2.443800 | -0.897500 |
| H  | 2.959200  | -3.919300 | -0.462400 |
| H  | 2.570100  | -2.703100 | 0.761900  |
| C  | 7.571600  | -3.236300 | -2.032000 |
| H  | 8.262100  | -3.597500 | -1.257700 |
| H  | 7.163900  | -4.116200 | -2.540900 |
| H  | 8.169200  | -2.672000 | -2.757300 |
| C  | 6.046000  | 1.206200  | -0.244400 |
| H  | 5.990500  | 1.405500  | 0.828700  |
| H  | 7.053600  | 1.443800  | -0.601200 |
| H  | 5.347900  | 1.900900  | -0.726100 |
| C  | 3.363300  | 0.070300  | 0.350400  |
| O  | 3.628100  | 0.828600  | 1.291100  |
| O  | 2.187900  | -0.056000 | -0.206400 |
| N  | -0.444900 | -0.907000 | 0.505600  |
| C  | -1.492300 | -1.364600 | -0.253300 |
| C  | -2.561400 | -2.179000 | 0.253500  |
| C  | -1.553400 | -0.960700 | -1.629300 |
| C  | -3.693800 | -2.380500 | -0.470900 |

|   |           |           |           |
|---|-----------|-----------|-----------|
| H | -2.434800 | -2.654100 | 1.220100  |
| C | -2.660100 | -1.153800 | -2.390700 |
| H | -0.658200 | -0.516700 | -2.057900 |
| C | -3.934800 | -1.693800 | -1.793600 |
| H | -4.480000 | -3.027700 | -0.091600 |
| H | -2.671500 | -0.867300 | -3.437700 |
| H | -4.436900 | -2.379900 | -2.490300 |
| C | -0.000600 | -1.346800 | 1.693700  |
| C | 1.495400  | -0.594800 | 3.327800  |
| C | 0.411400  | -2.714200 | 3.452400  |
| C | 1.312600  | -1.798500 | 4.012700  |
| H | 2.177600  | 0.182200  | 3.656900  |
| H | 0.214900  | -3.661100 | 3.954100  |
| H | 1.841700  | -2.009900 | 4.933800  |
| N | -0.244700 | -2.521000 | 2.307000  |
| N | 0.816900  | -0.365000 | 2.210400  |
| C | -6.321400 | -0.993200 | -1.099100 |
| O | -6.837500 | -2.023200 | -1.473000 |
| O | -6.857700 | -0.123000 | -0.240600 |
| C | -4.945500 | -0.532500 | -1.622600 |
| C | -8.178600 | -0.463000 | 0.256900  |
| C | -8.607000 | 0.644400  | 1.199800  |
| H | -8.119900 | -1.435100 | 0.756100  |
| H | -8.854300 | -0.566500 | -0.597700 |
| H | -9.603700 | 0.424700  | 1.597600  |
| H | -7.911800 | 0.733700  | 2.040500  |
| H | -8.647200 | 1.606900  | 0.680100  |
| F | -4.432900 | 0.441400  | -0.809800 |
| F | -5.179400 | 0.057100  | -2.843300 |

B<sub>c</sub>

| Atom | X         | Y         | Z         |
|------|-----------|-----------|-----------|
| C    | -1.294800 | -2.851100 | -0.920100 |
| C    | 0.016900  | -2.629100 | -1.392900 |
| C    | 1.121400  | -2.632900 | -0.482400 |
| C    | 0.938900  | -2.910800 | 0.892100  |
| C    | -0.393500 | -3.231600 | 1.335200  |

C -1.477500 -3.217100 0.461900  
H 0.193000 -2.373400 -2.430500  
H 2.111300 -2.385000 -0.849300  
H -0.560500 -3.426800 2.391400  
H -2.481900 -3.365800 0.839300  
C -2.514900 -2.833200 -1.827300  
H -3.356800 -2.528500 -1.194400  
C 2.101500 -2.950700 1.851500  
H 2.444800 -3.983400 2.000500  
H 2.943800 -2.364400 1.475700  
H 1.821400 -2.553000 2.833000  
C -2.423600 -1.838000 -2.992100  
H -1.639200 -2.114500 -3.707500  
H -3.371000 -1.826800 -3.542900  
H -2.229400 -0.826500 -2.624600  
C -2.795500 -4.264700 -2.333500  
H -2.904200 -4.973600 -1.504900  
H -3.721600 -4.284500 -2.919200  
H -1.980900 -4.619800 -2.976400  
u -0.327400 -1.098700 0.265200  
C -4.594800 3.541900 -0.439700  
C -3.652700 2.562800 -0.101500  
C -4.055900 1.208400 -0.069200  
C -5.393000 0.867000 -0.380600  
C -6.288600 1.880100 -0.736200  
C -5.914500 3.226100 -0.765100  
H -4.281400 4.584400 -0.451900  
H -7.311100 1.607700 -0.992100  
C -2.245400 3.013800 0.229200  
H -1.537300 2.724700 -0.552400  
H -2.215800 4.102900 0.344600  
H -1.877900 2.563200 1.156900  
C -6.915300 4.305400 -1.108000  
H -7.507200 4.595500 -0.228900  
H -6.419000 5.209100 -1.478000  
H -7.622500 3.968900 -1.874700  
C -5.895900 -0.560600 -0.360300

|   |           |           |           |
|---|-----------|-----------|-----------|
| H | -5.835800 | -0.986700 | 0.644100  |
| H | -6.933800 | -0.603700 | -0.707300 |
| H | -5.298900 | -1.211800 | -1.010100 |
| C | -3.078800 | 0.118200  | 0.329800  |
| O | -3.429300 | -0.779000 | 1.117700  |
| O | -1.906900 | 0.228000  | -0.214500 |
| N | 1.982500  | 0.902500  | 1.539700  |
| H | 2.775600  | 1.374500  | 1.955500  |
| C | 1.806000  | 1.079500  | 0.142400  |
| C | 0.826700  | 0.375000  | -0.579400 |
| C | 2.671700  | 1.994600  | -0.479400 |
| C | 0.718700  | 0.689000  | -1.944900 |
| C | 2.559400  | 2.251100  | -1.843600 |
| H | 3.426600  | 2.508500  | 0.113600  |
| C | 1.565700  | 1.602300  | -2.578300 |
| H | -0.053000 | 0.200500  | -2.532800 |
| H | 3.230500  | 2.959600  | -2.321200 |
| H | 1.451200  | 1.803100  | -3.640600 |
| C | 1.045900  | 0.579900  | 2.466300  |
| C | 0.431100  | 0.689200  | 4.664400  |
| C | -1.049400 | -0.200500 | 3.045300  |
| C | -0.831600 | 0.168400  | 4.363700  |
| H | 0.704800  | 0.950700  | 5.685600  |
| H | -1.983100 | -0.633800 | 2.696200  |
| H | -1.598600 | 0.035600  | 5.117100  |
| N | -0.101600 | -0.043500 | 2.093700  |
| N | 1.357500  | 0.906600  | 3.739500  |
| C | 5.755400  | 0.481300  | -1.357600 |
| O | 5.986700  | 0.522800  | -2.551600 |
| O | 6.181500  | 1.366200  | -0.431900 |
| C | 5.039400  | -0.620700 | -0.729700 |
| C | 6.992900  | 2.450000  | -0.947200 |
| C | 7.425400  | 3.296100  | 0.234800  |
| H | 6.397700  | 3.020200  | -1.667600 |
| H | 7.845800  | 2.023000  | -1.484400 |
| H | 8.045400  | 4.128300  | -0.115400 |
| H | 6.558800  | 3.710600  | 0.759900  |

|   |          |           |           |
|---|----------|-----------|-----------|
| H | 8.010800 | 2.705000  | 0.946300  |
| F | 4.596900 | -0.561400 | 0.515800  |
| F | 4.362600 | -1.468400 | -1.479500 |

TS\_meta\_Bc

| Atom | X         | Y         | Z         |
|------|-----------|-----------|-----------|
| C    | 0.946500  | -1.141800 | 2.710900  |
| C    | -0.445800 | -1.019400 | 2.516700  |
| C    | -1.157100 | -1.999200 | 1.753500  |
| C    | -0.501600 | -3.132000 | 1.219000  |
| C    | 0.901000  | -3.286500 | 1.509200  |
| C    | 1.605100  | -2.334200 | 2.240200  |
| H    | -0.978900 | -0.146800 | 2.873400  |
| H    | -2.210400 | -1.839900 | 1.547500  |
| H    | 1.430300  | -4.139800 | 1.092800  |
| H    | 2.677500  | -2.425600 | 2.361900  |
| C    | 1.763500  | -0.128200 | 3.497100  |
| H    | 2.781600  | -0.180300 | 3.093200  |
| C    | -1.249500 | -4.189400 | 0.447300  |
| H    | -1.521000 | -5.026900 | 1.103700  |
| H    | -2.170500 | -3.786500 | 0.016700  |
| H    | -0.639700 | -4.594400 | -0.367300 |
| C    | 1.282200  | 1.322700  | 3.358800  |
| H    | 0.282400  | 1.468000  | 3.785900  |
| H    | 1.962800  | 1.988400  | 3.901500  |
| H    | 1.268200  | 1.631700  | 2.309700  |
| C    | 1.818200  | -0.560600 | 4.978600  |
| H    | 2.202100  | -1.581100 | 5.089600  |
| H    | 2.474100  | 0.111000  | 5.544100  |
| H    | 0.821500  | -0.523400 | 5.434800  |
| Ru   | 0.466700  | -1.201800 | 0.421000  |
| C    | 4.232900  | 3.385200  | -1.825800 |
| C    | 3.470000  | 2.264400  | -1.479300 |
| C    | 3.845000  | 1.504200  | -0.346800 |
| C    | 4.974900  | 1.888300  | 0.412000  |
| C    | 5.689400  | 3.031200  | 0.037400  |
| C    | 5.342200  | 3.791600  | -1.081300 |

|   |           |           |           |
|---|-----------|-----------|-----------|
| H | 3.944800  | 3.959400  | -2.704800 |
| H | 6.547000  | 3.330900  | 0.637100  |
| C | 2.285300  | 1.912600  | -2.354400 |
| H | 1.337900  | 2.084200  | -1.836000 |
| H | 2.299900  | 2.514800  | -3.269400 |
| H | 2.289900  | 0.856400  | -2.643600 |
| C | 6.157300  | 4.995900  | -1.492100 |
| H | 5.530400  | 5.766300  | -1.954900 |
| H | 6.669100  | 5.445600  | -0.634300 |
| H | 6.929300  | 4.724300  | -2.225200 |
| C | 5.439700  | 1.120400  | 1.630800  |
| H | 5.737400  | 0.102700  | 1.367400  |
| H | 6.285700  | 1.630900  | 2.103200  |
| H | 4.645100  | 1.027700  | 2.380800  |
| C | 3.066200  | 0.263500  | 0.047100  |
| O | 3.664400  | -0.774500 | 0.383500  |
| O | 1.777800  | 0.403900  | -0.005600 |
| N | -1.256500 | -1.561800 | -2.389200 |
| H | -1.837700 | -1.789400 | -3.186400 |
| C | -1.654700 | -0.436600 | -1.626500 |
| C | -0.938700 | -0.032600 | -0.473200 |
| C | -2.786300 | 0.241100  | -2.066600 |
| C | -1.351400 | 1.182800  | 0.121000  |
| C | -3.314600 | 1.326200  | -1.311000 |
| H | -3.324400 | -0.105300 | -2.946400 |
| C | -2.480000 | 1.870200  | -0.286200 |
| H | -0.762000 | 1.582400  | 0.940800  |
| H | -4.046000 | 1.970900  | -1.793600 |
| H | -2.776500 | 2.784300  | 0.220400  |
| C | -0.026000 | -2.129700 | -2.488100 |
| C | 1.370000  | -3.414900 | -3.762300 |
| C | 2.139100  | -2.439600 | -1.747200 |
| C | 2.428500  | -3.187400 | -2.877600 |
| H | 1.498300  | -4.032600 | -4.649800 |
| H | 2.877600  | -2.206200 | -0.984700 |
| H | 3.422200  | -3.583800 | -3.047700 |
| N | 0.903400  | -1.939800 | -1.517600 |



|   |           |           |           |
|---|-----------|-----------|-----------|
| N | 0.163500  | -2.890500 | -3.587200 |
| C | -5.546100 | 1.337900  | 0.596100  |
| O | -5.198100 | 1.630400  | 1.724900  |
| O | -6.499700 | 1.979200  | -0.116400 |
| C | -4.851300 | 0.334600  | -0.240200 |
| C | -7.147600 | 3.077400  | 0.564000  |
| C | -8.186400 | 3.648800  | -0.382800 |
| H | -6.389500 | 3.817700  | 0.841000  |
| H | -7.596800 | 2.703500  | 1.489700  |
| H | -8.704000 | 4.487300  | 0.096100  |
| H | -7.719300 | 4.012200  | -1.303900 |
| H | -8.929700 | 2.890800  | -0.649600 |
| F | -5.579900 | -0.230900 | -1.219900 |
| F | -4.218900 | -0.615600 | 0.466700  |

#### Meta\_Bc

| Atom | X         | Y         | Z         |
|------|-----------|-----------|-----------|
| C    | 0.971200  | -1.180000 | 2.700200  |
| C    | -0.423400 | -1.080000 | 2.506800  |
| C    | -1.118100 | -2.073800 | 1.746900  |
| C    | -0.445300 | -3.198700 | 1.216400  |
| C    | 0.960900  | -3.324800 | 1.500300  |
| C    | 1.649900  | -2.360500 | 2.231400  |
| H    | -0.969900 | -0.214000 | 2.859300  |
| H    | -2.173700 | -1.930800 | 1.538500  |
| H    | 1.504200  | -4.169200 | 1.083500  |
| H    | 2.723700  | -2.433600 | 2.353500  |
| C    | 1.773300  | -0.150800 | 3.481100  |
| H    | 2.784600  | -0.172300 | 3.058400  |
| C    | -1.177700 | -4.274300 | 0.454900  |
| H    | -1.440900 | -5.107100 | 1.120700  |
| H    | -2.102000 | -3.888100 | 0.016700  |
| H    | -0.560000 | -4.681300 | -0.352700 |
| C    | 1.250000  | 1.287600  | 3.365600  |
| H    | 0.255300  | 1.401500  | 3.813400  |
| H    | 1.923000  | 1.966600  | 3.901200  |
| H    | 1.206200  | 1.606200  | 2.320300  |

|    |           |           |           |
|----|-----------|-----------|-----------|
| C  | 1.864900  | -0.593900 | 4.957700  |
| H  | 2.277300  | -1.604700 | 5.053400  |
| H  | 2.512300  | 0.090200  | 5.518000  |
| H  | 0.875200  | -0.586800 | 5.430600  |
| Ru | 0.486500  | -1.254400 | 0.407000  |
| C  | 4.068300  | 3.486700  | -1.827100 |
| C  | 3.353800  | 2.333200  | -1.485300 |
| C  | 3.750900  | 1.593100  | -0.346800 |
| C  | 4.855900  | 2.028900  | 0.420900  |
| C  | 5.521500  | 3.202200  | 0.050200  |
| C  | 5.150800  | 3.944500  | -1.073000 |
| H  | 3.763100  | 4.045300  | -2.710300 |
| H  | 6.359500  | 3.541200  | 0.656600  |
| C  | 2.196500  | 1.925300  | -2.372900 |
| H  | 1.236900  | 2.040300  | -1.861800 |
| H  | 2.186400  | 2.534900  | -3.283100 |
| H  | 2.261200  | 0.873400  | -2.670900 |
| C  | 5.914300  | 5.184000  | -1.478300 |
| H  | 6.699100  | 4.947800  | -2.210100 |
| H  | 5.256200  | 5.928100  | -1.940800 |
| H  | 6.404000  | 5.652800  | -0.617800 |
| C  | 5.345200  | 1.284800  | 1.644800  |
| H  | 5.681100  | 0.277500  | 1.387300  |
| H  | 6.170100  | 1.828900  | 2.116900  |
| H  | 4.552500  | 1.166600  | 2.393200  |
| C  | 3.022000  | 0.321300  | 0.045000  |
| O  | 3.660100  | -0.689400 | 0.391100  |
| O  | 1.729400  | 0.405600  | -0.020500 |
| N  | -1.266300 | -1.756800 | -2.355200 |
| H  | -1.847100 | -2.034400 | -3.137000 |
| C  | -1.738800 | -0.663700 | -1.585900 |
| C  | -0.959300 | -0.158800 | -0.498200 |
| C  | -2.951100 | -0.130800 | -1.942100 |
| C  | -1.390000 | 1.089900  | 0.045000  |
| C  | -3.590500 | 0.957900  | -1.130900 |
| H  | -3.519200 | -0.542800 | -2.772700 |
| C  | -2.593100 | 1.661000  | -0.249900 |

|   |           |           |           |
|---|-----------|-----------|-----------|
| H | -0.717300 | 1.602200  | 0.728300  |
| H | -4.097200 | 1.678600  | -1.790500 |
| H | -2.875000 | 2.617000  | 0.185100  |
| C | 0.006100  | -2.217200 | -2.488900 |
| C | 1.470000  | -3.379800 | -3.805700 |
| C | 2.201900  | -2.381400 | -1.788500 |
| C | 2.524300  | -3.092100 | -2.934100 |
| H | 1.626700  | -3.972900 | -4.705400 |
| H | 2.934300  | -2.113600 | -1.031400 |
| H | 3.539900  | -3.417300 | -3.124400 |
| N | 0.938800  | -1.971700 | -1.533200 |
| N | 0.232200  | -2.946100 | -3.602500 |
| C | -5.485700 | 1.383200  | 0.602300  |
| O | -5.443600 | 1.397100  | 1.809100  |
| O | -6.139000 | 2.268000  | -0.166200 |
| C | -4.753300 | 0.357100  | -0.282400 |
| C | -6.865500 | 3.304400  | 0.542100  |
| C | -7.534300 | 4.183500  | -0.496800 |
| H | -6.158200 | 3.861400  | 1.164700  |
| H | -7.589800 | 2.825000  | 1.207800  |
| H | -8.096700 | 4.980600  | 0.001400  |
| H | -6.792400 | 4.645500  | -1.156000 |
| H | -8.229300 | 3.602900  | -1.111500 |
| F | -5.675400 | -0.211400 | -1.128100 |
| F | -4.292700 | -0.631900 | 0.532600  |

#### TS\_para\_Bc

| Atom | X         | Y         | Z         |
|------|-----------|-----------|-----------|
| C    | -0.915100 | -2.684700 | -0.804200 |
| C    | 0.449300  | -2.367000 | -0.972400 |
| C    | 1.352100  | -2.457100 | 0.134400  |
| C    | 0.919500  | -2.911400 | 1.400900  |
| C    | -0.456600 | -3.317200 | 1.527900  |
| C    | -1.346800 | -3.221000 | 0.462100  |
| H    | 0.819600  | -1.974900 | -1.911500 |
| H    | 2.377600  | -2.130400 | -0.002100 |
| H    | -0.817400 | -3.649100 | 2.498100  |

H -2.396200 -3.446300 0.608900  
C -1.928700 -2.597200 -1.934400  
H -2.903000 -2.432300 -1.458500  
C 1.873500 -3.046800 2.560600  
H 2.235600 -4.080200 2.645400  
H 2.742800 -2.395300 2.434200  
H 1.389300 -2.790100 3.509000  
C -1.689600 -1.439900 -2.914300  
H -0.749600 -1.555800 -3.467200  
H -2.497100 -1.413000 -3.654500  
H -1.675900 -0.481600 -2.387500  
C -1.985000 -3.953500 -2.670400  
H -2.196900 -4.780000 -1.982400  
H -2.771900 -3.937500 -3.432900  
H -1.032800 -4.166600 -3.171000  
Ru -0.291200 -1.059800 0.755600  
C -4.574000 3.484300 -0.390300  
C -3.664400 2.520100 0.060000  
C -3.988600 1.152300 -0.086600  
C -5.218700 0.782500 -0.678900  
C -6.082000 1.783800 -1.134300  
C -5.781200 3.141600 -1.001700  
H -4.326400 4.536200 -0.259200  
H -7.021900 1.491200 -1.599200  
C -2.381500 2.997800 0.707300  
H -1.515500 2.811700 0.065700  
H -2.440200 4.072100 0.913900  
H -2.180600 2.480000 1.651000  
C -6.723400 4.202400 -1.521900  
H -6.609100 5.144200 -0.974200  
H -6.534400 4.418500 -2.582400  
H -7.769500 3.886500 -1.438800  
C -5.641600 -0.661100 -0.848600  
H -5.753000 -1.157300 0.118600  
H -6.590000 -0.718500 -1.393200  
H -4.898000 -1.239200 -1.410300  
C -3.048700 0.075200 0.420000

|   |           |           |           |
|---|-----------|-----------|-----------|
| O | -3.492000 | -0.893800 | 1.061400  |
| O | -1.801900 | 0.272400  | 0.119000  |
| N | 1.643500  | 0.866700  | 2.652800  |
| H | 2.300800  | 1.333000  | 3.266300  |
| C | 1.769200  | 1.136600  | 1.277100  |
| C | 0.956800  | 0.502600  | 0.308500  |
| C | 2.745900  | 2.094400  | 0.918700  |
| C | 1.125600  | 0.919600  | -1.008200 |
| C | 2.944100  | 2.437100  | -0.400400 |
| H | 3.326700  | 2.582400  | 1.700600  |
| C | 2.192600  | 1.776800  | -1.421000 |
| H | 0.480300  | 0.511300  | -1.778400 |
| H | 3.693600  | 3.176800  | -0.664400 |
| H | 2.131300  | 2.237400  | -2.405600 |
| C | 0.559600  | 0.412700  | 3.340900  |
| C | -0.464200 | 0.286500  | 5.379200  |
| C | -1.553000 | -0.509800 | 3.432300  |
| C | -1.609500 | -0.263800 | 4.795400  |
| H | -0.405800 | 0.465000  | 6.451700  |
| H | -2.378400 | -0.940100 | 2.871400  |
| H | -2.494900 | -0.504800 | 5.371200  |
| N | -0.455600 | -0.216400 | 2.697100  |
| N | 0.603600  | 0.633500  | 4.671300  |
| C | 4.601700  | 1.029800  | -2.922100 |
| O | 4.473500  | 1.389300  | -4.077600 |
| O | 5.638400  | 1.347300  | -2.117500 |
| C | 3.539700  | 0.317200  | -2.174300 |
| C | 6.660000  | 2.172200  | -2.723500 |
| C | 7.719500  | 2.431900  | -1.669100 |
| H | 6.198800  | 3.098100  | -3.083200 |
| H | 7.066500  | 1.647100  | -3.593800 |
| H | 8.517600  | 3.053000  | -2.090400 |
| H | 7.294000  | 2.954900  | -0.806500 |
| H | 8.160500  | 1.493100  | -1.319200 |
| F | 3.935600  | -0.387700 | -1.098800 |
| F | 2.758300  | -0.448700 | -2.957700 |

## Para\_Bc

| Atom | X         | Y         | Z         |
|------|-----------|-----------|-----------|
| C    | 0.472400  | -0.609200 | 2.792200  |
| C    | -0.869500 | -0.724800 | 2.375300  |
| C    | -1.333900 | -1.932500 | 1.763200  |
| C    | -0.483400 | -3.051200 | 1.611400  |
| C    | 0.853200  | -2.951500 | 2.141700  |
| C    | 1.319500  | -1.774700 | 2.717800  |
| H    | -1.542100 | 0.122500  | 2.426500  |
| H    | -2.347300 | -1.964600 | 1.376300  |
| H    | 1.529100  | -3.794200 | 2.022100  |
| H    | 2.357300  | -1.690600 | 3.016100  |
| C    | 1.035200  | 0.651500  | 3.429800  |
| H    | 2.111500  | 0.643900  | 3.219200  |
| C    | -0.973300 | -4.342200 | 1.005800  |
| H    | -1.245800 | -5.058700 | 1.792300  |
| H    | -1.856700 | -4.177400 | 0.382000  |
| H    | -0.200800 | -4.811900 | 0.387600  |
| C    | 0.462200  | 1.959600  | 2.867200  |
| H    | -0.609100 | 2.063800  | 3.077100  |
| H    | 0.966400  | 2.812700  | 3.335100  |
| H    | 0.619400  | 2.020100  | 1.786700  |
| C    | 0.853500  | 0.571900  | 4.961100  |
| H    | 1.296400  | -0.341100 | 5.375400  |
| H    | 1.333400  | 1.430400  | 5.444500  |
| H    | -0.209800 | 0.583000  | 5.230200  |
| Ru   | 0.406600  | -1.221100 | 0.543000  |
| C    | 4.165400  | 3.175600  | -2.064200 |
| C    | 3.429900  | 2.077200  | -1.604600 |
| C    | 3.684300  | 1.577800  | -0.305900 |
| C    | 4.668000  | 2.194700  | 0.501600  |
| C    | 5.357800  | 3.305400  | 0.004400  |
| C    | 5.129600  | 3.809200  | -1.277900 |
| H    | 3.972300  | 3.548800  | -3.068500 |
| H    | 6.100300  | 3.786200  | 0.639000  |
| C    | 2.404900  | 1.466700  | -2.537300 |
| H    | 1.385400  | 1.646100  | -2.184800 |

|   |           |           |           |
|---|-----------|-----------|-----------|
| H | 2.511300  | 1.888400  | -3.542700 |
| H | 2.516000  | 0.379600  | -2.610600 |
| C | 5.922000  | 4.981500  | -1.808700 |
| H | 6.827800  | 4.646700  | -2.332800 |
| H | 5.336200  | 5.572300  | -2.521700 |
| H | 6.243900  | 5.647400  | -1.000400 |
| C | 5.001400  | 1.712200  | 1.897200  |
| H | 5.420100  | 0.703000  | 1.877600  |
| H | 5.719700  | 2.389400  | 2.371800  |
| H | 4.111800  | 1.665000  | 2.536400  |
| C | 2.932300  | 0.371100  | 0.222900  |
| O | 3.536500  | -0.520500 | 0.846100  |
| O | 1.661100  | 0.381600  | -0.033900 |
| N | -0.746100 | -2.238700 | -2.426300 |
| H | -1.149600 | -2.666300 | -3.251400 |
| C | -1.369500 | -1.081400 | -1.950500 |
| C | -0.936200 | -0.395100 | -0.773500 |
| C | -2.455100 | -0.591300 | -2.739100 |
| C | -1.558400 | 0.787200  | -0.473600 |
| C | -3.140300 | 0.533900  | -2.406800 |
| H | -2.721900 | -1.128200 | -3.650100 |
| C | -2.787600 | 1.317700  | -1.173700 |
| H | -1.224700 | 1.370500  | 0.376900  |
| H | -3.945200 | 0.899700  | -3.036300 |
| H | -2.664300 | 2.382200  | -1.433100 |
| C | 0.480400  | -2.755800 | -2.152500 |
| C | 2.112800  | -4.196500 | -2.845500 |
| C | 2.472200  | -2.769700 | -0.987900 |
| C | 2.984100  | -3.719100 | -1.858100 |
| H | 2.418100  | -4.979900 | -3.537600 |
| H | 3.051000  | -2.331000 | -0.179700 |
| H | 4.001400  | -4.078000 | -1.760100 |
| N | 1.205100  | -2.307500 | -1.094200 |
| N | 0.884700  | -3.724200 | -3.004900 |
| C | -5.252300 | 1.980000  | -0.689100 |
| O | -5.258800 | 2.796300  | -1.584200 |
| O | -6.323000 | 1.574900  | -0.002300 |

|   |           |          |           |
|---|-----------|----------|-----------|
| C | -3.961400 | 1.313500 | -0.166200 |
| C | -7.582500 | 2.196100 | -0.368200 |
| C | -8.651000 | 1.625800 | 0.544100  |
| H | -7.779500 | 1.982300 | -1.423400 |
| H | -7.478700 | 3.280200 | -0.260700 |
| H | -9.621700 | 2.069800 | 0.297700  |
| H | -8.727500 | 0.540300 | 0.426500  |
| H | -8.427100 | 1.845100 | 1.592800  |
| F | -4.241100 | 0.041600 | 0.245500  |
| F | -3.605600 | 2.023300 | 0.962200  |

Structure of Meta\_B<sub>N</sub> binding with Na<sup>+</sup>

| Atom | X        | Y         | Z         |
|------|----------|-----------|-----------|
| C    | 3.233500 | 1.652500  | -1.365300 |
| C    | 2.325200 | 2.720700  | -1.507700 |
| C    | 2.077600 | 3.633900  | -0.426400 |
| C    | 2.723300 | 3.502500  | 0.818600  |
| C    | 3.604800 | 2.376700  | 0.978700  |
| C    | 3.868200 | 1.490300  | -0.083700 |
| H    | 1.764900 | 2.837700  | -2.427600 |
| H    | 1.346200 | 4.424000  | -0.563300 |
| H    | 4.046000 | 2.177800  | 1.950300  |
| H    | 4.483500 | 0.618600  | 0.102100  |
| C    | 3.540200 | 0.662800  | -2.475300 |
| H    | 3.775500 | -0.289600 | -1.984500 |
| C    | 2.485200 | 4.465700  | 1.950600  |
| H    | 3.300200 | 5.198800  | 1.999400  |
| H    | 1.548200 | 5.014400  | 1.818600  |
| H    | 2.450300 | 3.947400  | 2.914000  |
| C    | 2.370400 | 0.405600  | -3.434400 |
| H    | 2.110000 | 1.297000  | -4.018000 |
| H    | 2.651600 | -0.374100 | -4.149500 |
| H    | 1.485500 | 0.063200  | -2.889400 |
| C    | 4.802100 | 1.132600  | -3.232200 |
| H    | 5.653900 | 1.270900  | -2.557200 |
| H    | 5.085200 | 0.388900  | -3.984400 |
| H    | 4.620300 | 2.083100  | -3.747600 |



|    |           |           |           |
|----|-----------|-----------|-----------|
| Ru | 1.655400  | 1.523700  | 0.303600  |
| C  | 0.776300  | -4.755300 | -0.492700 |
| C  | 0.803700  | -3.410900 | -0.110100 |
| C  | 2.042600  | -2.800200 | 0.182700  |
| C  | 3.235600  | -3.554800 | 0.076900  |
| C  | 3.158100  | -4.888900 | -0.335600 |
| C  | 1.941700  | -5.515000 | -0.617600 |
| H  | -0.184100 | -5.220700 | -0.706300 |
| H  | 4.080200  | -5.458000 | -0.432700 |
| C  | -0.512800 | -2.669500 | -0.023700 |
| H  | -0.608600 | -1.953900 | -0.846400 |
| H  | -1.347100 | -3.378500 | -0.079100 |
| H  | -0.603700 | -2.099300 | 0.907800  |
| C  | 1.886700  | -6.970200 | -1.017600 |
| H  | 1.809900  | -7.620200 | -0.135700 |
| H  | 1.019300  | -7.180300 | -1.652400 |
| H  | 2.787600  | -7.270400 | -1.562800 |
| C  | 4.603100  | -2.979800 | 0.378200  |
| H  | 4.713700  | -2.755200 | 1.442400  |
| H  | 5.384800  | -3.686700 | 0.083800  |
| H  | 4.782600  | -2.040100 | -0.157600 |
| C  | 2.132800  | -1.357800 | 0.630000  |
| O  | 2.874800  | -1.029000 | 1.560900  |
| O  | 1.397800  | -0.518400 | -0.065600 |
| N  | -0.523800 | 1.586900  | 0.382500  |
| C  | -1.566000 | 1.686400  | -0.550100 |
| C  | -2.345100 | 0.611000  | -0.920800 |
| C  | -1.756700 | 2.956500  | -1.185100 |
| C  | -3.415600 | 0.713000  | -1.982600 |
| H  | -2.100500 | -0.372900 | -0.531300 |
| C  | -2.709600 | 3.108200  | -2.217000 |
| H  | -1.143200 | 3.791900  | -0.867300 |
| C  | -3.503900 | 2.071600  | -2.624400 |
| H  | -3.232000 | -0.049700 | -2.761500 |
| H  | -2.808500 | 4.075500  | -2.702700 |
| H  | -4.227800 | 2.202200  | -3.421400 |
| C  | -0.590500 | 1.123400  | 1.626700  |

|    |           |           |           |
|----|-----------|-----------|-----------|
| C  | 0.919200  | 0.592500  | 3.340900  |
| C  | -1.430000 | 0.399800  | 3.632300  |
| C  | -0.158400 | 0.269600  | 4.175400  |
| H  | 1.955100  | 0.481500  | 3.641400  |
| H  | -2.303200 | 0.162100  | 4.238300  |
| H  | -0.005500 | -0.075800 | 5.189900  |
| N  | -1.682300 | 0.797500  | 2.368600  |
| N  | 0.695800  | 1.045400  | 2.118100  |
| C  | -4.872800 | -1.128400 | -0.882700 |
| O  | -4.995500 | -2.080700 | -1.603500 |
| O  | -4.716500 | -1.173600 | 0.462000  |
| C  | -4.809300 | 0.313700  | -1.425000 |
| C  | -4.741700 | -2.522400 | 1.051500  |
| C  | -4.613600 | -2.371800 | 2.552800  |
| H  | -3.916600 | -3.089700 | 0.614500  |
| H  | -5.682500 | -2.991400 | 0.756100  |
| H  | -4.648100 | -3.361700 | 3.019000  |
| H  | -3.657000 | -1.913000 | 2.829800  |
| H  | -5.439200 | -1.781900 | 2.967200  |
| F  | -5.156300 | 1.198400  | -0.391900 |
| F  | -5.756300 | 0.441700  | -2.373900 |
| Na | -3.864700 | 0.885900  | 1.401200  |

Structure of Meta\_B<sub>N</sub> binding with K<sup>+</sup>

| Atom | X         | Y        | Z         |
|------|-----------|----------|-----------|
| C    | -3.410000 | 2.054800 | 1.196600  |
| C    | -2.291100 | 2.743400 | 1.715100  |
| C    | -1.545600 | 3.657100 | 0.897500  |
| C    | -1.904400 | 3.933500 | -0.439300 |
| C    | -2.996400 | 3.169700 | -0.973900 |
| C    | -3.745200 | 2.266200 | -0.183400 |
| H    | -1.962500 | 2.556600 | 2.730200  |
| H    | -0.670200 | 4.144000 | 1.317800  |
| H    | -3.237000 | 3.262100 | -2.029200 |
| H    | -4.517900 | 1.665700 | -0.647300 |
| C    | -4.233600 | 1.084500 | 2.023900  |
| H    | -4.641600 | 0.347100 | 1.322000  |

|   |           |           |           |
|---|-----------|-----------|-----------|
| C | -1.163500 | 4.939100  | -1.286300 |
| H | -1.721800 | 5.883000  | -1.334000 |
| H | -0.174900 | 5.157600  | -0.870200 |
| H | -1.034900 | 4.579800  | -2.314400 |
| C | -3.431500 | 0.317200  | 3.084200  |
| H | -3.055900 | 0.977000  | 3.876000  |
| H | -4.081000 | -0.421600 | 3.565300  |
| H | -2.590300 | -0.212900 | 2.629000  |
| C | -5.421100 | 1.848900  | 2.650400  |
| H | -6.025100 | 2.357900  | 1.890700  |
| H | -6.071000 | 1.149000  | 3.186500  |
| H | -5.070300 | 2.601500  | 3.366700  |
| u | -1.589000 | 1.652000  | -0.177600 |
| C | -2.136500 | -4.677000 | 0.088700  |
| C | -1.873300 | -3.326200 | -0.159900 |
| C | -2.949000 | -2.464800 | -0.474100 |
| C | -4.267100 | -2.978100 | -0.531800 |
| C | -4.478800 | -4.330900 | -0.249300 |
| C | -3.430400 | -5.202000 | 0.056400  |
| H | -1.303300 | -5.338400 | 0.318300  |
| H | -5.496200 | -4.715700 | -0.276400 |
| C | -0.434200 | -2.859500 | -0.104400 |
| H | -0.259500 | -2.190300 | 0.742600  |
| H | 0.237200  | -3.720200 | -0.014100 |
| H | -0.151400 | -2.305700 | -1.007400 |
| C | -3.686500 | -6.668100 | 0.313600  |
| H | -3.730700 | -7.232900 | -0.627200 |
| H | -2.894300 | -7.113400 | 0.924300  |
| H | -4.641100 | -6.823700 | 0.827900  |
| C | -5.469200 | -2.127900 | -0.883700 |
| H | -5.456600 | -1.842700 | -1.939800 |
| H | -6.394000 | -2.677200 | -0.681000 |
| H | -5.499900 | -1.192800 | -0.313700 |
| C | -2.727700 | -1.001900 | -0.779400 |
| O | -3.313700 | -0.447000 | -1.714900 |
| O | -1.902000 | -0.395100 | 0.044400  |
| N | 0.533600  | 1.047400  | -0.171900 |

|   |           |           |           |
|---|-----------|-----------|-----------|
| C | 1.421700  | 0.631300  | 0.826300  |
| C | 2.348100  | -0.397400 | 0.730800  |
| C | 1.263100  | 1.308400  | 2.084100  |
| C | 3.237100  | -0.793100 | 1.894500  |
| H | 2.344600  | -1.045000 | -0.142500 |
| C | 1.933700  | 0.869500  | 3.240800  |
| H | 0.548300  | 2.119500  | 2.136700  |
| C | 2.844100  | -0.150800 | 3.199000  |
| H | 3.230300  | -1.889600 | 2.007300  |
| H | 1.704100  | 1.342100  | 4.192400  |
| H | 3.344700  | -0.490400 | 4.098200  |
| C | 0.539200  | 0.758000  | -1.474800 |
| C | -1.004100 | 0.846500  | -3.242000 |
| C | 1.209300  | 0.047200  | -3.543700 |
| C | -0.037100 | 0.311900  | -4.099600 |
| H | -2.020000 | 1.060300  | -3.554200 |
| H | 2.001400  | -0.364100 | -4.169100 |
| H | -0.255100 | 0.105300  | -5.139800 |
| N | 1.529000  | 0.250400  | -2.251200 |
| N | -0.699300 | 1.092900  | -1.977000 |
| C | 5.505700  | -1.390900 | 0.667900  |
| O | 5.583900  | -2.576200 | 0.852200  |
| O | 6.094100  | -0.700900 | -0.341100 |
| C | 4.738300  | -0.449100 | 1.633300  |
| C | 7.176900  | -1.343800 | -1.098900 |
| C | 8.313700  | -0.340000 | -1.199400 |
| H | 6.770400  | -1.614500 | -2.078600 |
| H | 7.459600  | -2.260200 | -0.579100 |
| H | 9.088700  | -0.721000 | -1.871800 |
| H | 7.972500  | 0.627000  | -1.590900 |
| H | 8.765200  | -0.167200 | -0.218200 |
| F | 4.838700  | 0.852900  | 1.181800  |
| F | 5.450500  | -0.518000 | 2.792100  |
| K | 4.115500  | 0.694900  | -1.530700 |

## 7. Crystallographic Details

Crystals were grown from a mixture of CH<sub>2</sub>Cl<sub>2</sub> and n-hexane.

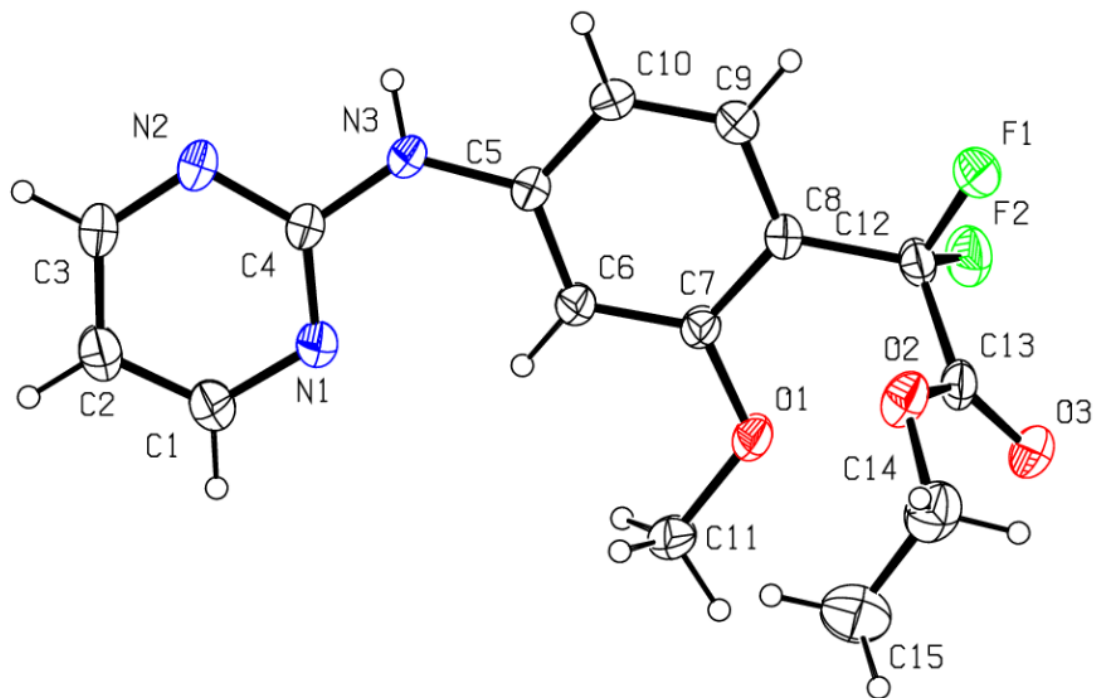

Molecular structure of compound **3c**. The ellipsoid contour percent probability level is 30% in the caption of the thermal ellipsoid plot. (CCDC 1827733)

| Table S3. Crystal data and structure refinement for <b>3c</b> . |                                                                              |
|-----------------------------------------------------------------|------------------------------------------------------------------------------|
| Identification code                                             | 3c                                                                           |
| Empirical formula                                               | C <sub>15</sub> H <sub>15</sub> F <sub>2</sub> N <sub>3</sub> O <sub>3</sub> |
| Formula weight                                                  | 323.30                                                                       |
| Temperature/K                                                   | 289.7(5)                                                                     |
| Crystal system                                                  | triclinic                                                                    |
| Space group                                                     | P-1                                                                          |
| a/Å                                                             | 12.5999(8)                                                                   |
| b/Å                                                             | 12.8512(7)                                                                   |
| c/Å                                                             | 13.5479(9)                                                                   |
| α/°                                                             | 63.165(6)                                                                    |
| β/°                                                             | 62.666(7)                                                                    |
| γ/°                                                             | 64.519(6)                                                                    |
| Volume/Å <sup>3</sup>                                           | 1668.7(2)                                                                    |
| Z                                                               | 4                                                                            |
| ρ <sub>calc</sub> /cm <sup>3</sup>                              | 1.287                                                                        |
| μ/mm <sup>-1</sup>                                              | 0.907                                                                        |
| F(000)                                                          | 672.0                                                                        |
| Crystal size/mm <sup>3</sup>                                    | 0.23 × 0.21 × 0.15                                                           |
| Radiation                                                       | CuKα (λ = 1.54184)                                                           |
| 2θ range for data collection/°                                  | 7.744 to 139.966                                                             |

|                                             |                                                               |
|---------------------------------------------|---------------------------------------------------------------|
| Index ranges                                | -15 ≤ h ≤ 14, -15 ≤ k ≤ 11, -16 ≤ l ≤ 12                      |
| Reflections collected                       | 10134                                                         |
| Independent reflections                     | 6075 [R <sub>int</sub> = 0.0531, R <sub>sigma</sub> = 0.0583] |
| Data/restraints/parameters                  | 6075/18/419                                                   |
| Goodness-of-fit on F <sup>2</sup>           | 1.169                                                         |
| Final R indexes [I ≥ 2σ (I)]                | R <sub>1</sub> = 0.0789, wR <sub>2</sub> = 0.2500             |
| Final R indexes [all data]                  | R <sub>1</sub> = 0.0990, wR <sub>2</sub> = 0.3102             |
| Largest diff. peak/hole / e Å <sup>-3</sup> | 0.40/-0.44                                                    |

## 8. NMR spectra

8.470  
8.458  
7.748  
7.727  
7.615  
7.586  
7.564  
7.264  
6.807  
6.796  
6.784

4.324  
4.306  
4.288  
4.270

1.329  
1.311  
1.293

0.000

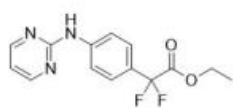

3a

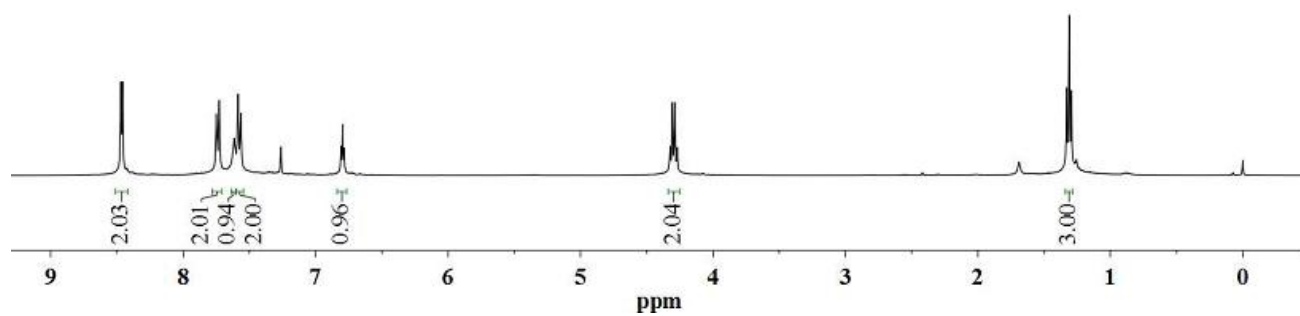

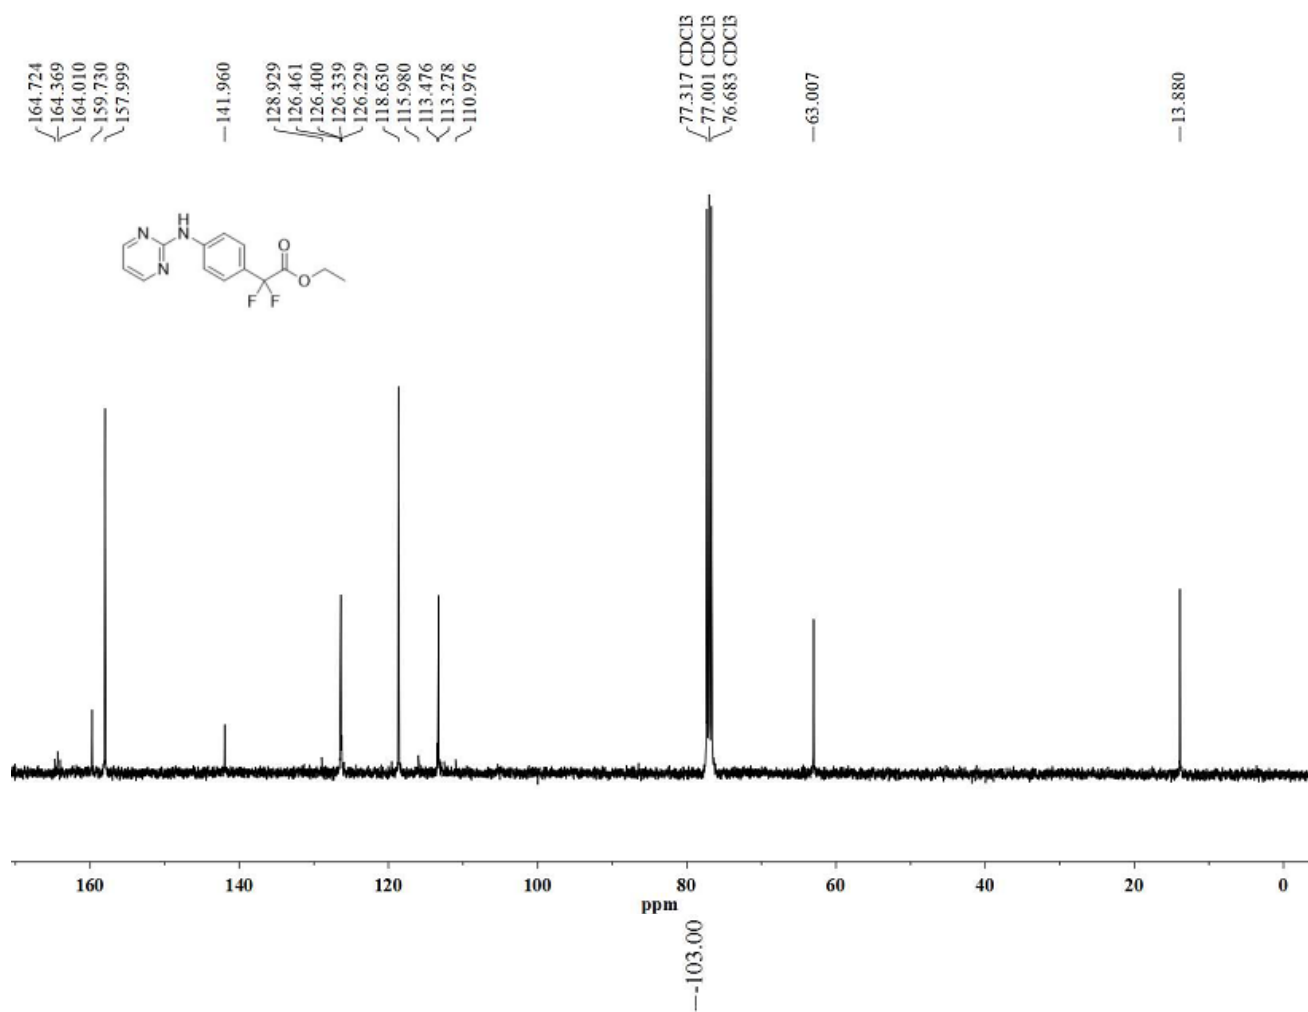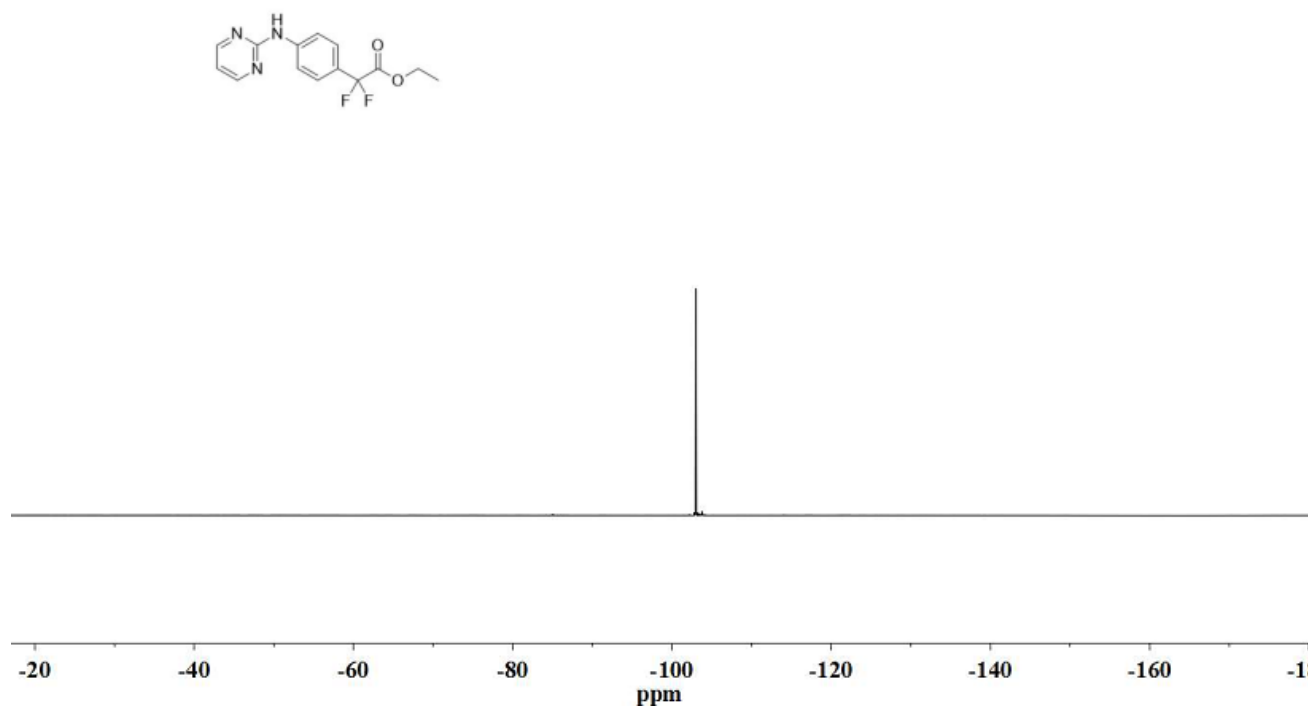

8.473  
8.461  
7.601  
7.579  
7.539  
7.518  
7.497  
7.268  
6.808  
6.796  
6.784

4.338  
4.320  
4.303  
4.285

-2.437

1.330  
1.312  
1.294

-0.000

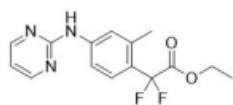

3b

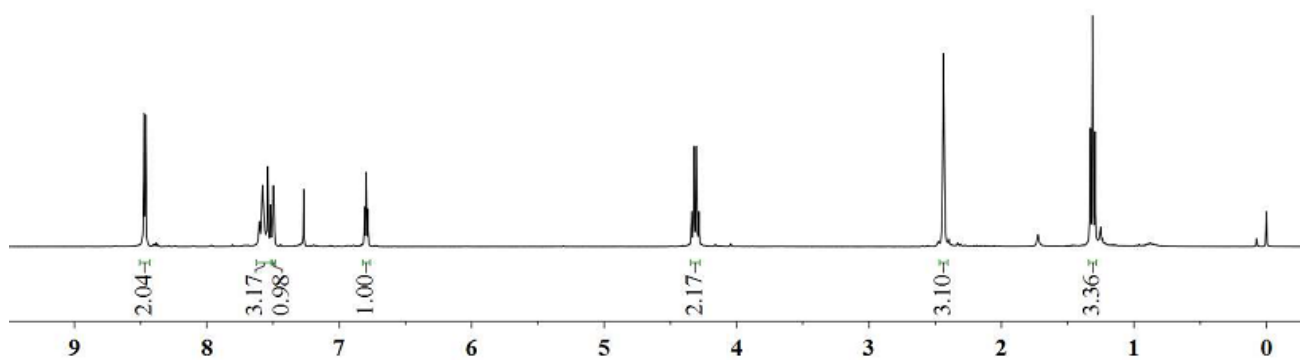

164.698  
164.343  
163.987  
159.756  
157.974  
141.573  
137.522  
137.495  
137.465  
127.276  
127.189  
127.101  
124.926  
124.687  
124.449  
121.635  
116.823  
115.956  
114.326  
113.070  
111.831  
77.318  
77.000  
76.682  
-63.006  
19.956  
19.930  
19.924  
13.859

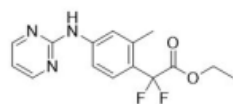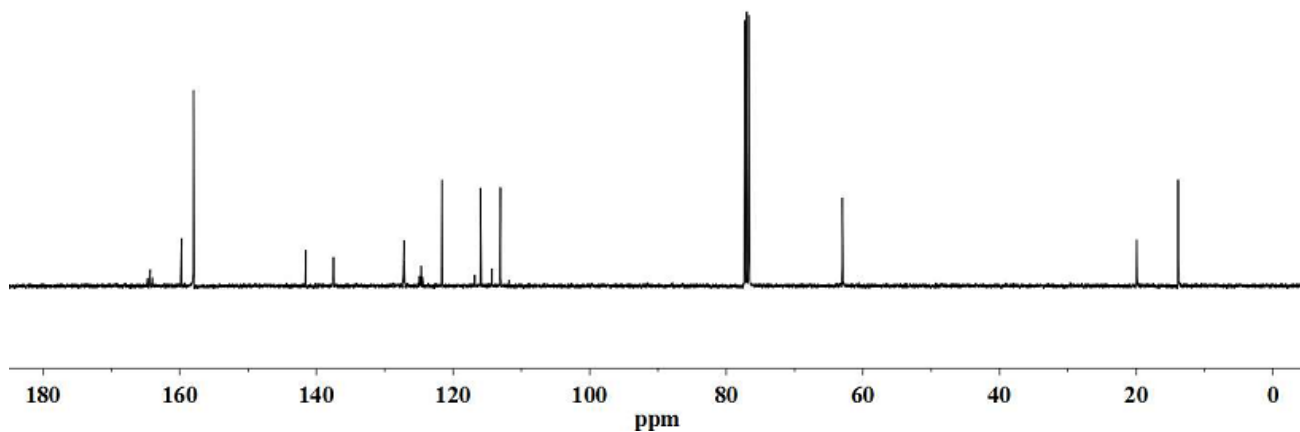



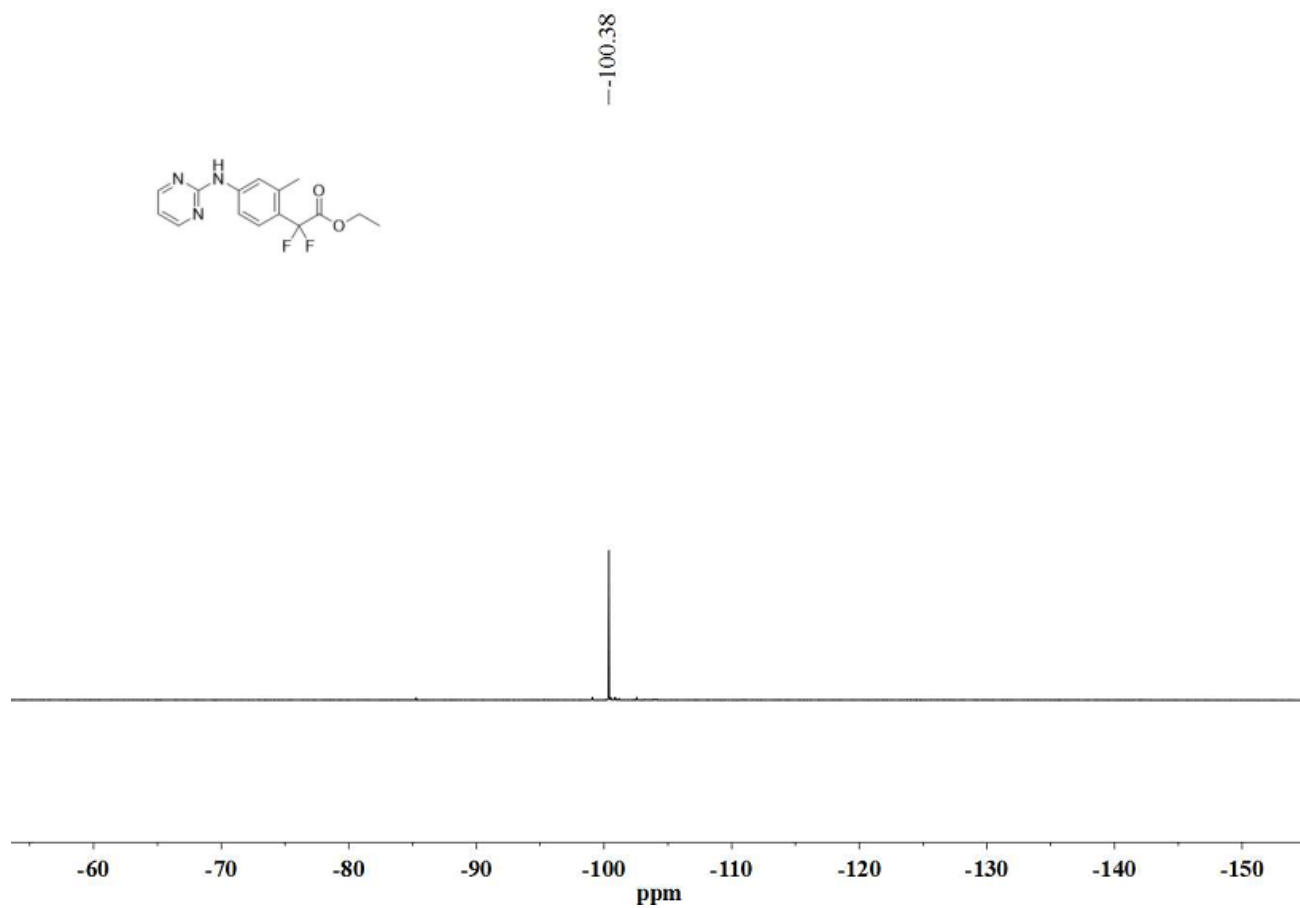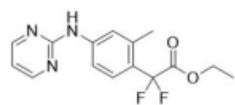

8.476  
8.464  
7.669  
7.658  
7.571  
7.550  
7.265  
7.102  
7.097  
7.081  
7.076  
6.811  
6.799  
6.787

4.356  
4.339  
4.321  
4.303  
3.846

1.324  
1.306  
1.288

0.000

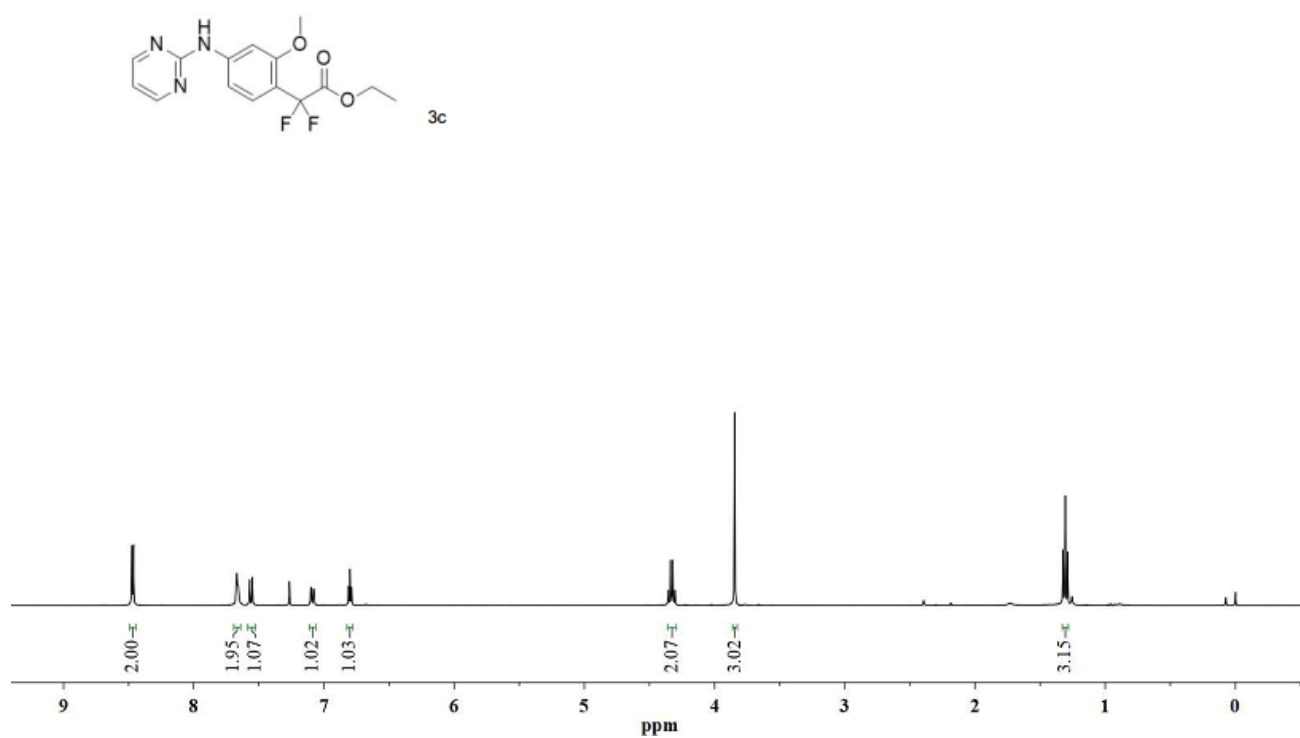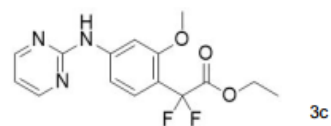

2.00H  
1.95H  
1.07H  
1.02H  
1.03H

2.07H  
3.02H

3.15H

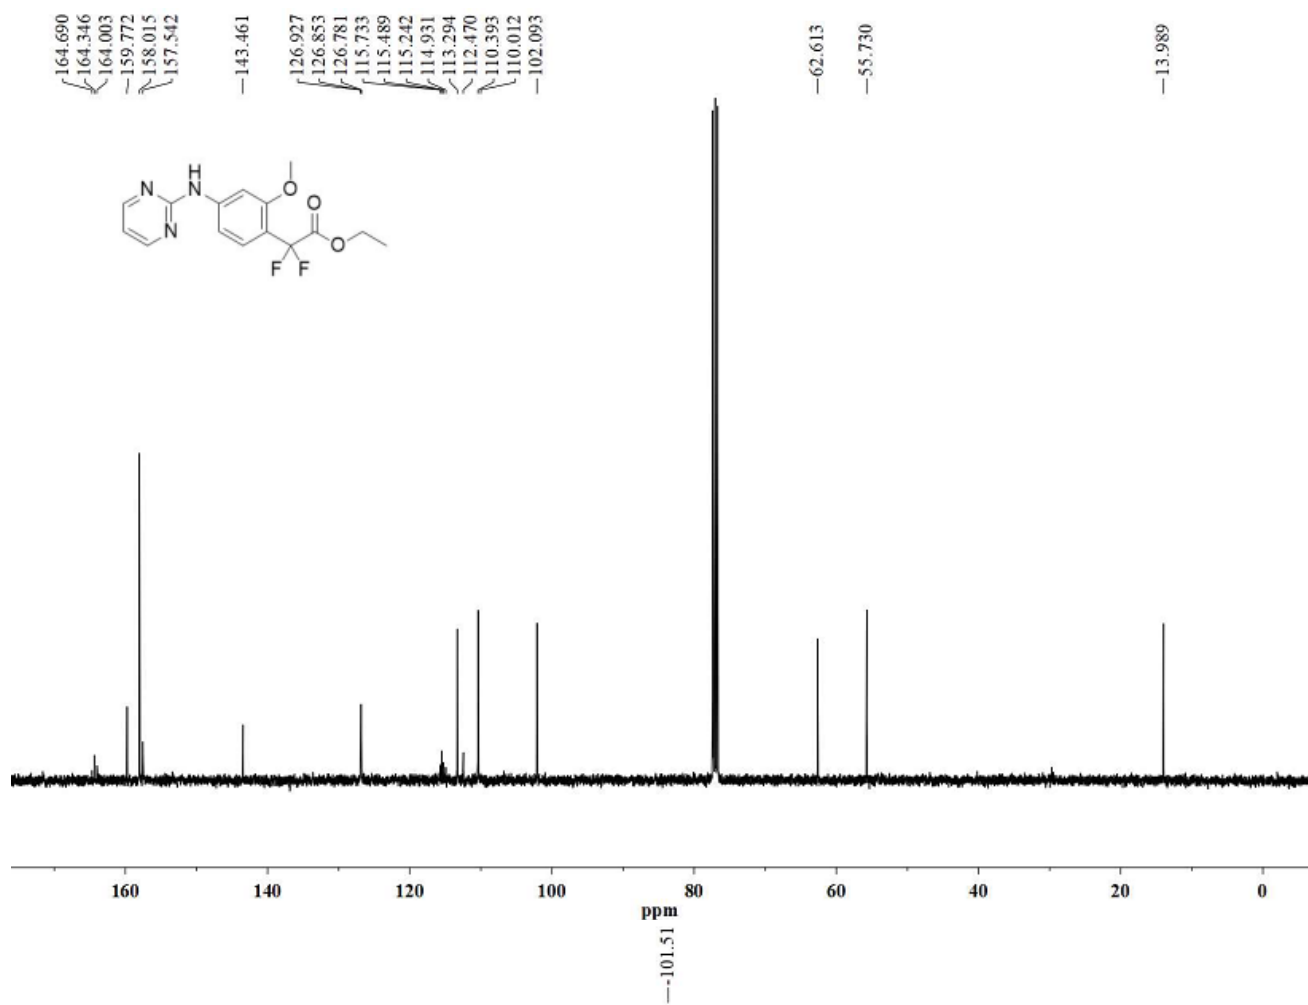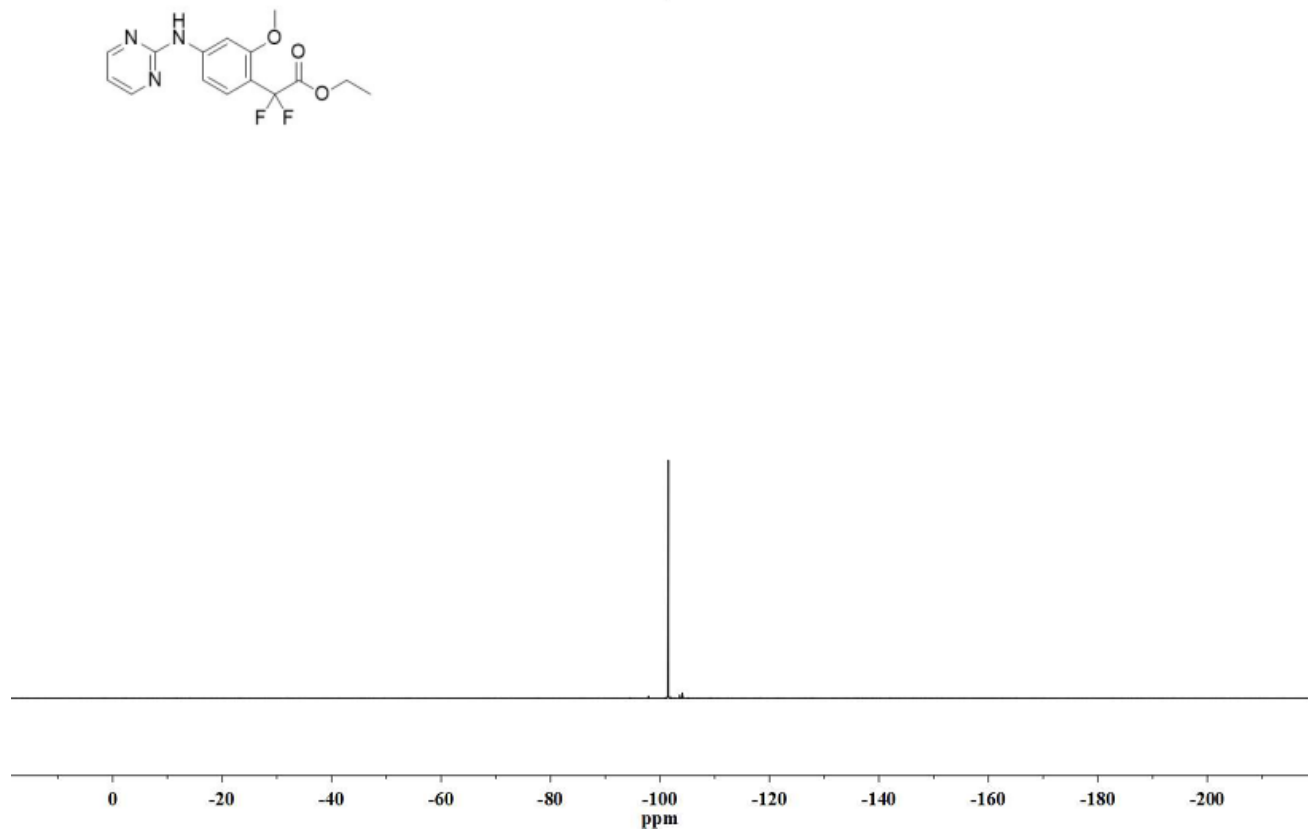

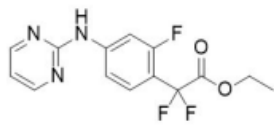

3d

8.504  
8.492  
7.952  
7.918  
7.805  
7.567  
7.546  
7.525  
7.267  
7.243  
7.222  
6.867  
6.855  
6.843

4.385  
4.368  
4.350  
4.332

1.349  
1.331  
1.313

-0.000

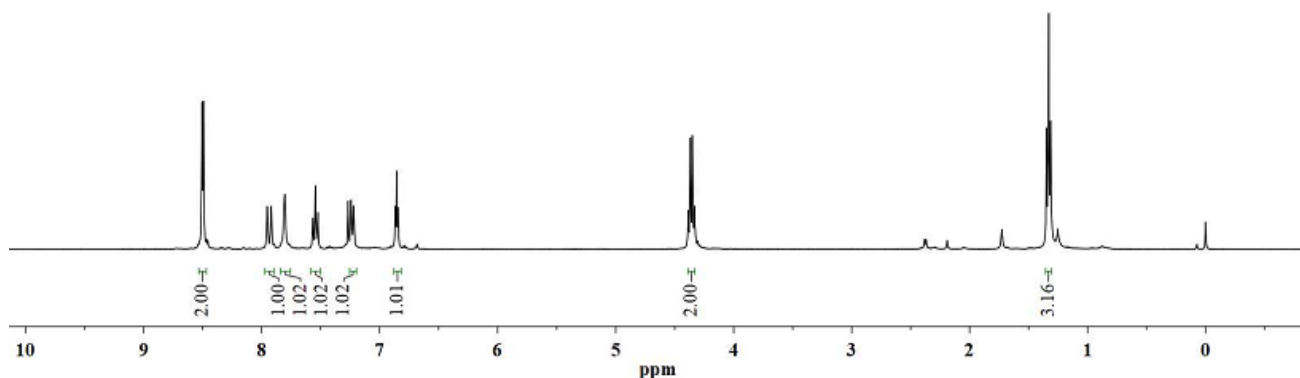

163.864  
163.520  
163.177  
161.553  
161.506  
161.458  
159.325  
159.072  
159.024  
158.979  
158.010  
143.942  
143.827  
127.385  
127.347  
127.318  
127.279  
127.249  
127.211  
114.233  
113.792  
113.701  
113.673  
111.745  
109.258  
106.254  
105.989

77.318  
77.000  
76.683

-63.258

-13.830

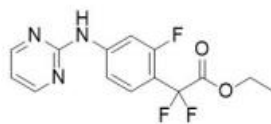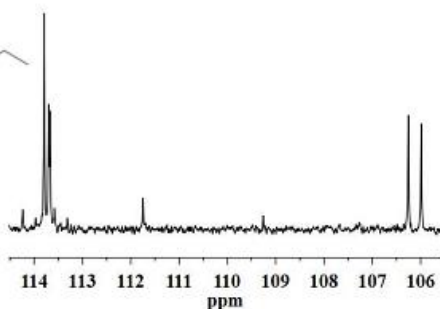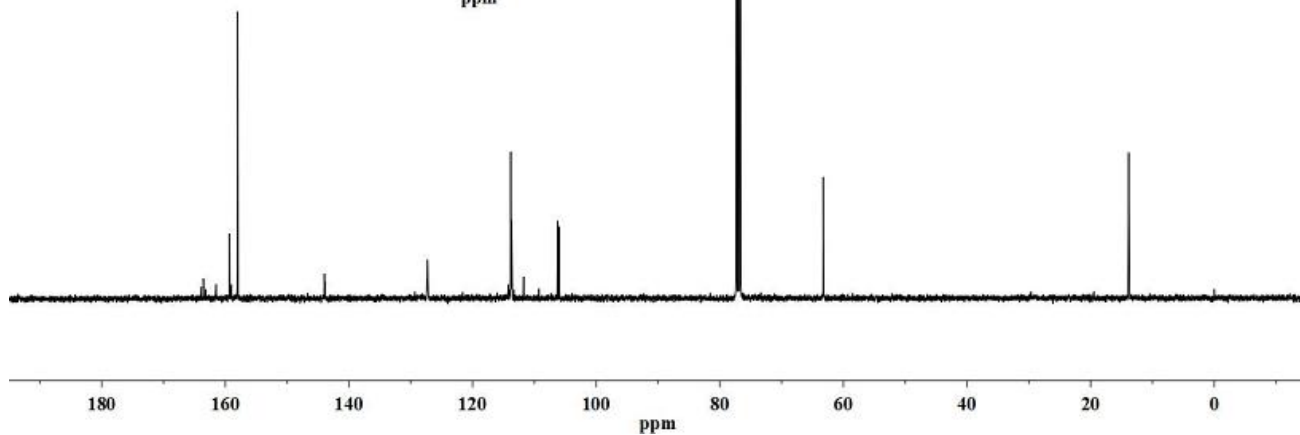

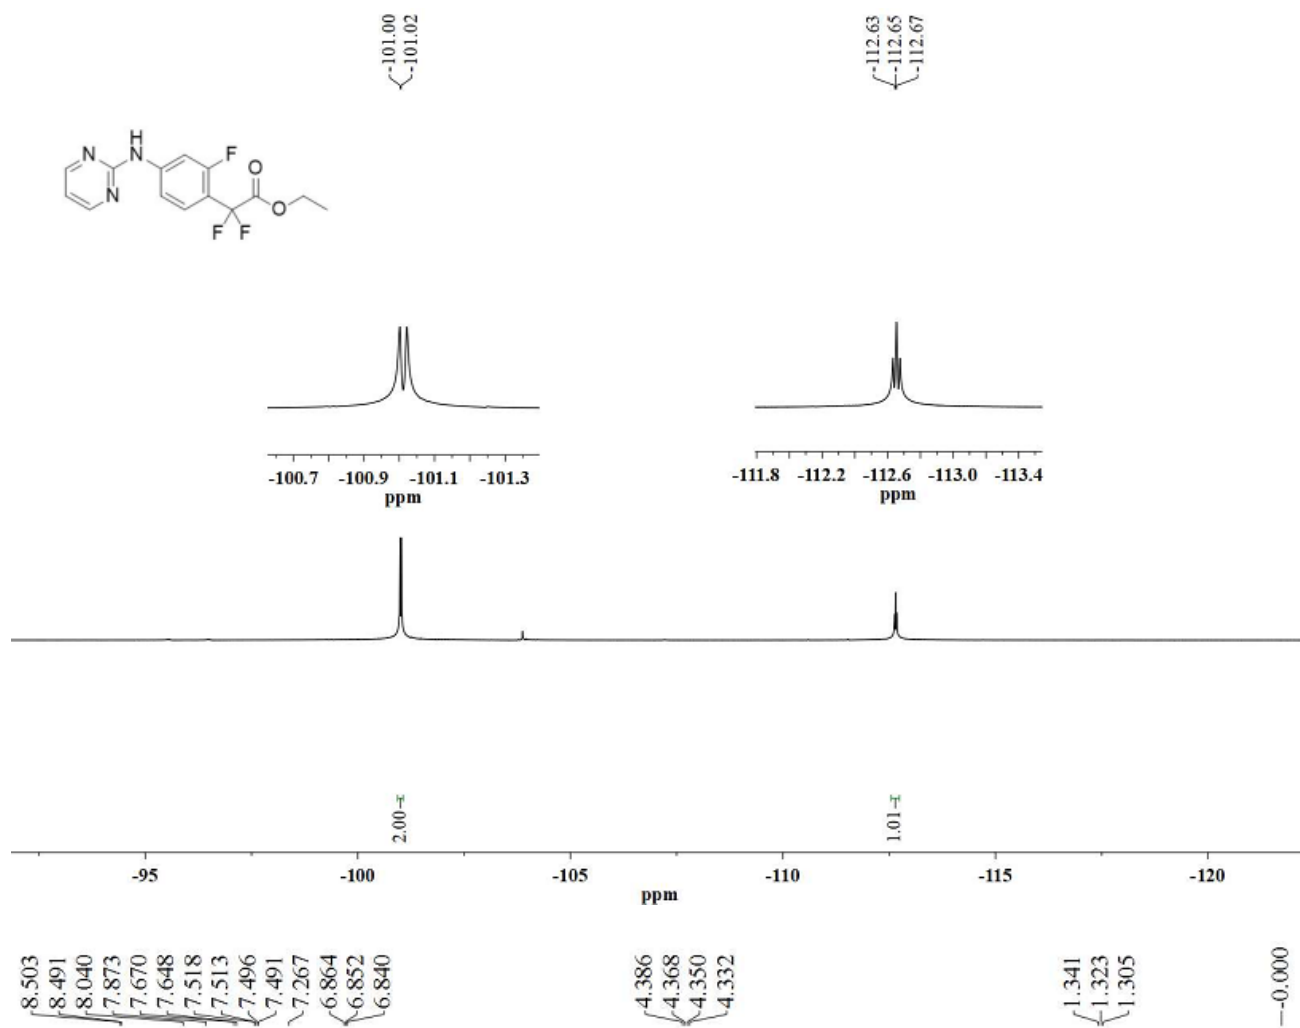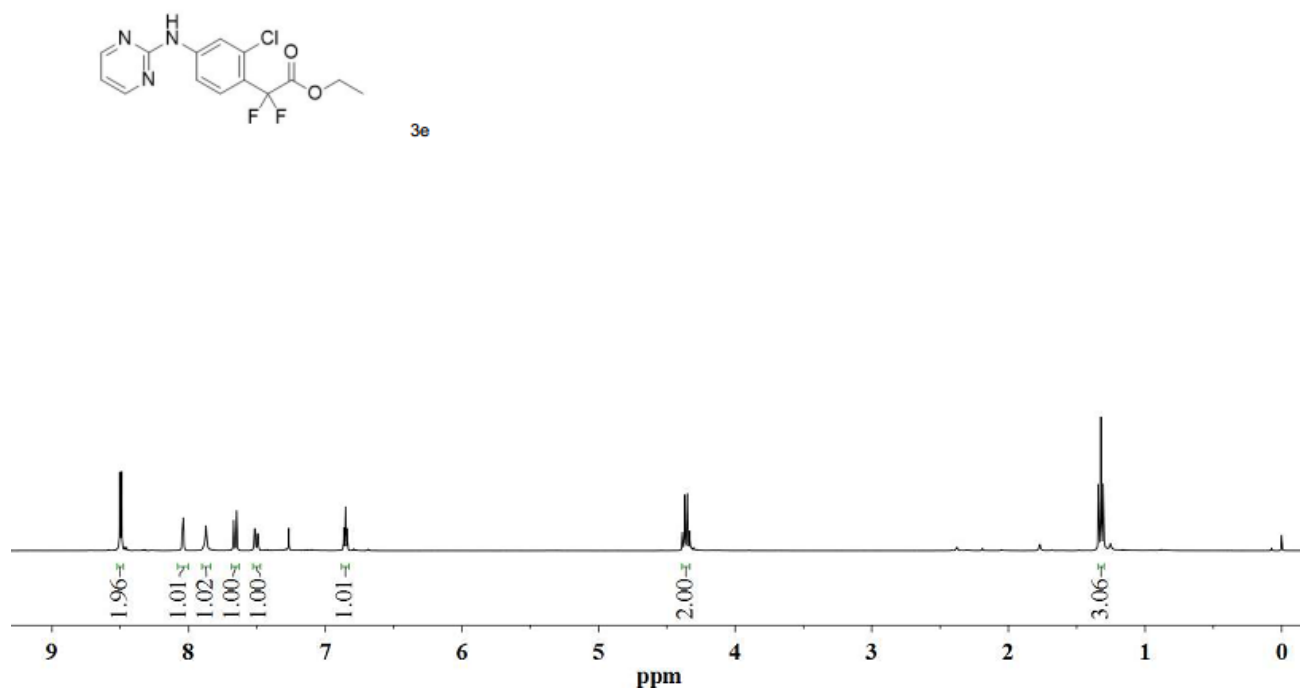

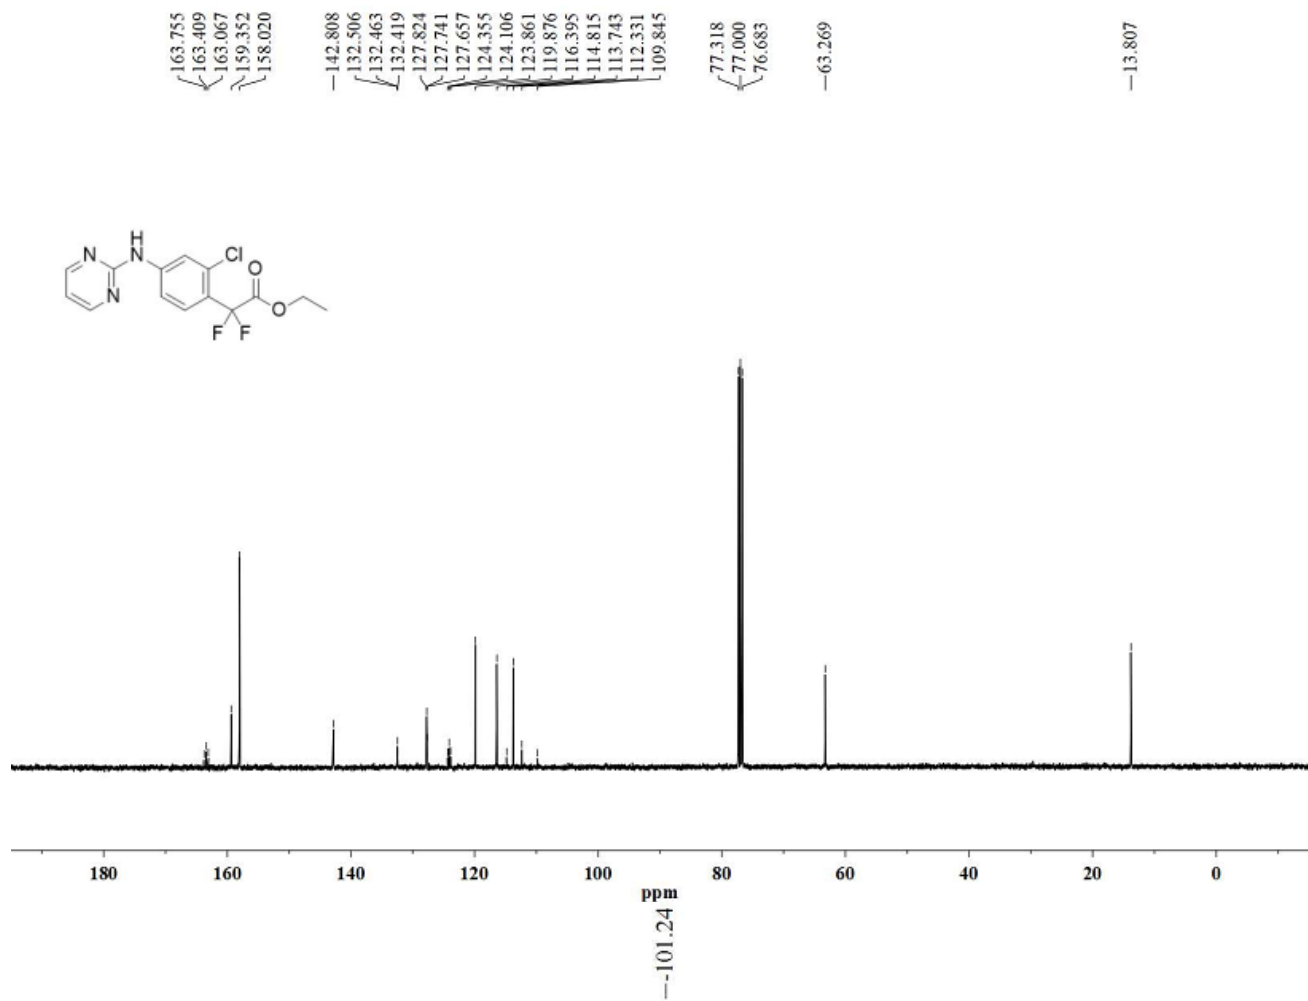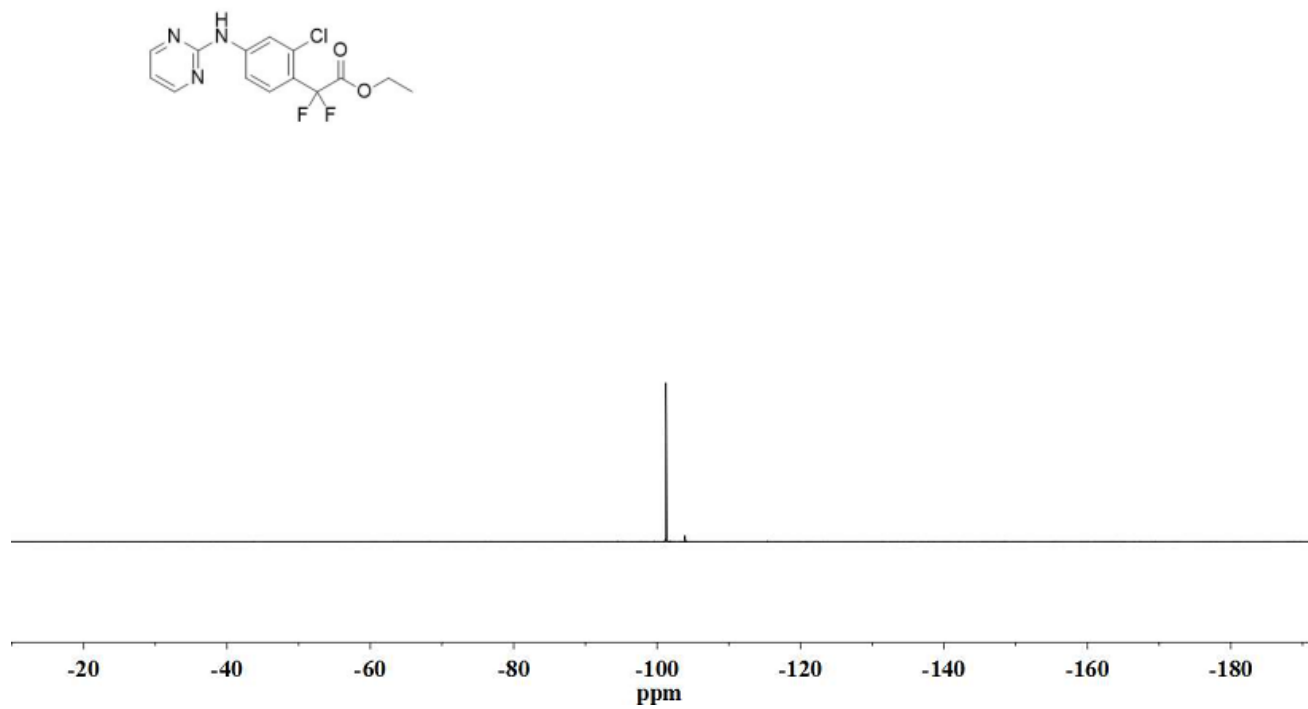

8.504  
8.492  
8.181  
8.050  
7.667  
7.645  
7.609  
7.588  
7.269  
6.864  
6.852  
6.840

4.390  
4.373  
4.355  
4.337

1.349  
1.332  
1.314

-0.000

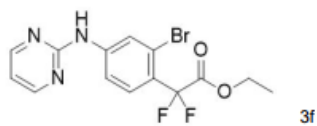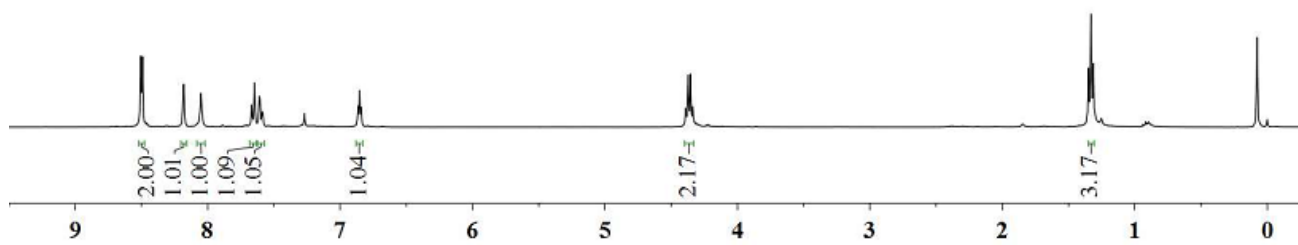

163.719  
163.373  
163.030  
159.421  
158.080  
-142.835  
128.196  
128.109  
128.021  
126.045  
125.801  
125.555  
123.333  
120.801  
120.761  
120.719  
116.981  
115.437  
113.786  
112.949  
110.462  
77.391  
77.073  
76.755  
-63.374  
-13.882

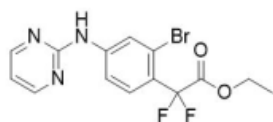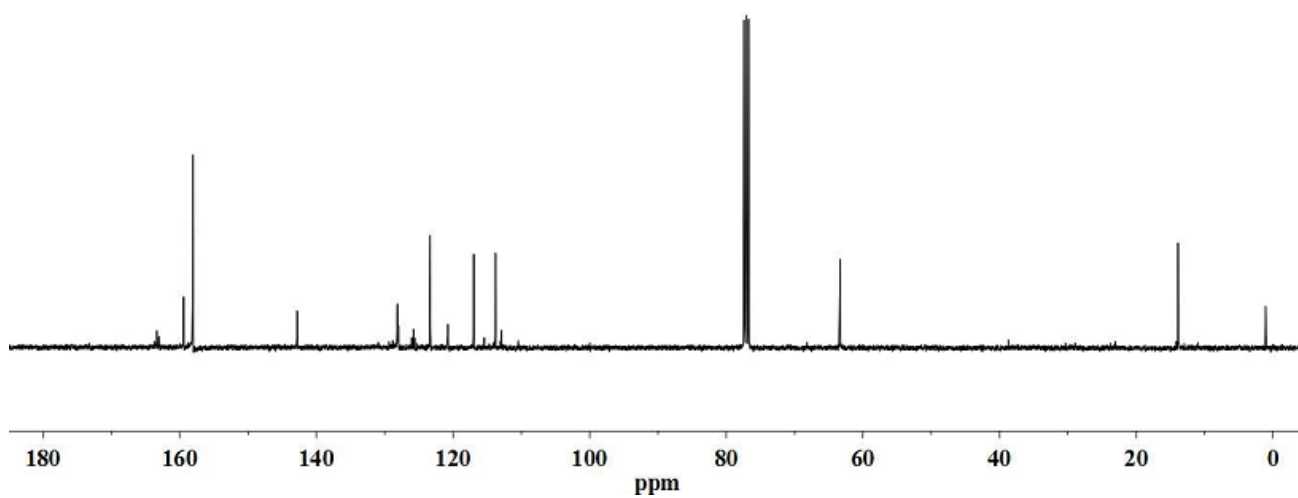

-100.62

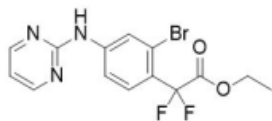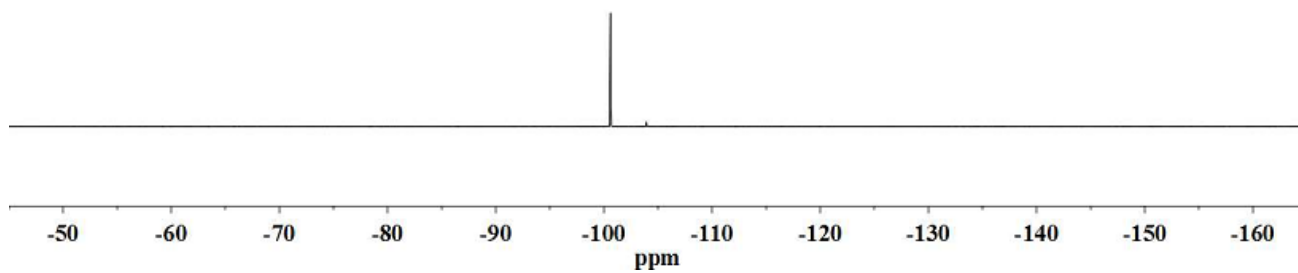

8.486  
8.474  
7.946  
7.731  
7.636  
7.615  
7.519  
7.498  
7.269  
6.832  
6.820  
6.808  
4.375  
4.357  
4.339  
4.322  
-2.467  
1.343  
1.325  
1.307  
-0.000

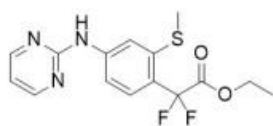

3g

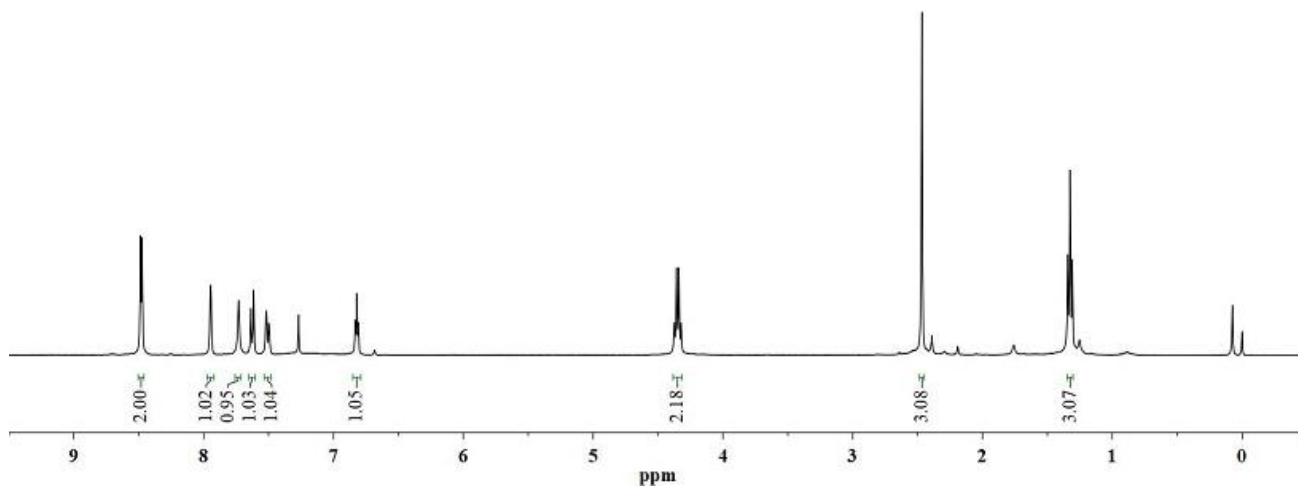

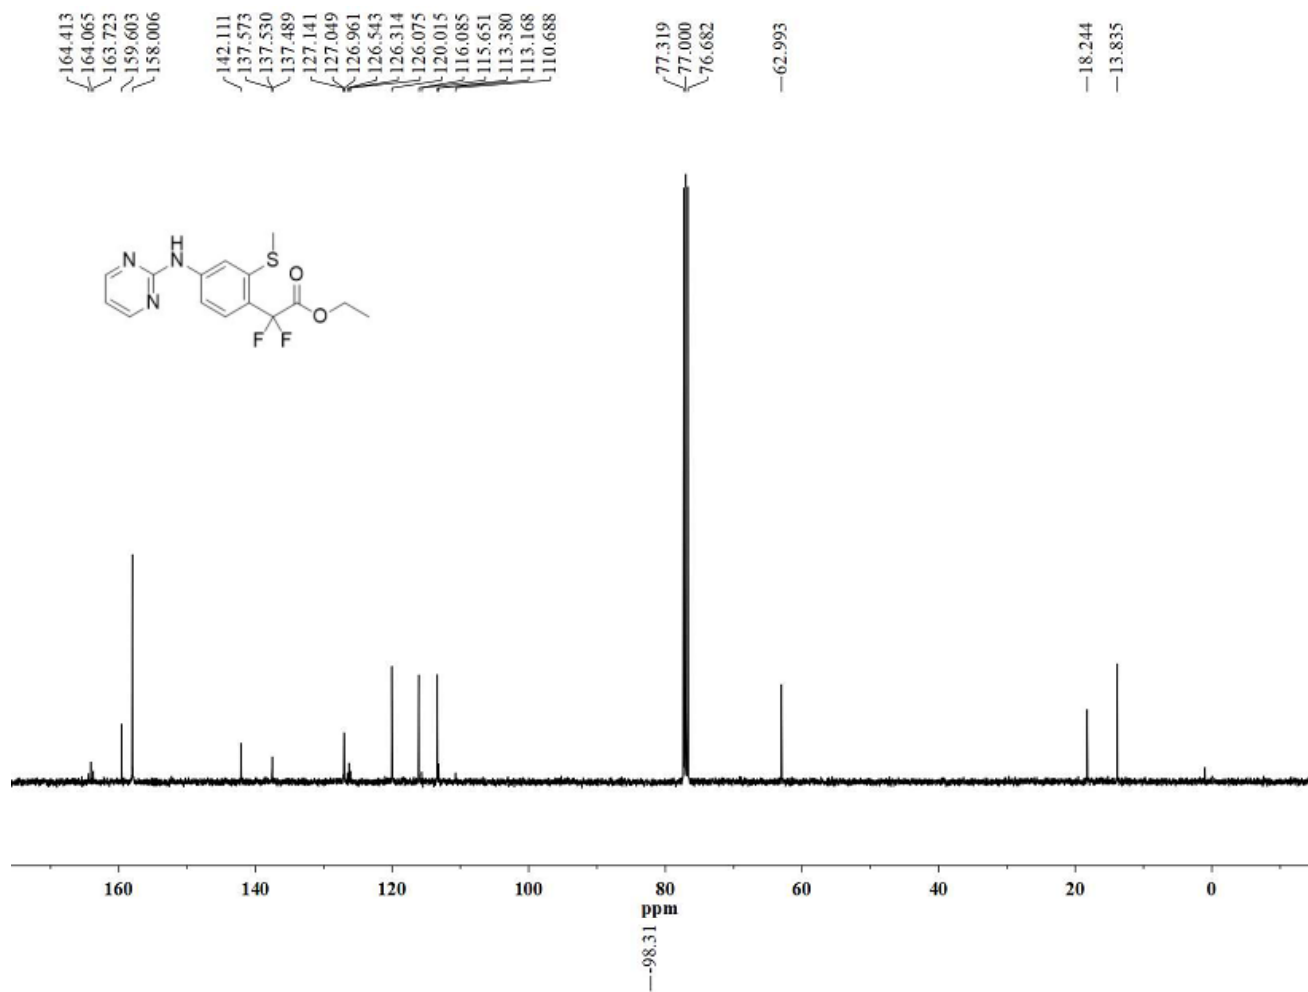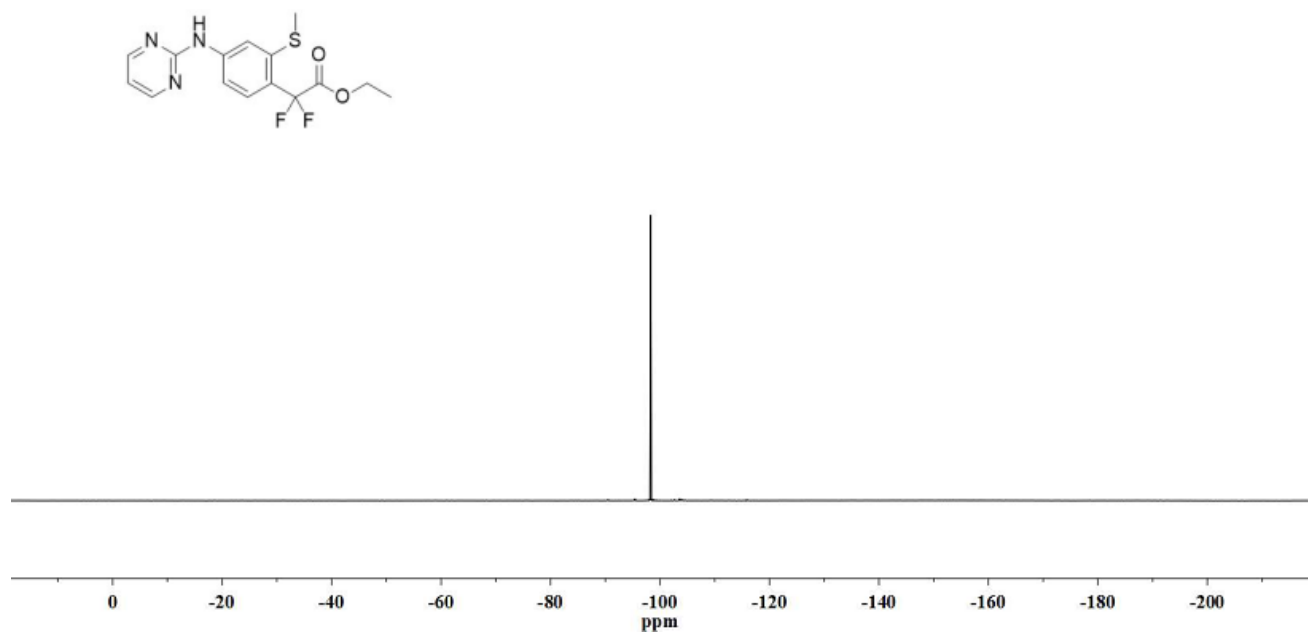



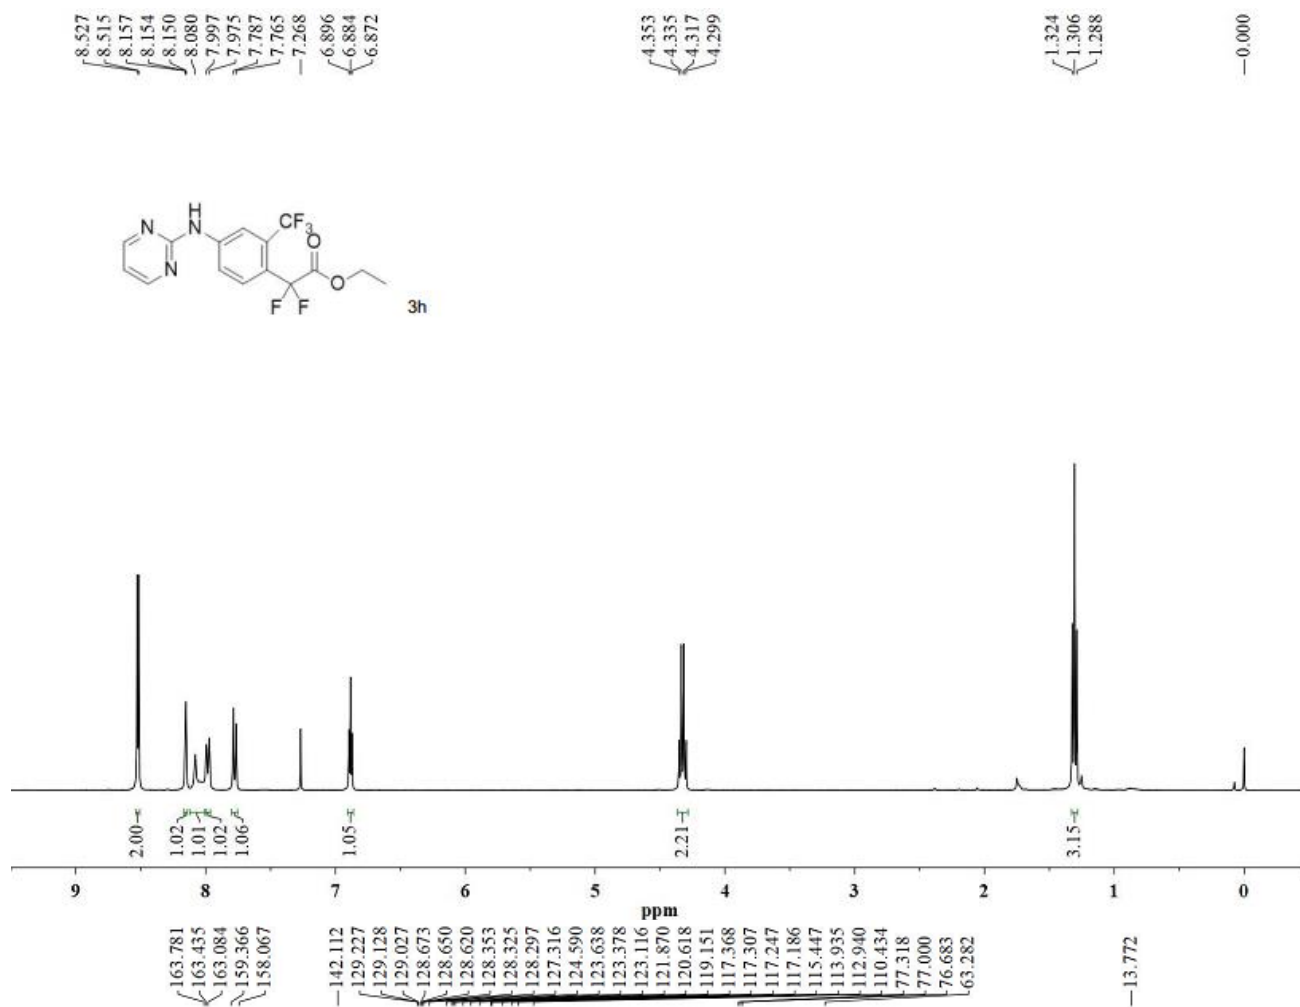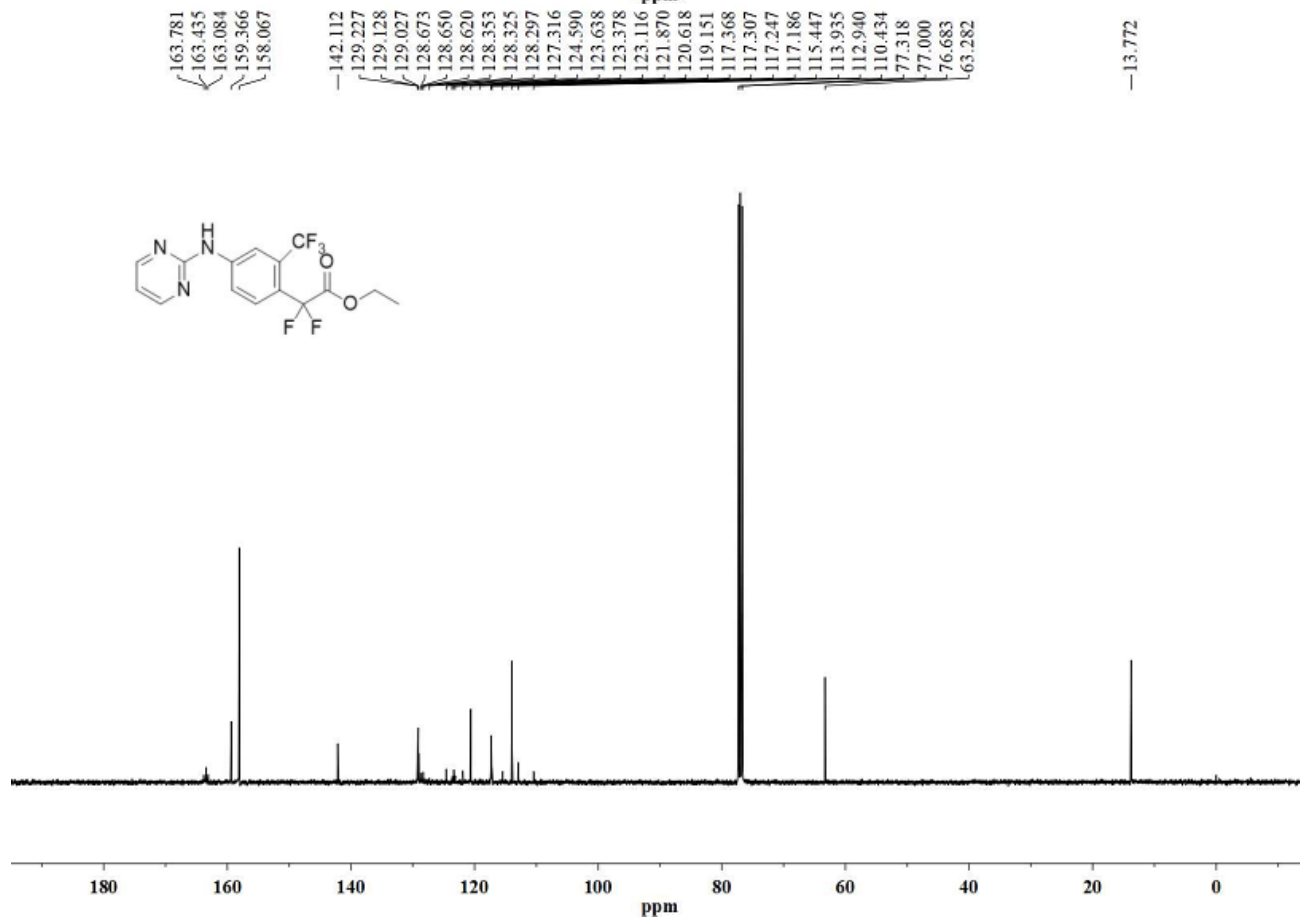

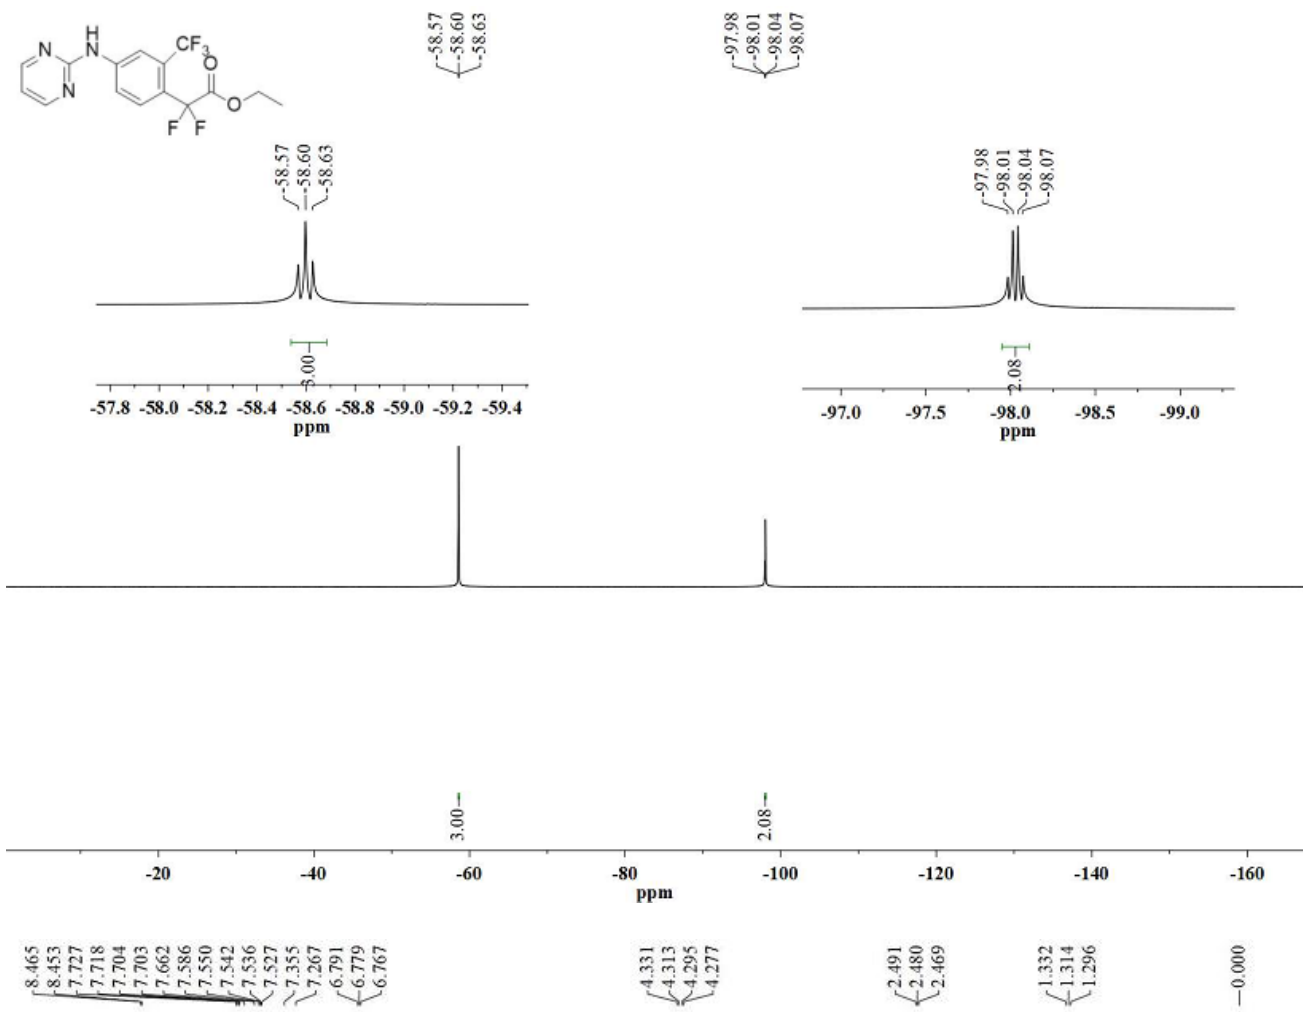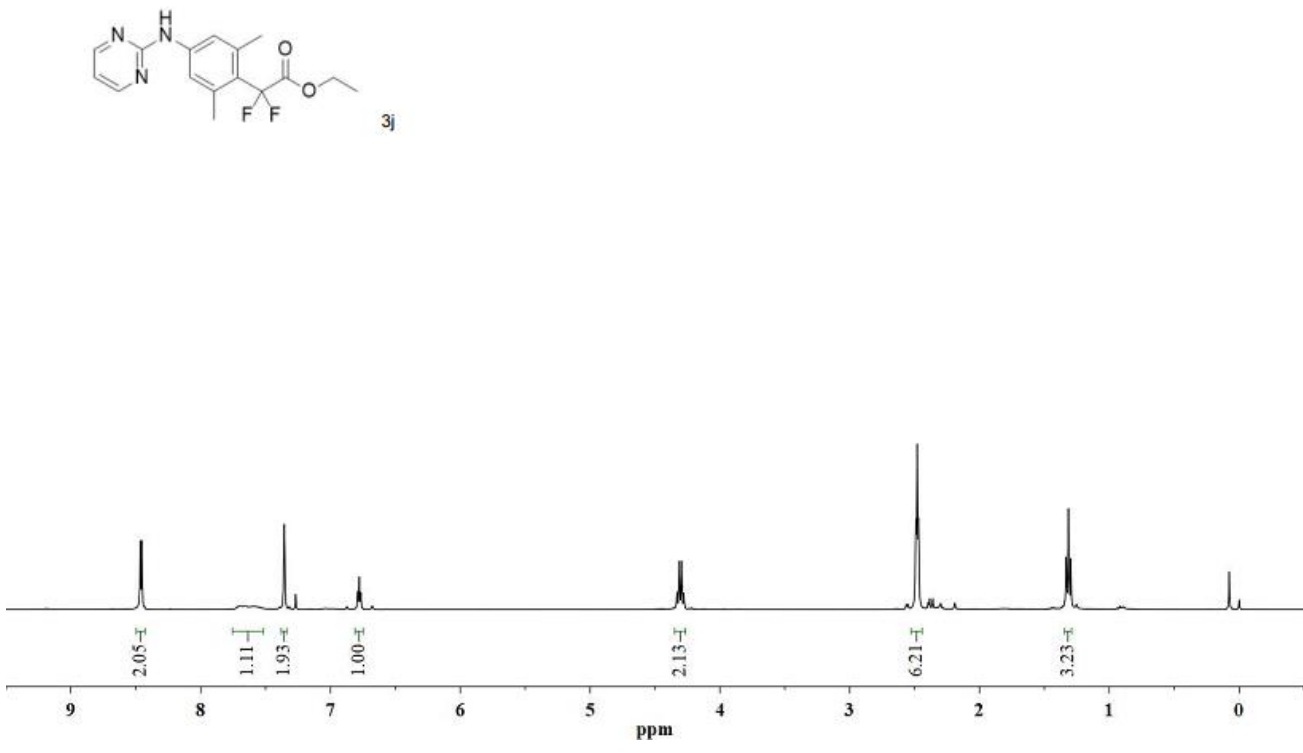

164.917  
164.559  
164.200  
159.786  
157.980  
140.526  
138.910  
138.878  
138.845  
123.715  
123.488  
123.261  
120.891  
120.080  
118.621  
116.106  
113.591  
112.978

77.318  
77.000  
76.682

-62.940

22.033  
21.975  
21.916  
-13.834

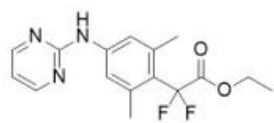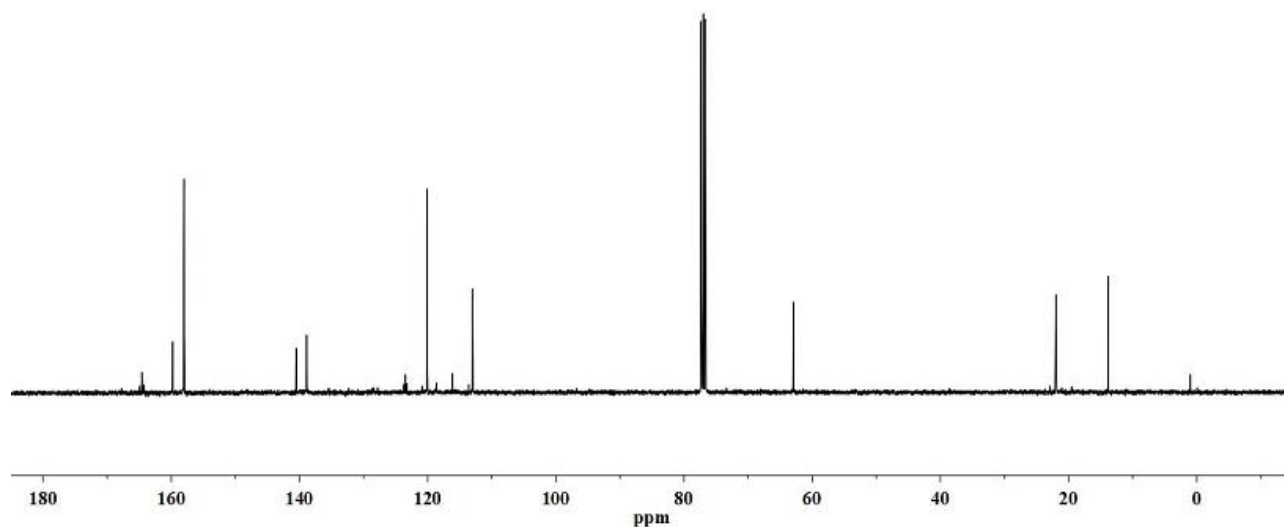

ppm

-94.31

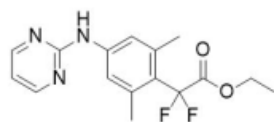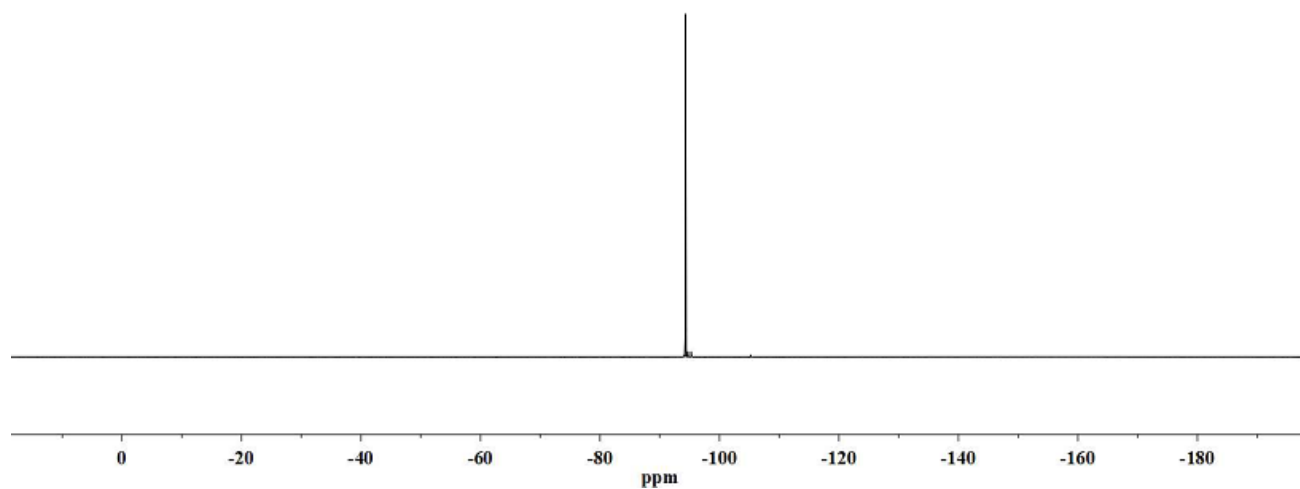

ppm

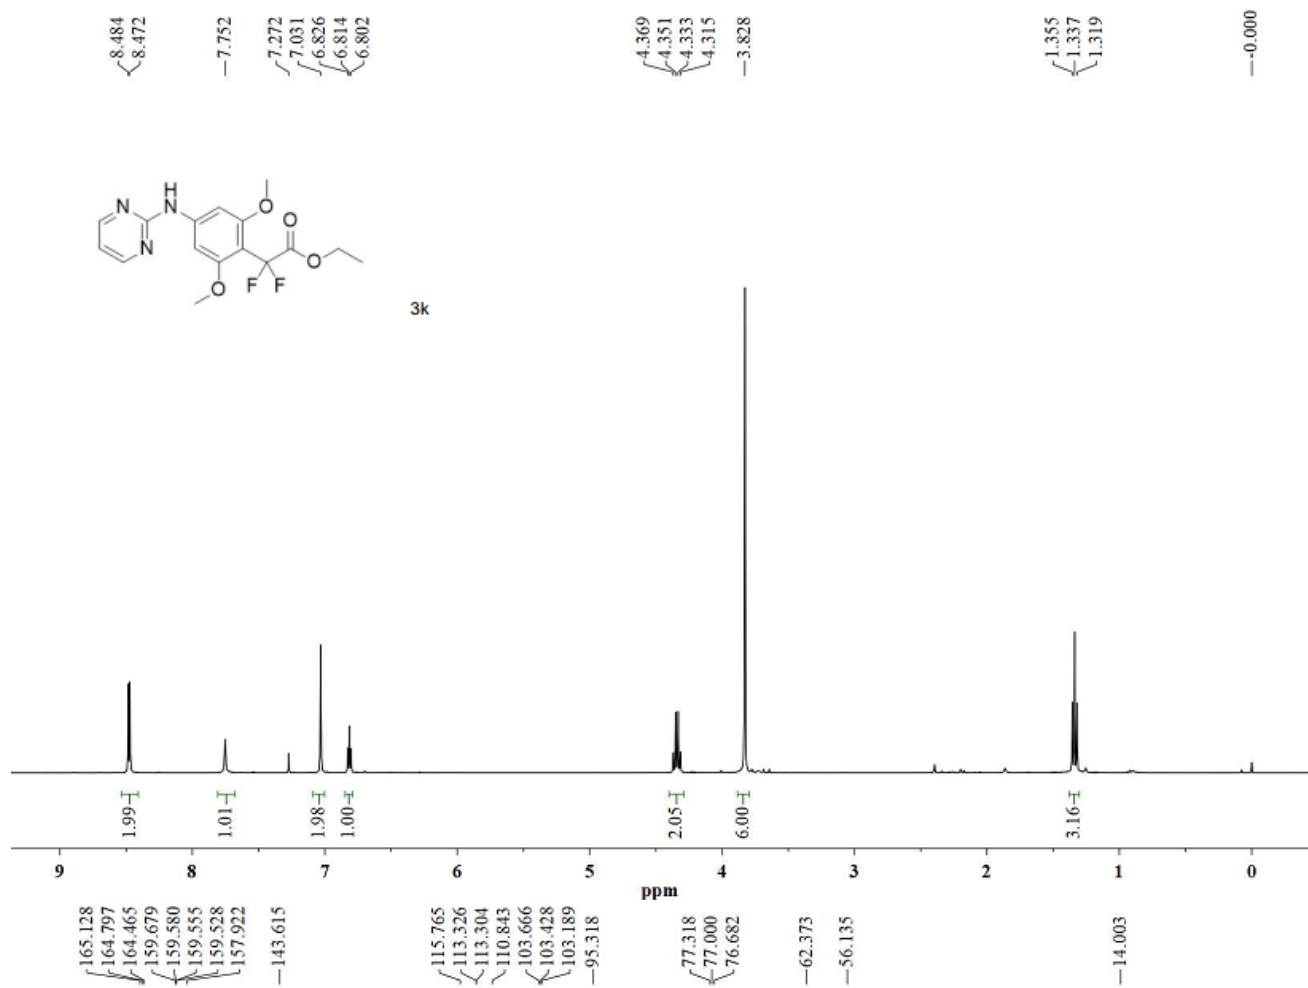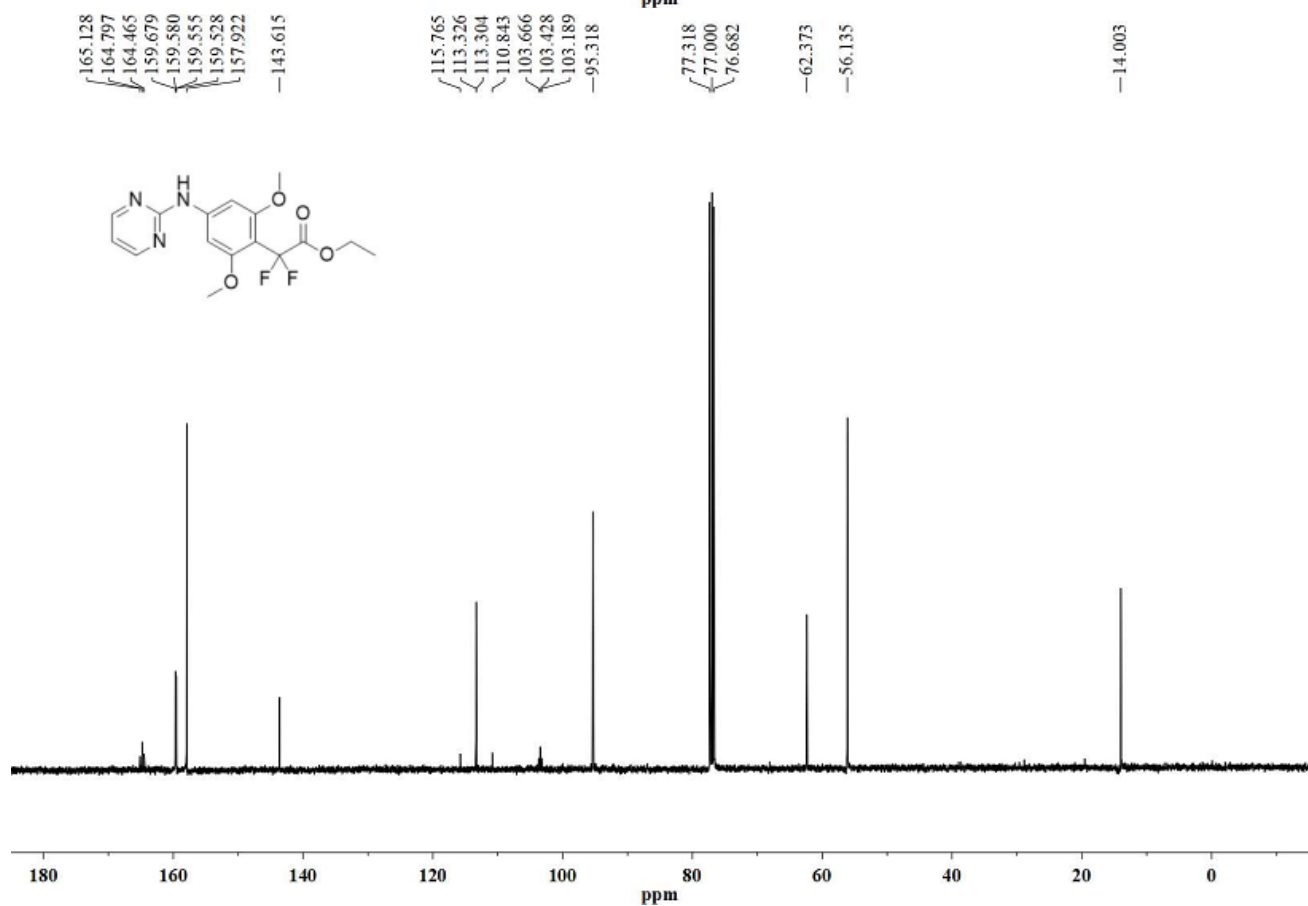

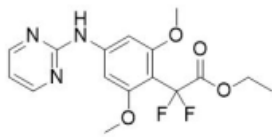

-96.39

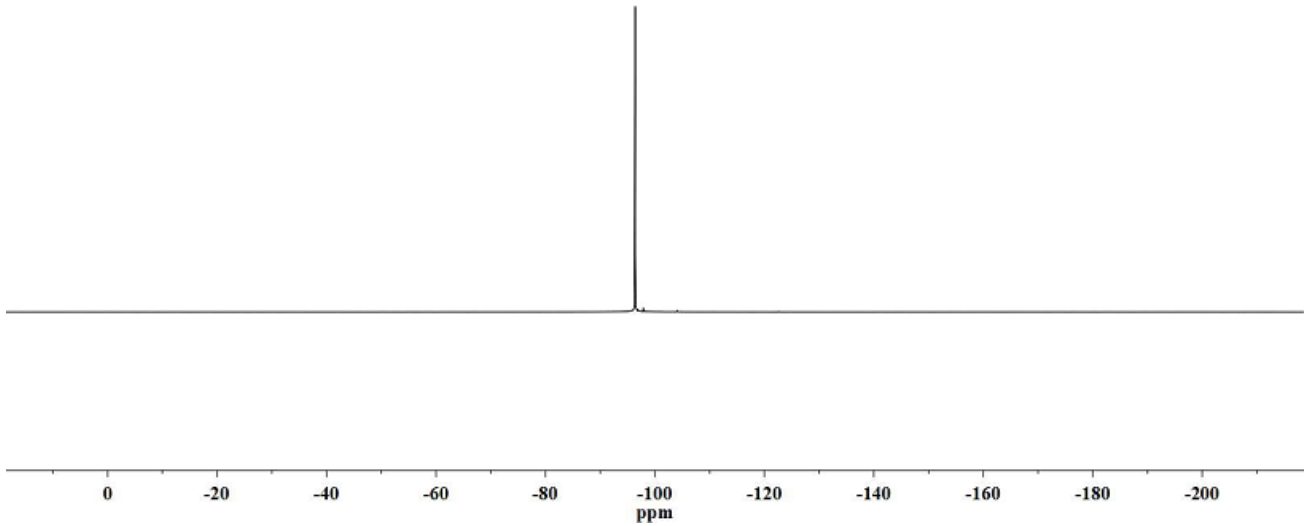

8.384  
8.373  
7.990  
7.970  
7.448  
7.428  
7.359  
7.339  
7.319  
7.278  
7.270  
6.731  
6.720  
6.708  
4.348  
4.330  
4.312  
4.294  
-2.344  
-1.329  
-1.311  
-1.293  
-0.000

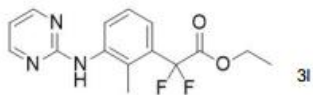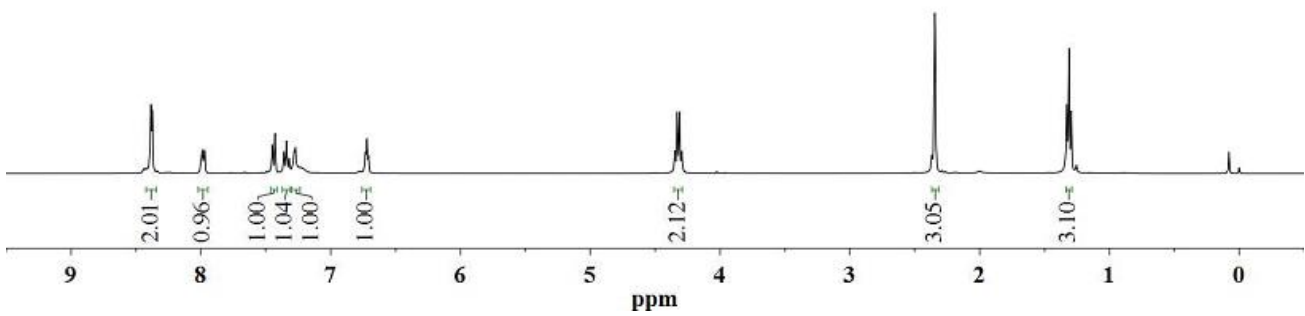

2.01  
0.96  
1.00  
1.04  
1.00  
1.00  
2.12  
3.05  
3.10



8.601  
8.597  
8.581  
8.472  
8.460  
7.606  
7.349  
7.345  
7.329  
7.325  
7.285  
7.270  
7.265  
7.245  
6.807  
6.795  
6.783

4.376  
4.358  
4.340  
4.322  
-3.812

1.328  
1.310  
1.292

-0.000

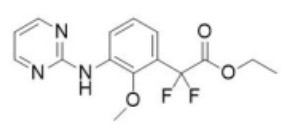

3m

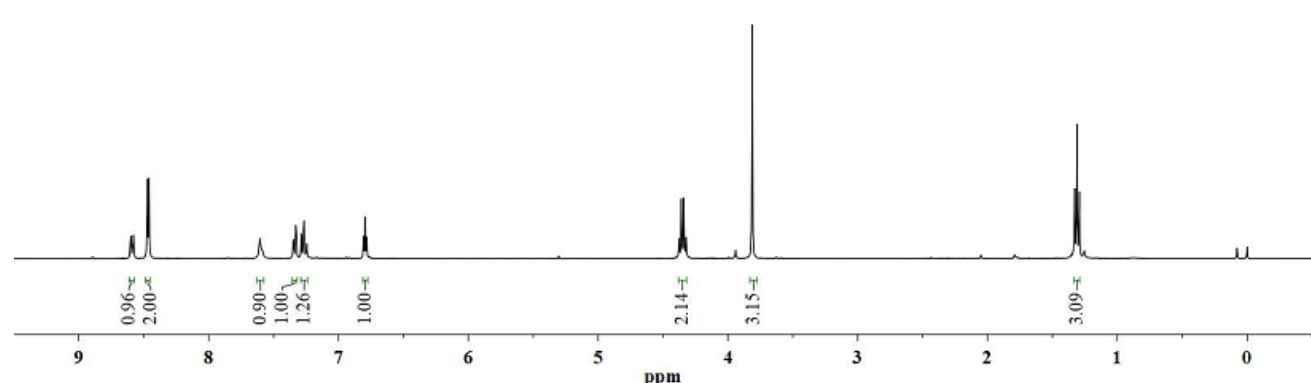

164.051  
163.716  
163.380  
159.691  
158.068  
146.509  
146.457  
146.404  
133.318  
127.357  
127.106  
126.856  
124.709  
122.930  
119.316  
119.244  
119.173  
114.489  
113.192  
112.021  
109.553

ppm

77.318  
77.001  
76.683  
62.921  
61.990

-13.841

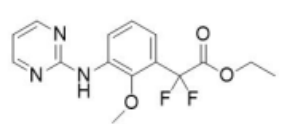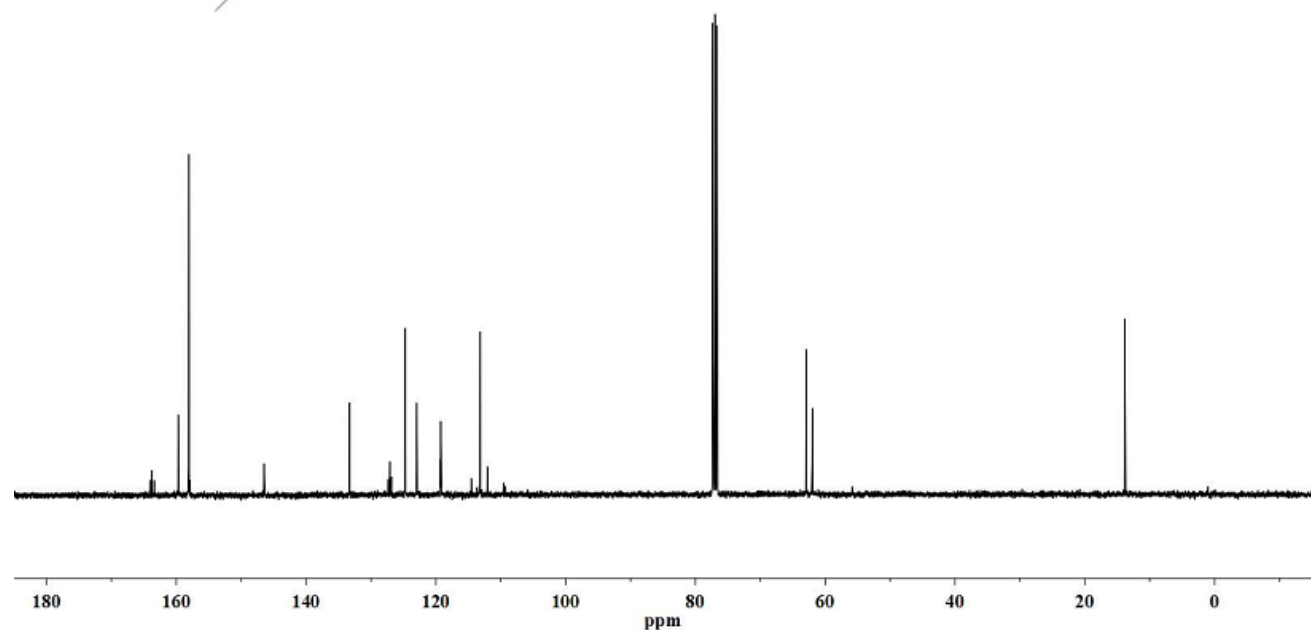

ppm

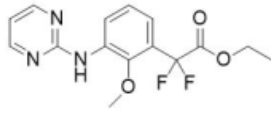

-100.04

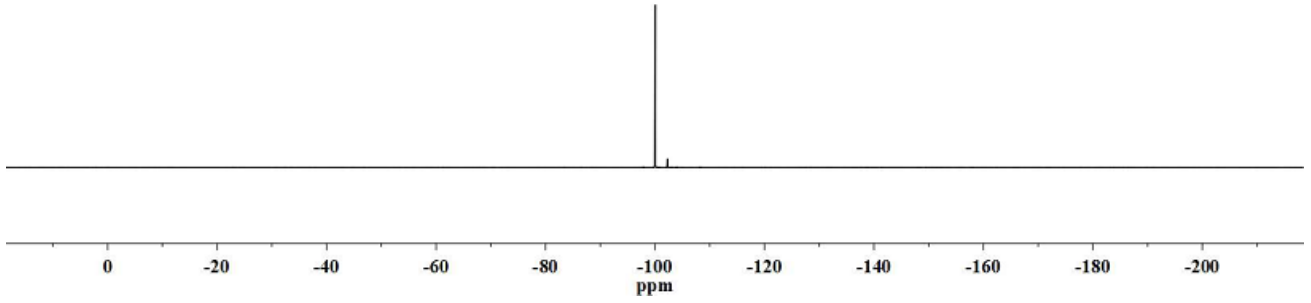

8.750  
8.737  
8.725  
8.488  
8.476  
7.703  
7.433  
7.420  
7.270  
6.853  
6.841  
6.829  
4.389  
4.371  
4.353  
4.335  
1.335  
1.317  
1.300  
0.000

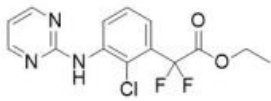

3o

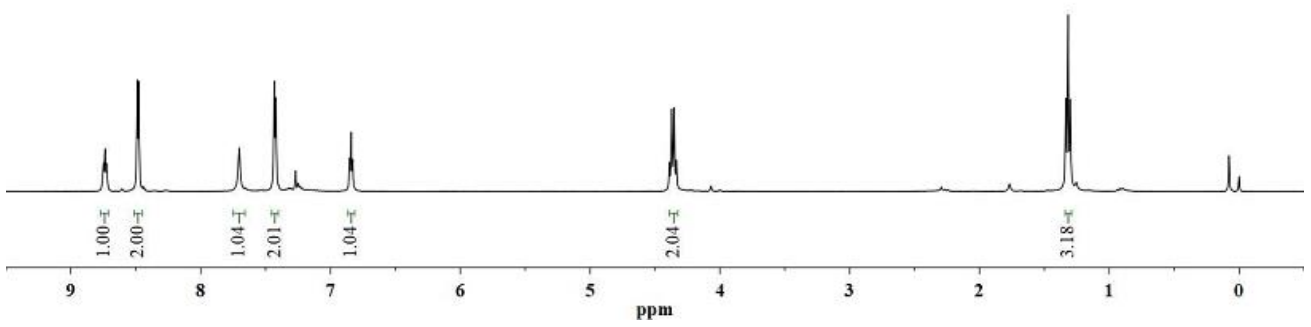



163.521  
 163.184  
 162.846  
 159.393  
 158.032  
 137.014  
 131.685  
 131.443  
 131.200  
 127.183  
 122.680  
 120.389  
 120.300  
 120.212  
 119.793  
 119.749  
 119.707  
 114.653  
 113.830  
 112.162  
 109.669

63.383

13.788

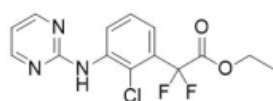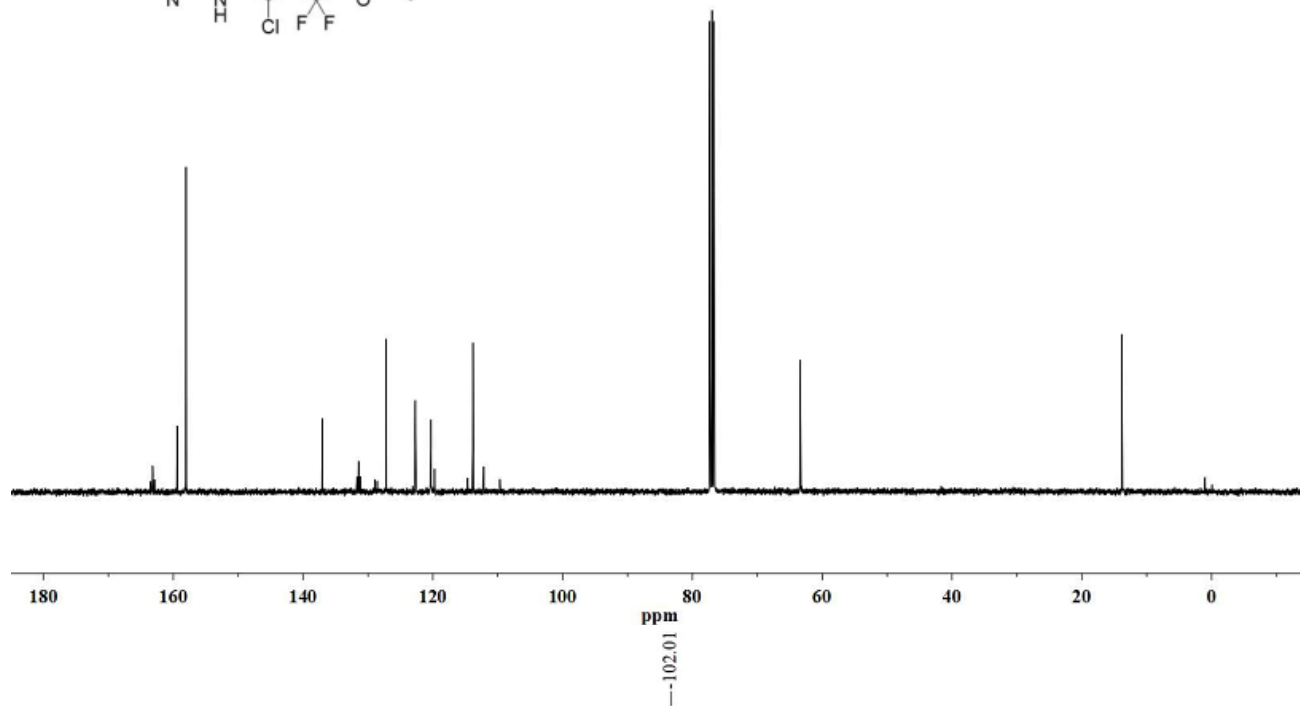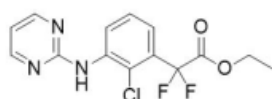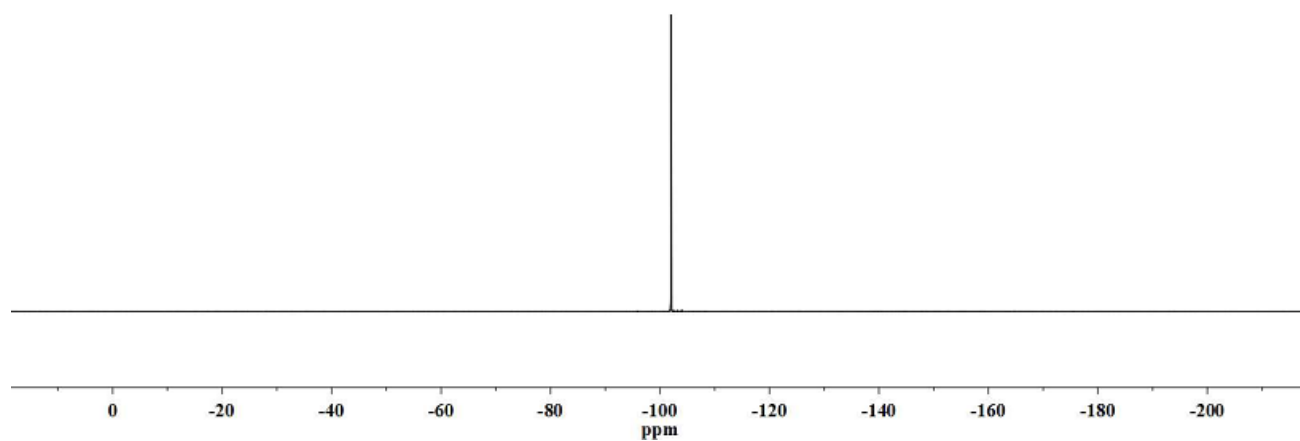

8.677  
8.672  
8.657  
8.652  
8.490  
8.478  
7.746  
7.488  
7.468  
7.449  
7.443  
7.438  
7.423  
7.418  
7.265  
6.855  
6.843  
6.831

4.388  
4.370  
4.352  
4.335

1.341  
1.323  
1.305

-0.000

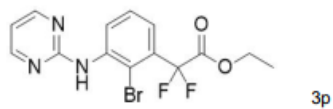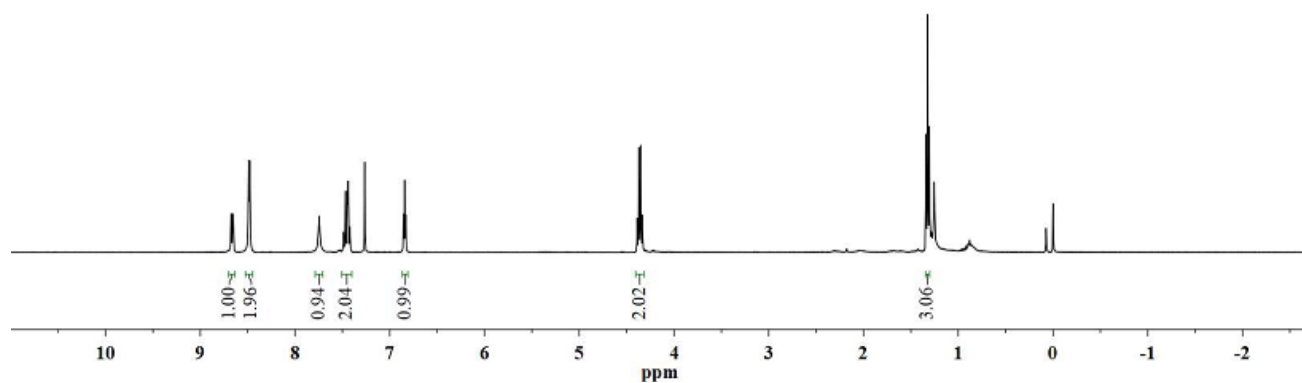

163.472  
163.133  
162.799  
159.461  
158.045

138.116  
133.605  
133.366  
133.125  
127.850  
123.114  
121.277  
121.183  
121.089  
115.271  
113.828  
112.779  
111.267  
111.227  
111.186  
110.284

77.317  
77.000 CDCl3  
76.682

-63.419

-13.811

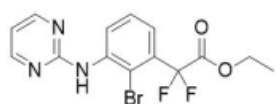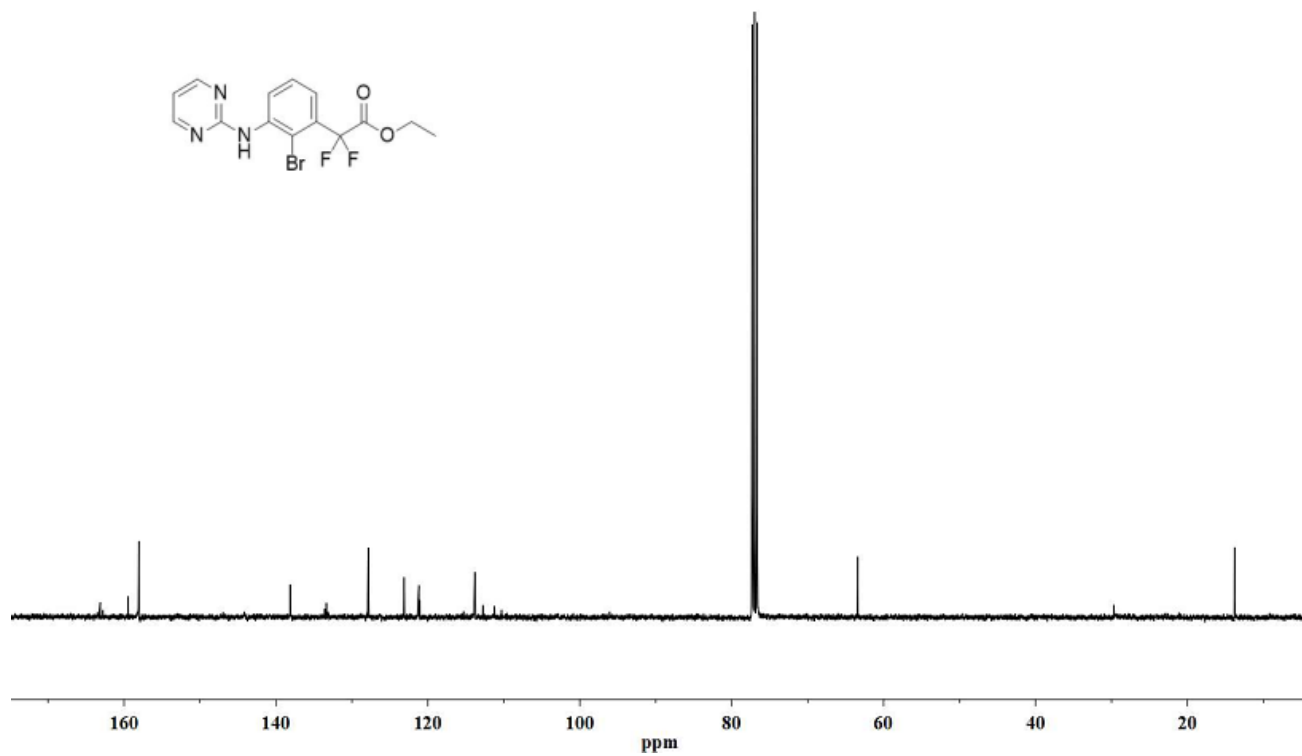

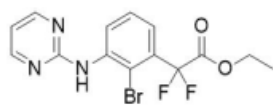

--101.21

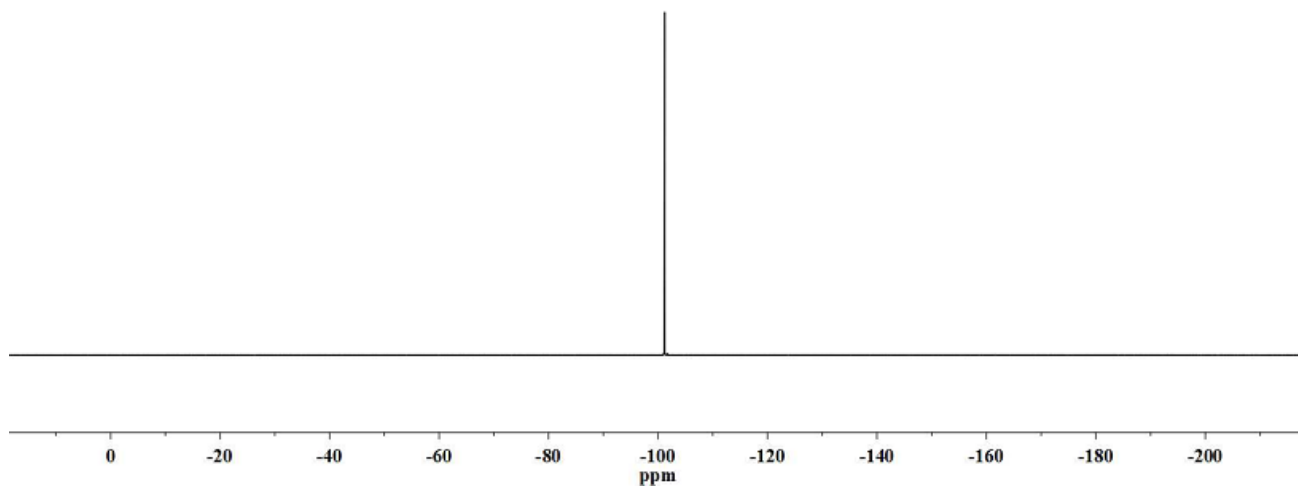

8.418  
8.406

7.871  
7.850

7.513  
7.492

7.266  
7.080

6.754  
6.742  
6.730

4.347  
4.330  
4.312  
4.294

2.335  
2.249

1.337  
1.319  
1.301

—0.000

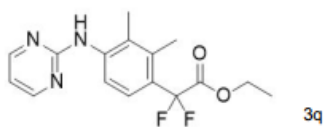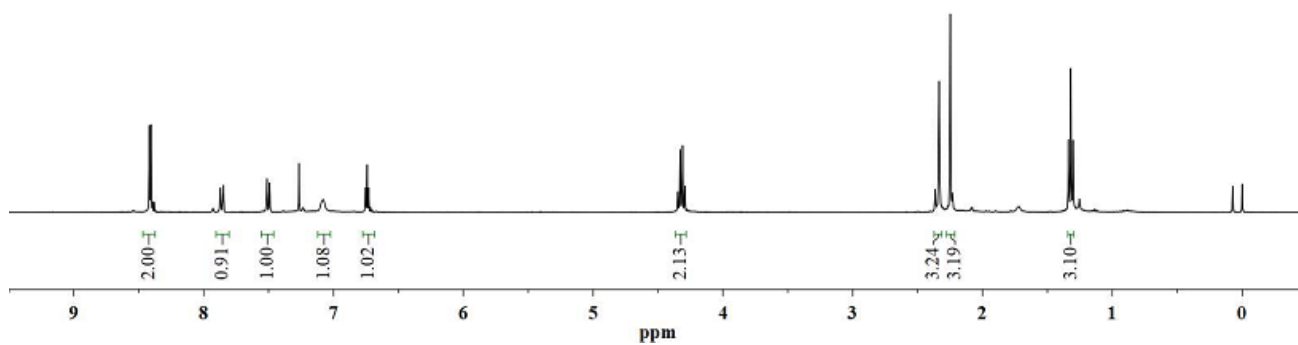

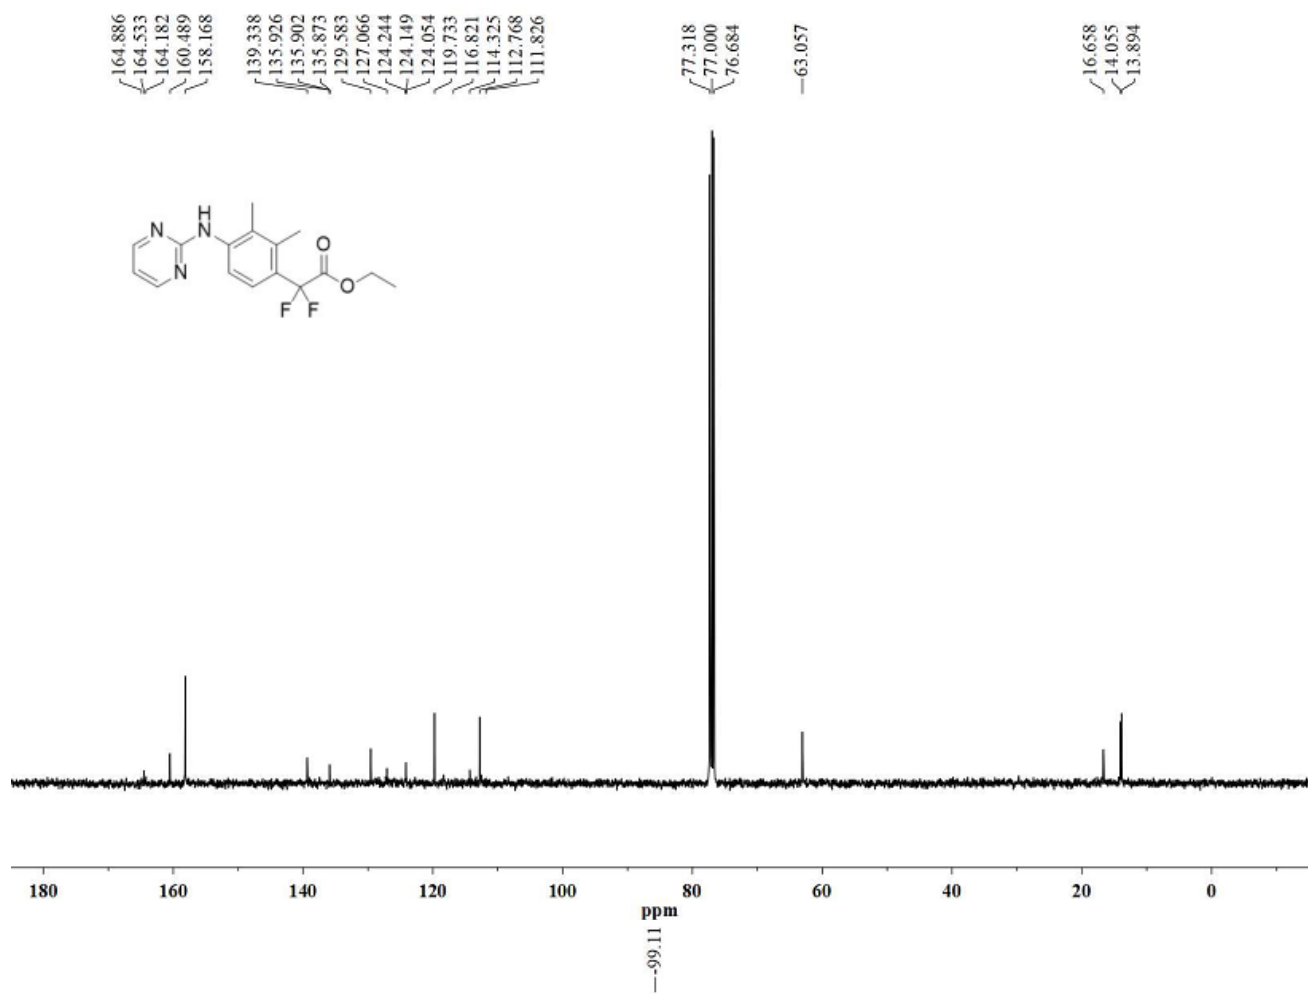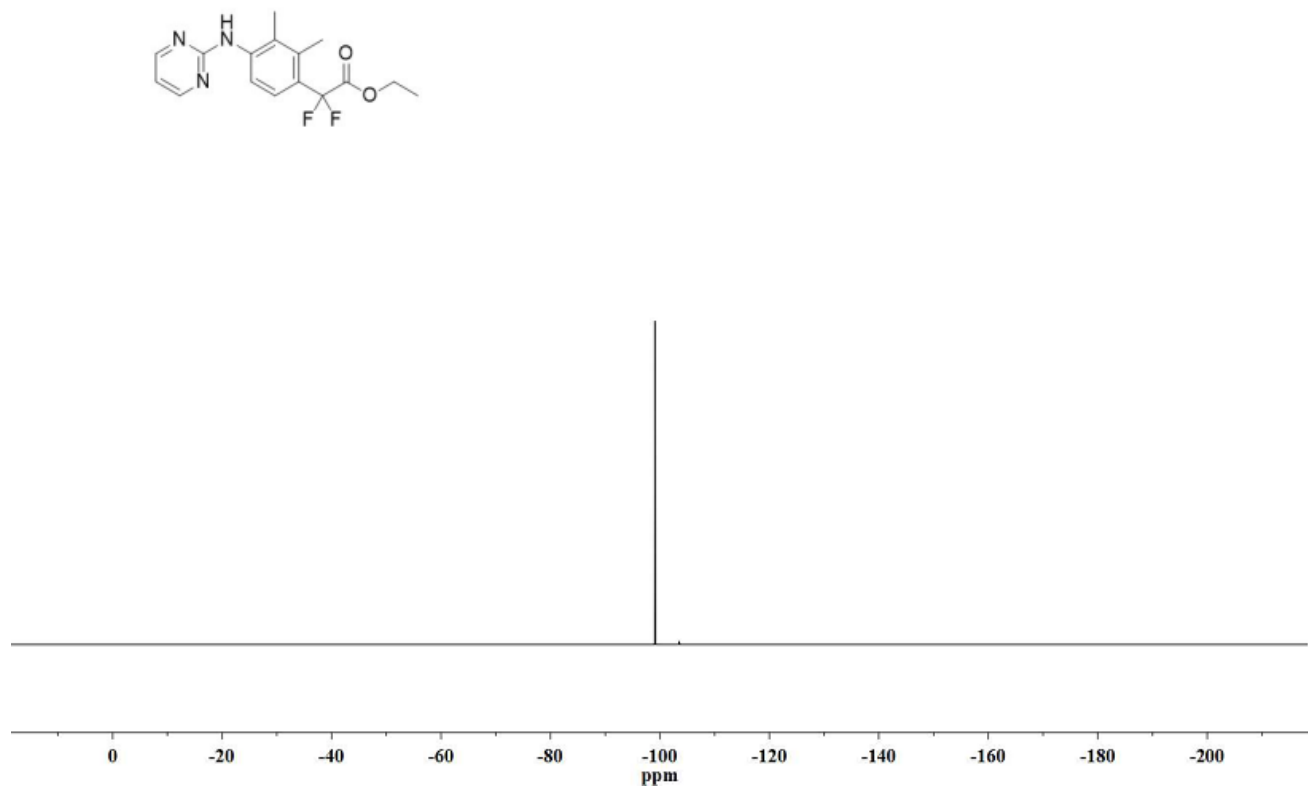

8.637  
8.368  
8.356  
8.277  
8.257  
8.210  
8.199  
8.189  
8.179  
7.913  
7.893  
7.624  
7.620  
7.607  
7.603  
7.599  
7.586  
7.582  
7.580  
7.576  
7.563  
7.558  
7.555  
7.542  
7.538  
7.259  
6.735  
6.723  
6.711  
4.315  
4.297  
4.279  
4.261

1.270  
1.253  
1.235

-0.000

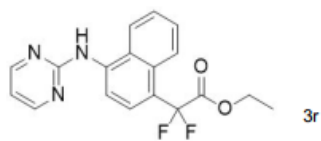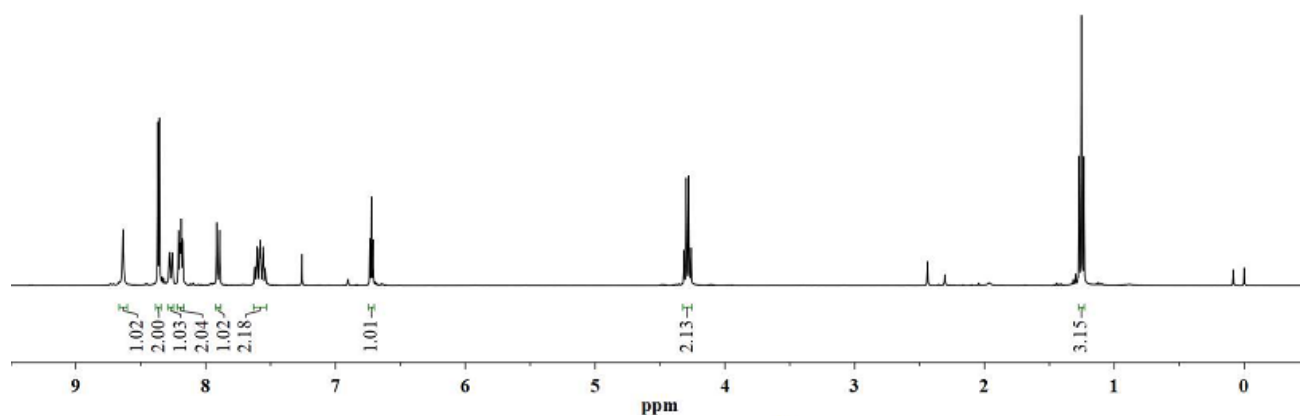

164.85  
164.50  
164.15  
160.74  
158.22

137.62  
130.39  
127.39  
127.29  
126.23  
125.49  
125.39  
125.30  
125.00  
124.97  
124.93  
124.14  
123.91  
123.67  
121.92  
117.13  
116.89  
114.39  
113.02  
111.90  
77.32  
77.00 CDCl3  
76.68  
63.21

-13.82

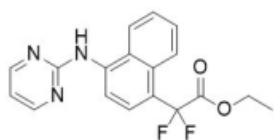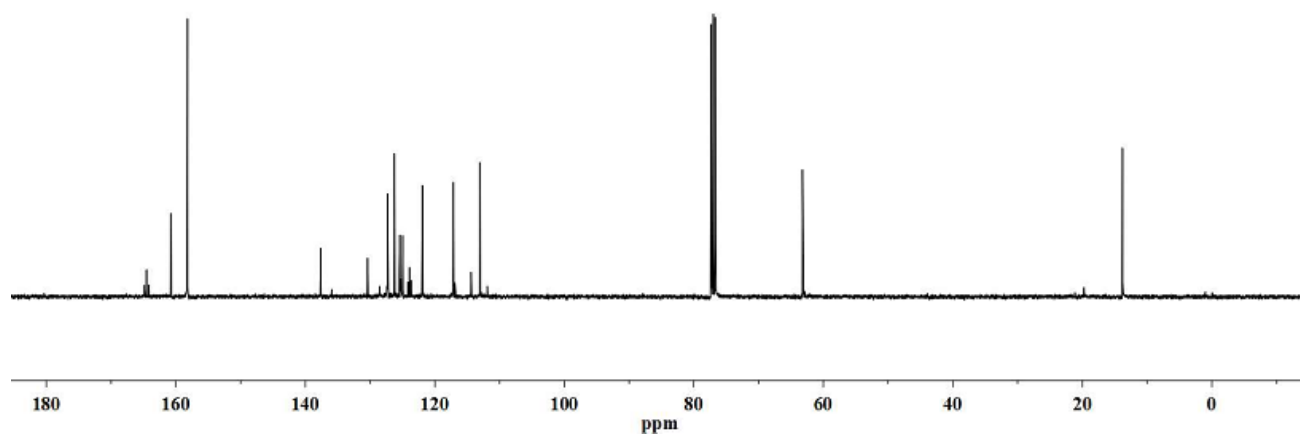

—99.36

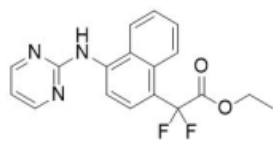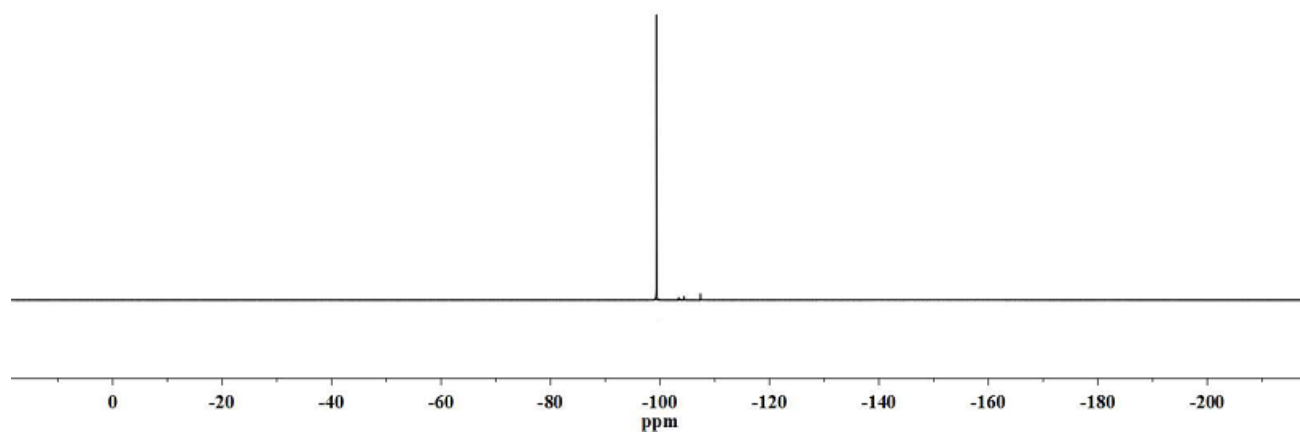

-9.124  
-7.957  
-7.936  
-7.798  
-7.795  
-7.791  
-7.785  
-7.783  
-7.765  
-7.762  
-7.629  
-7.608  
-7.579  
-7.415  
-7.412  
-7.407  
-7.405  
-7.400  
-7.395  
-7.392  
-7.384  
-7.380  
-7.374  
-7.262  
-4.338  
-4.320  
-4.302  
-4.285  
-1.342  
-1.324  
-1.306  
-0.000

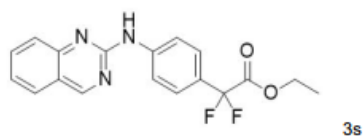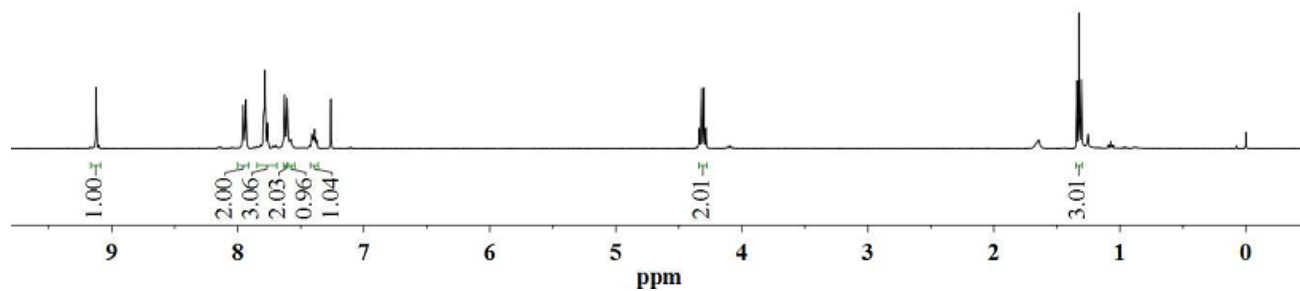

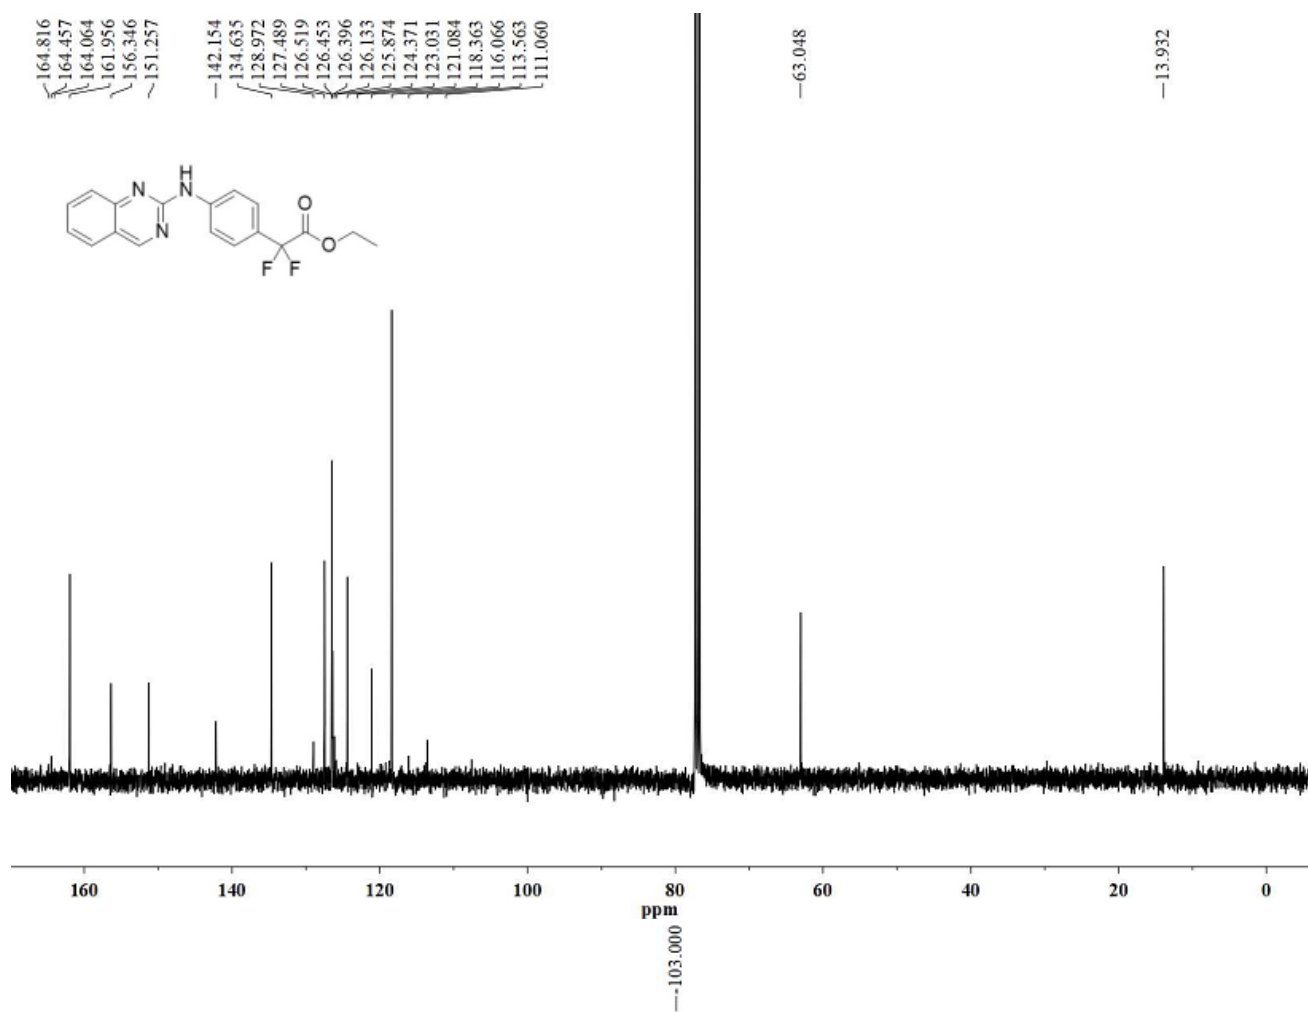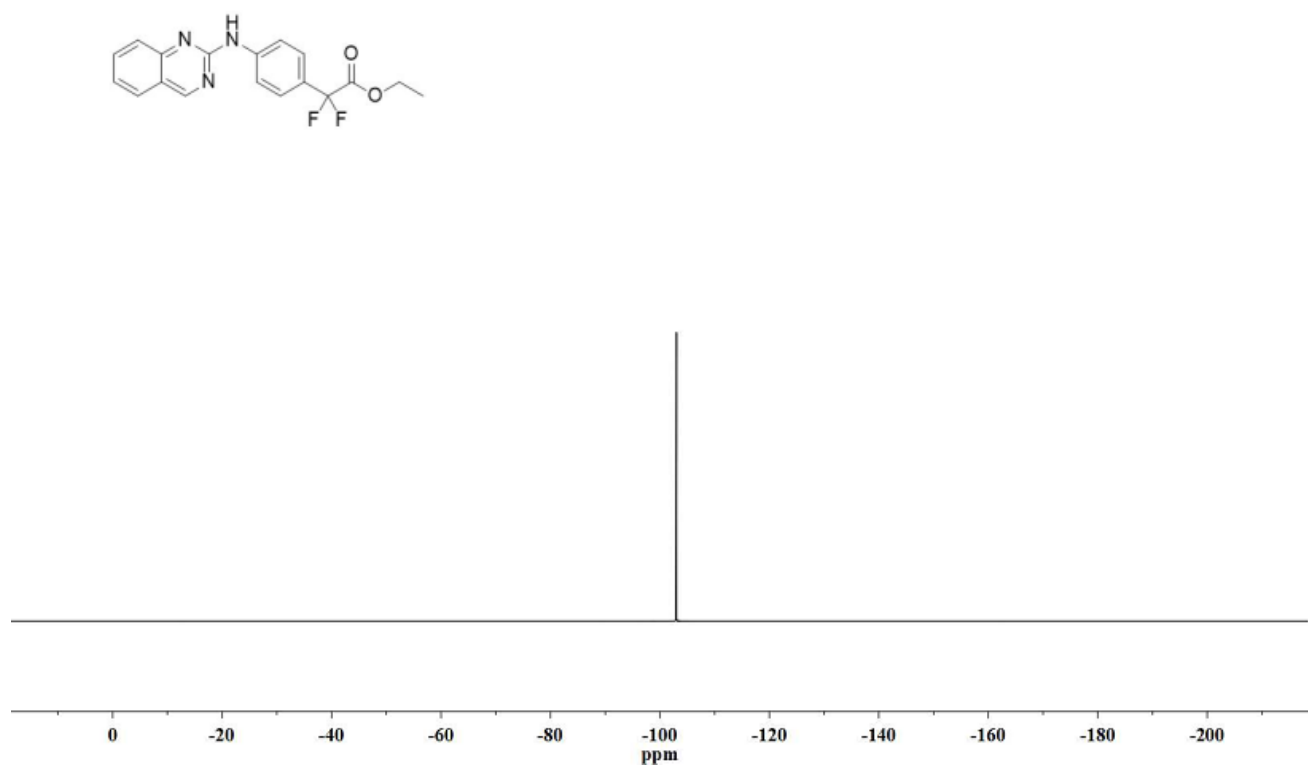

8.302  
7.725  
7.704  
7.569  
7.548  
7.467  
7.263

4.320  
4.303  
4.285  
4.267

2.223

1.328  
1.310  
1.292

0.000

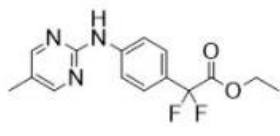

3t

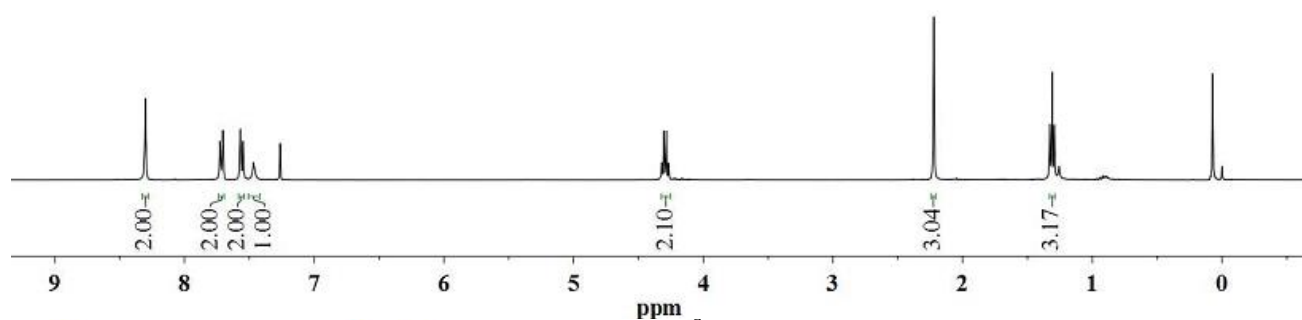

164.782  
164.423  
164.064  
158.047  
157.916  
142.289  
136.250  
126.458  
126.398  
126.337  
125.726  
122.022  
118.126  
116.024  
113.526  
111.027

ppm

77.317  
77.000  
76.682

62.990

14.855  
13.894

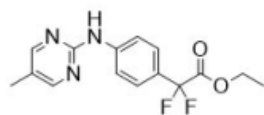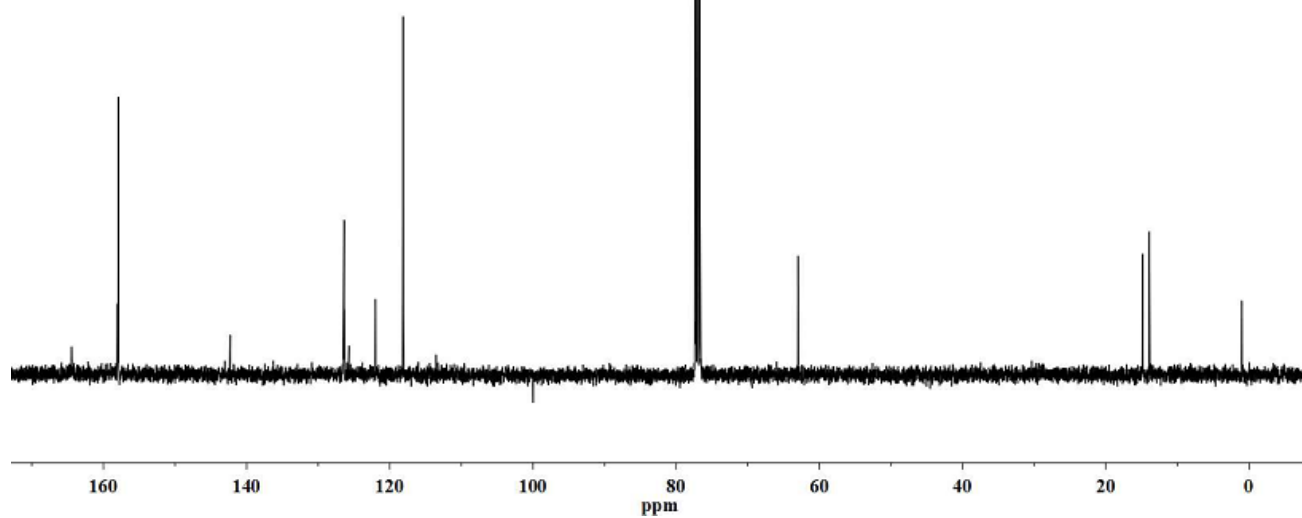

ppm



--102.976

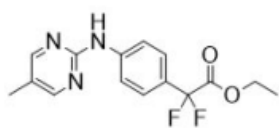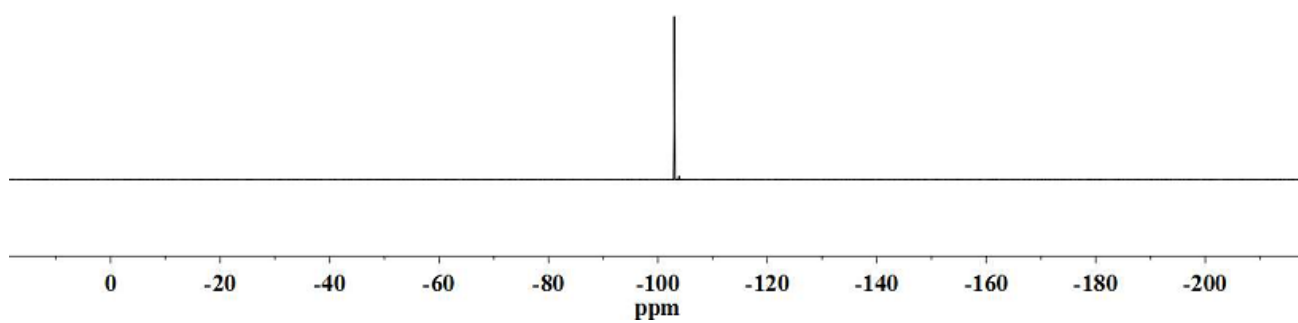

8.404  
7.708  
7.687  
7.596  
7.575  
7.448  
7.267

4.328  
4.311  
4.293  
4.275

1.335  
1.318  
1.300

-0.000

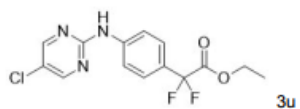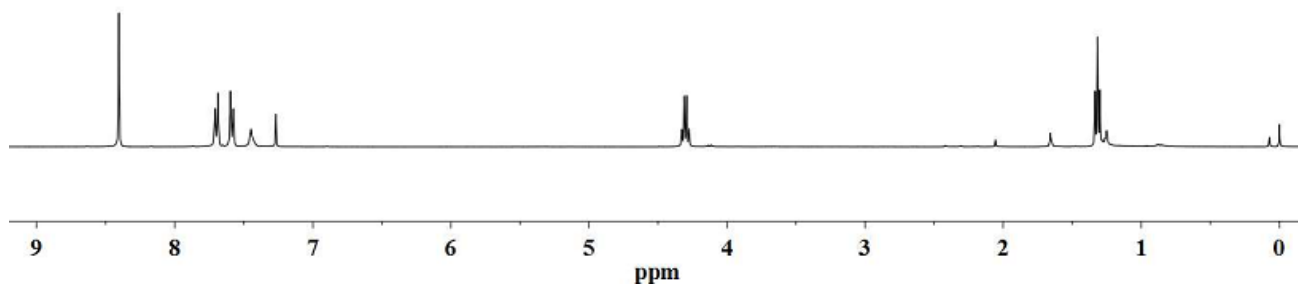

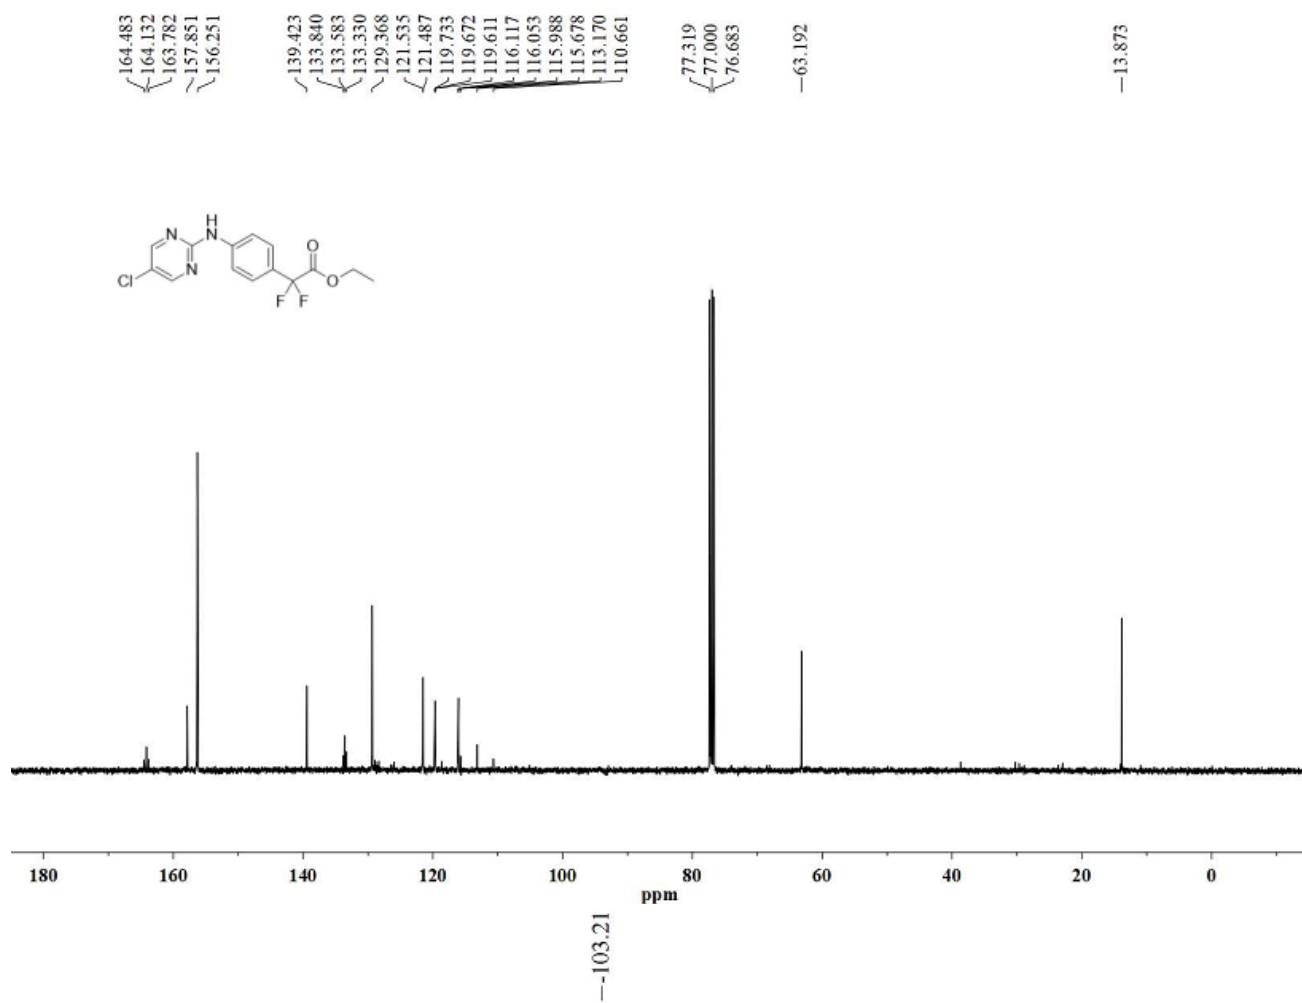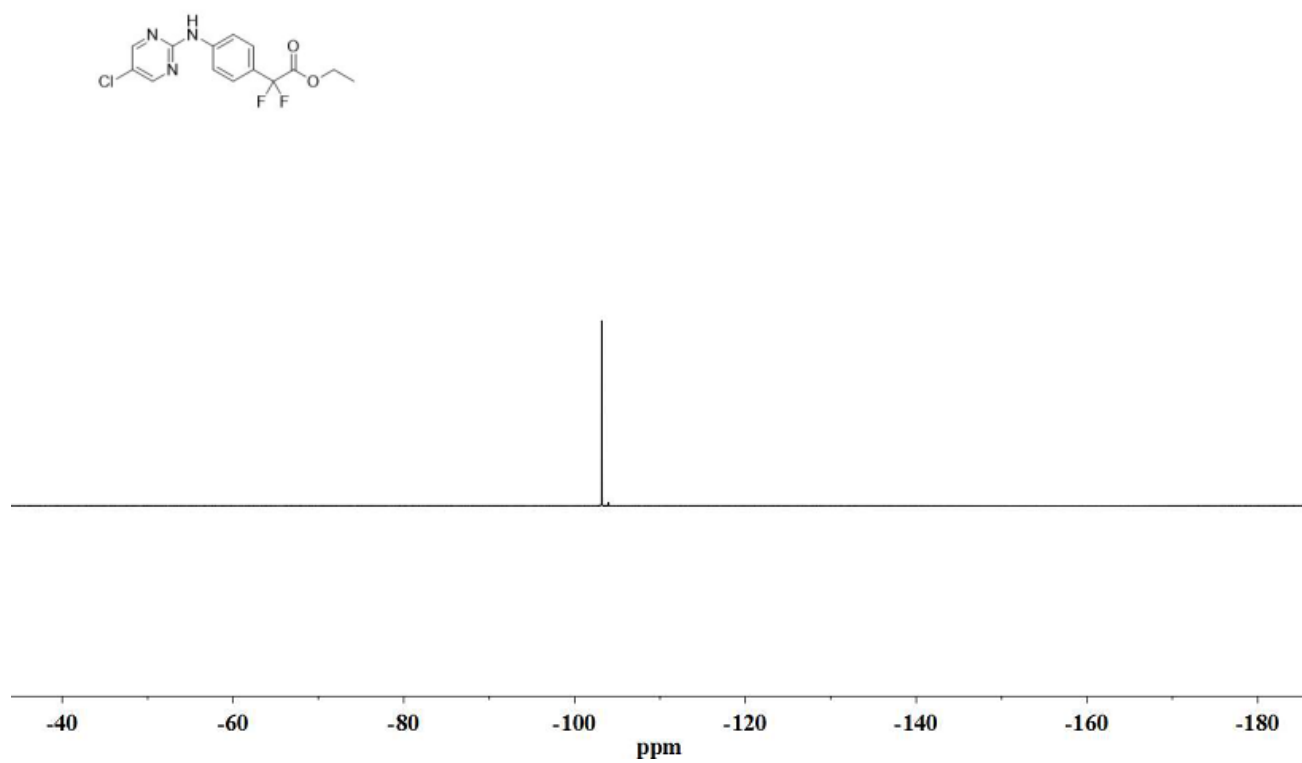

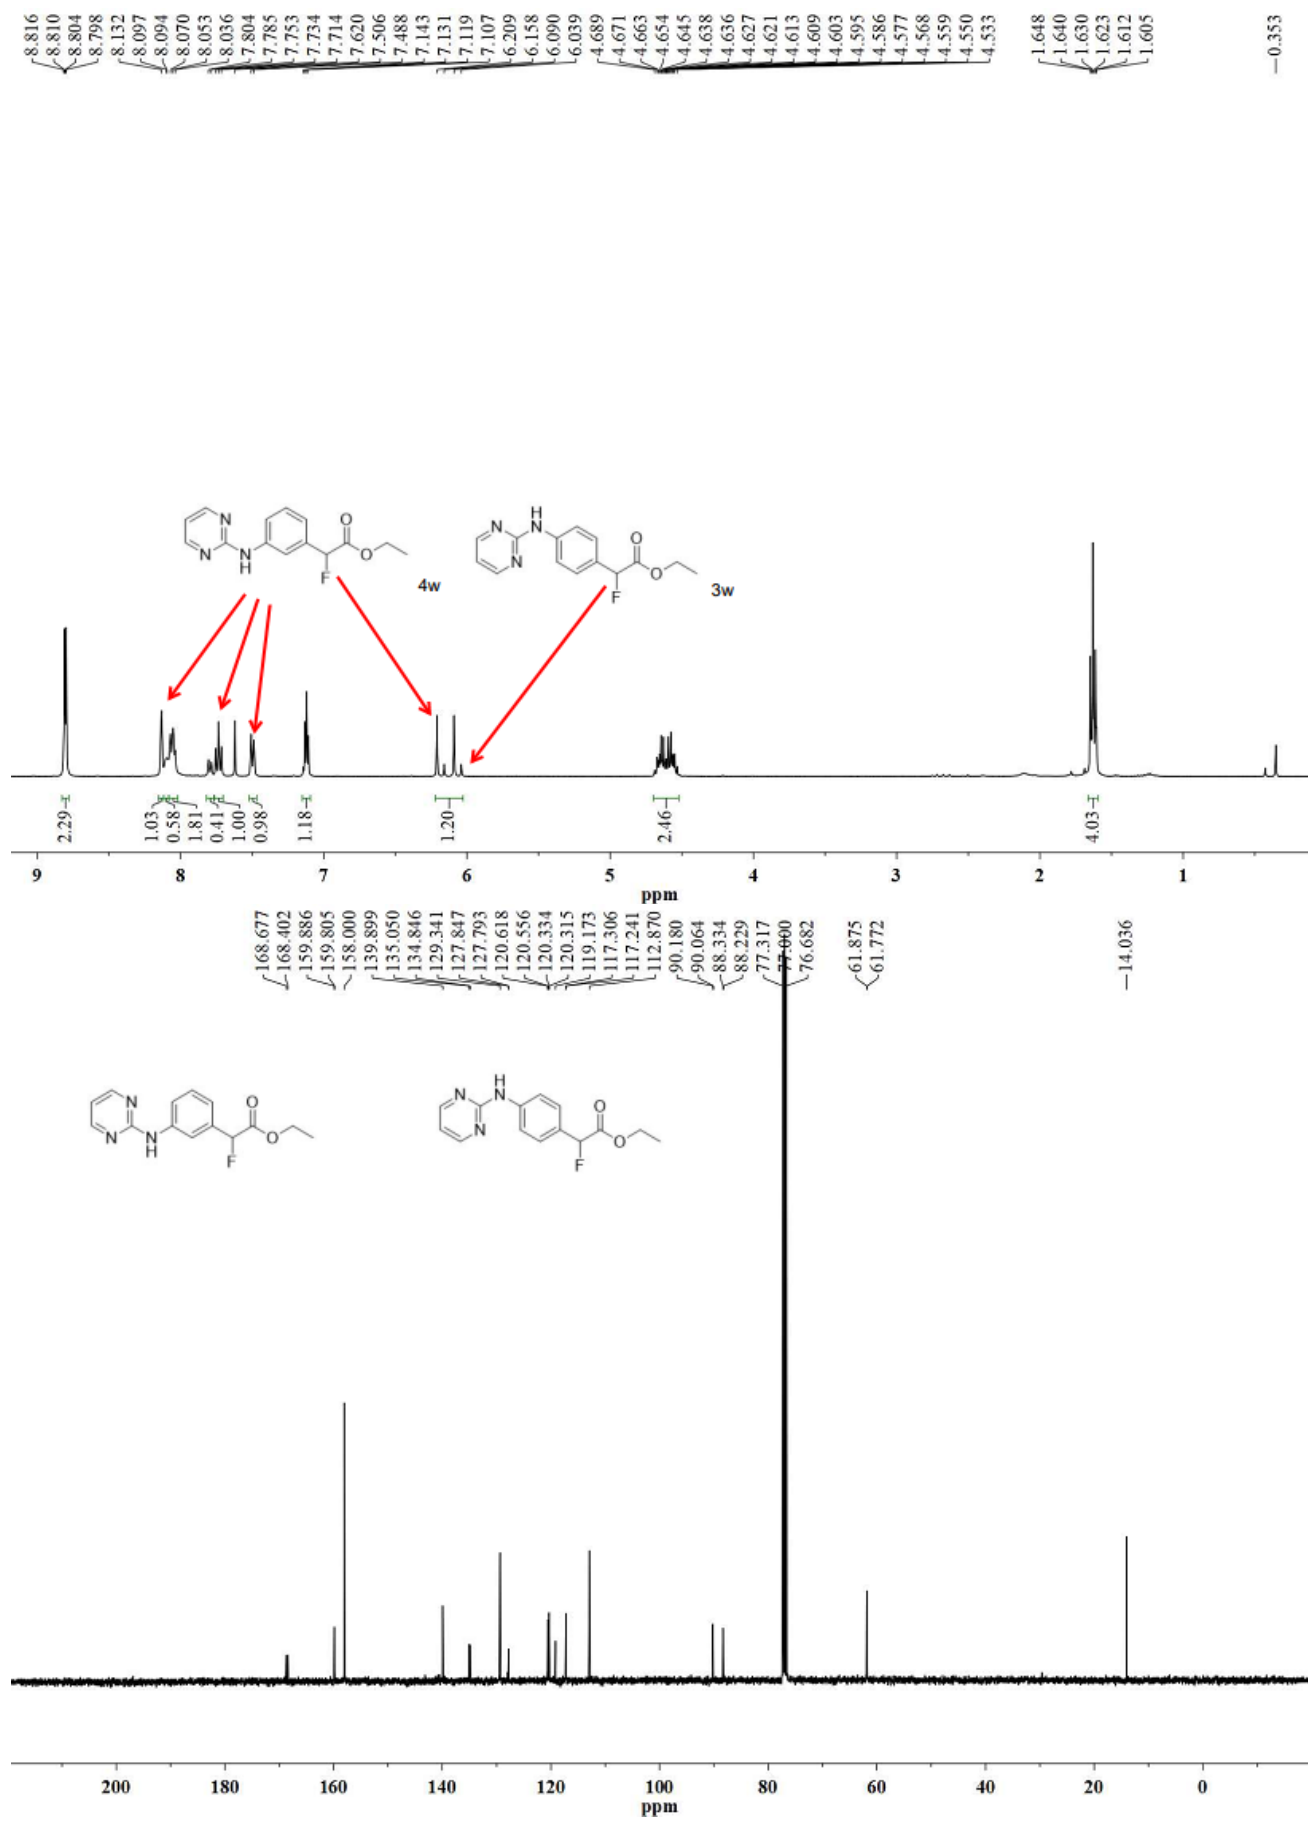

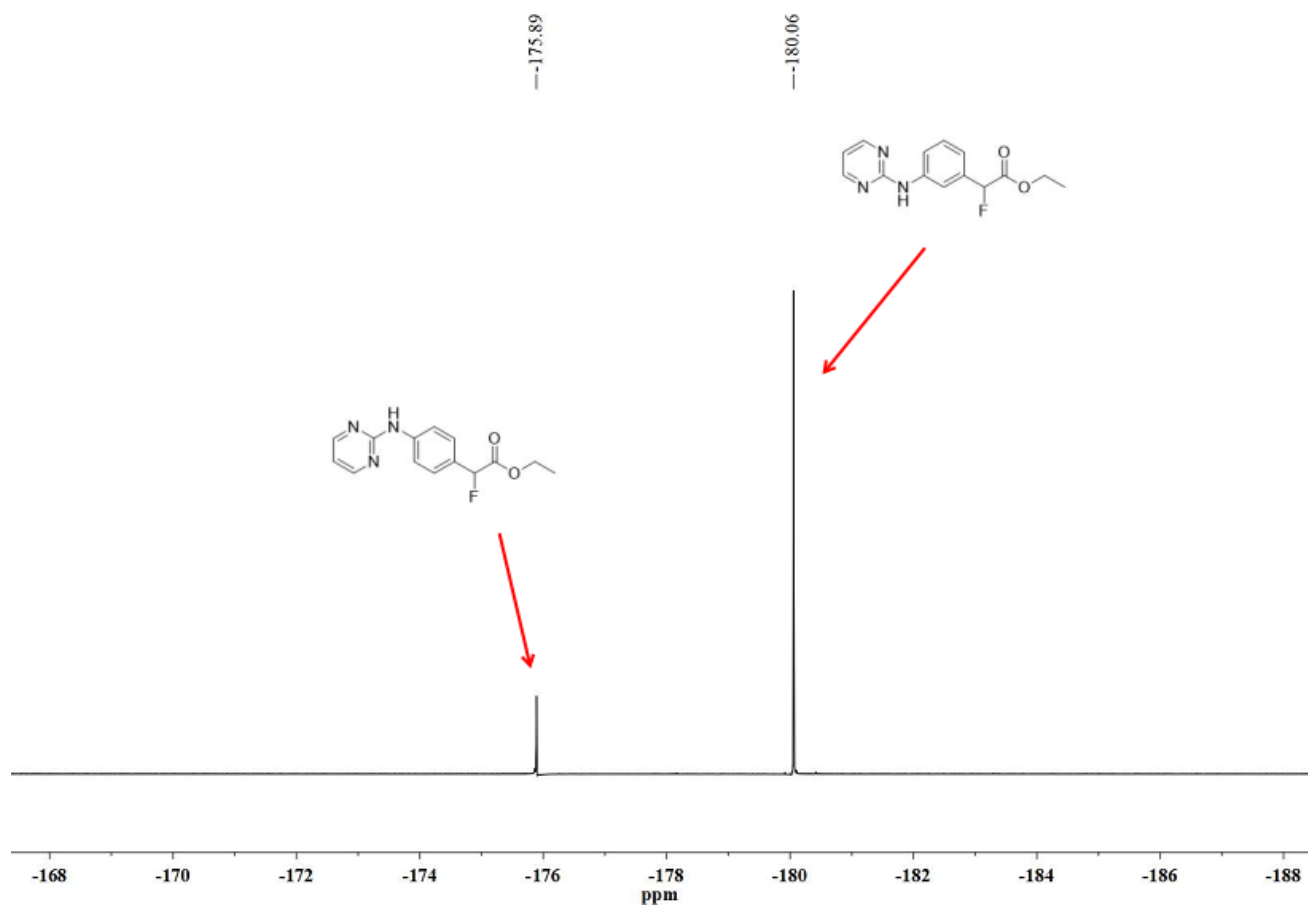

8.471  
8.459  
8.446  
8.434  
8.015  
7.990  
7.887  
7.850  
7.829  
7.753  
7.731  
7.586  
7.564  
7.448  
7.428  
7.408  
7.282  
7.265  
6.816  
6.804  
6.796  
6.784  
6.772

3.860  
3.849

-0.000

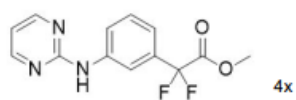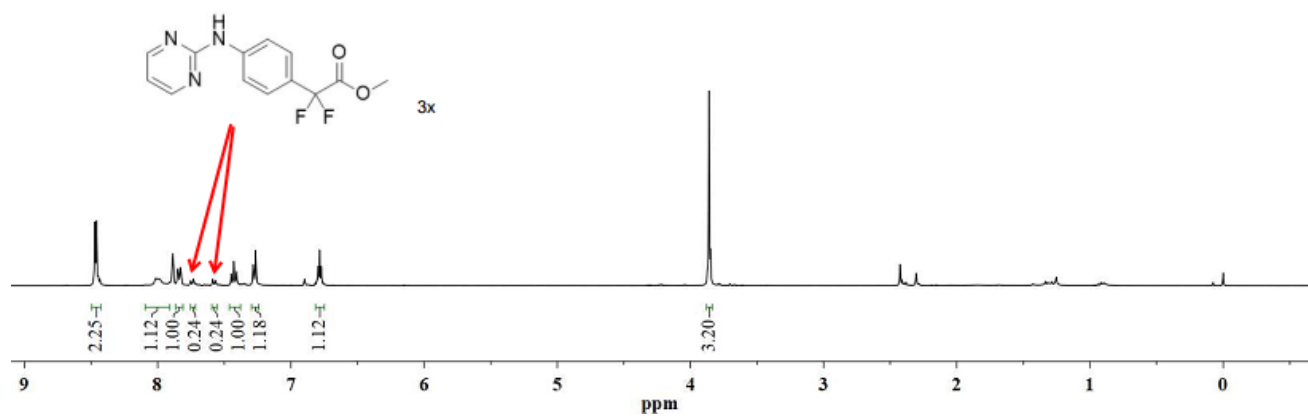

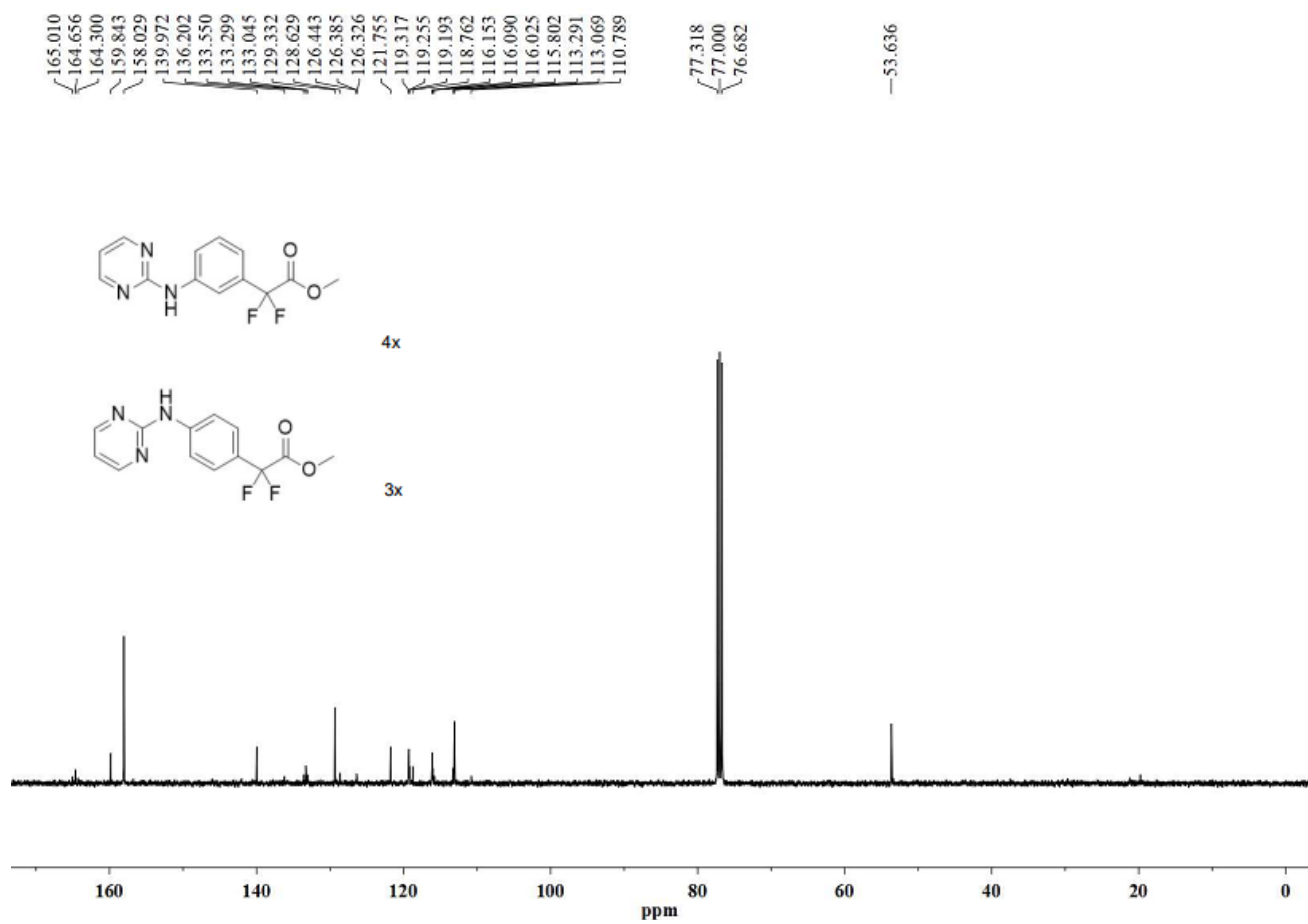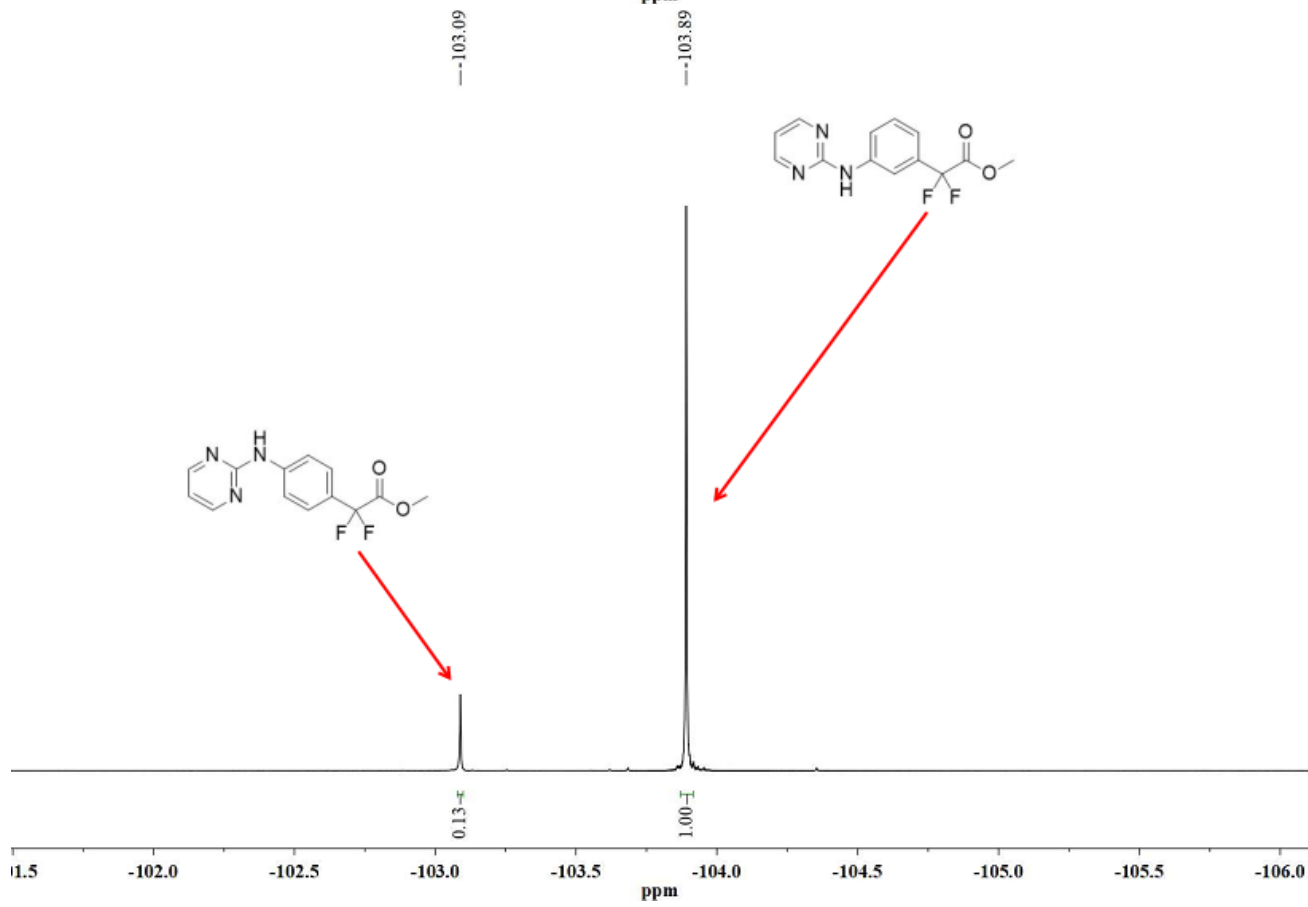

8.460  
8.448  
7.736  
7.714  
7.572  
7.550  
7.423  
6.799  
6.787  
6.775  
-6.250

-1.398

-0.005

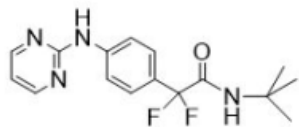

3y

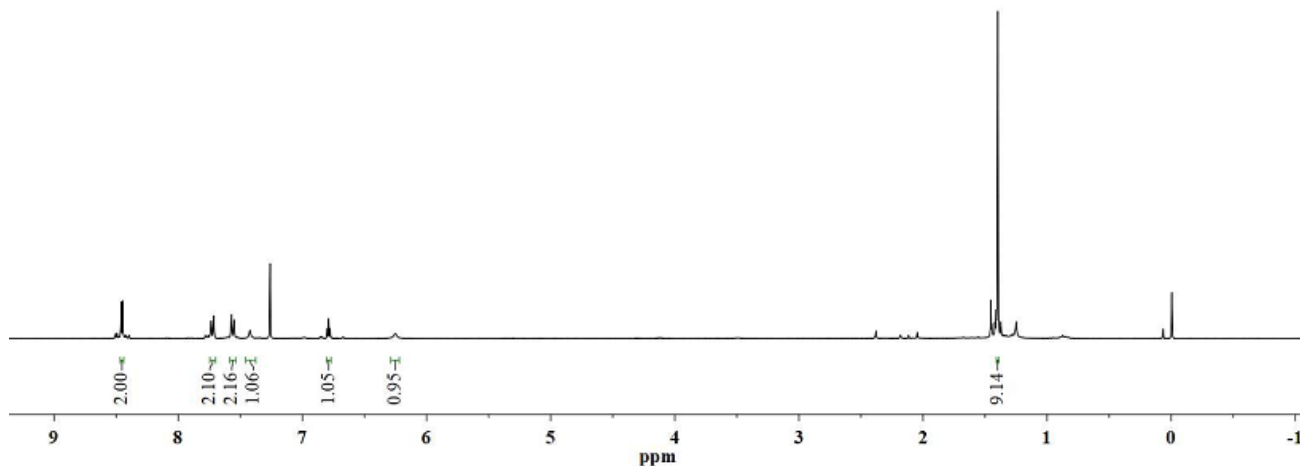

8.452  
8.439  
7.904  
7.879  
7.789  
7.769  
7.424  
7.404  
7.385  
7.260  
7.244  
6.776  
6.764  
6.752  
6.306

-0.009

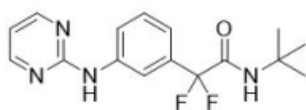

4y

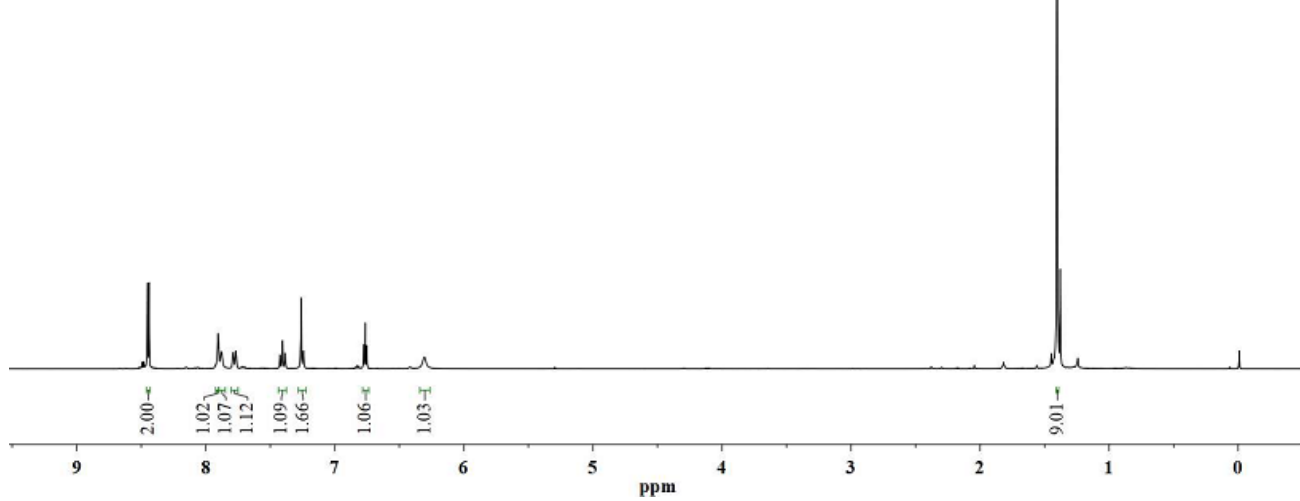

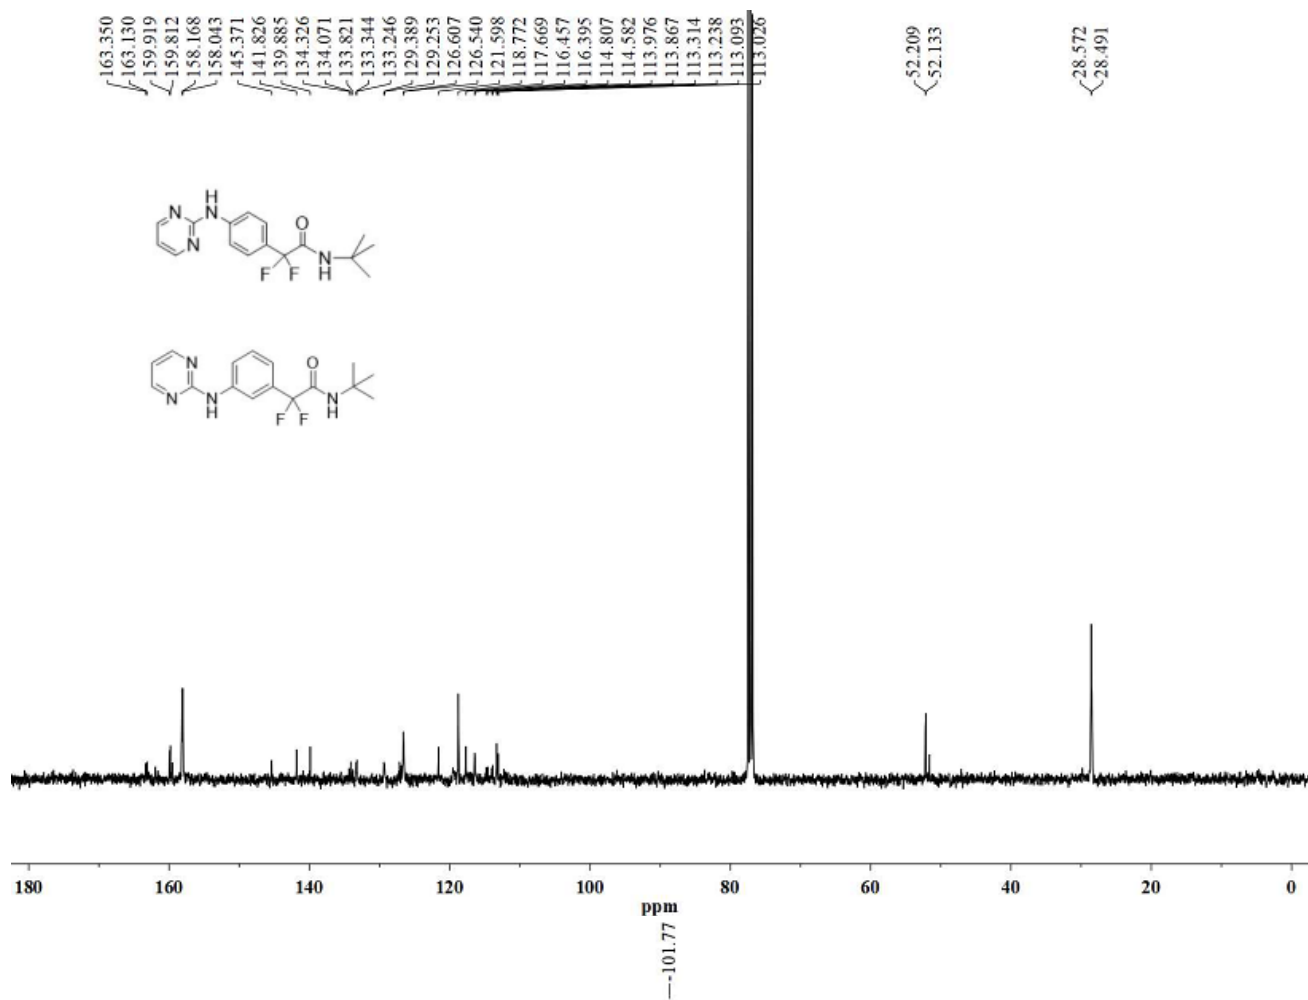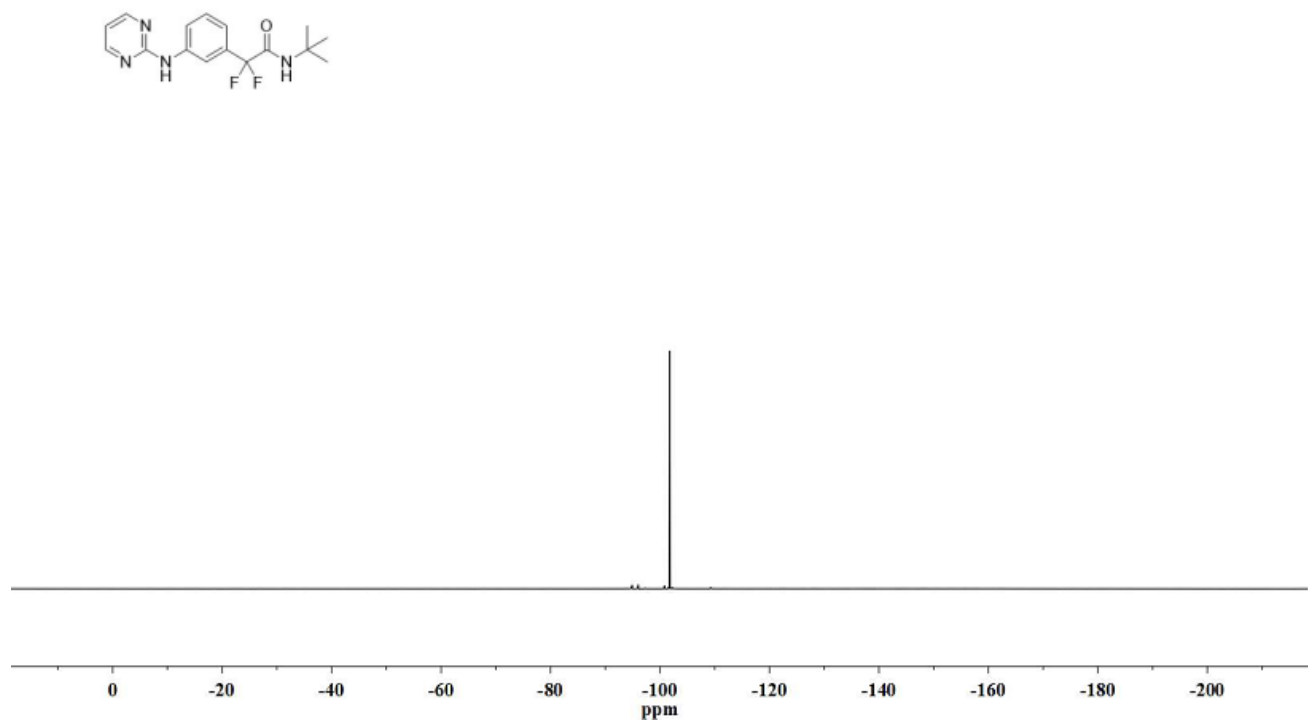

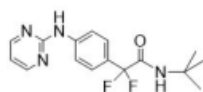

---100.81

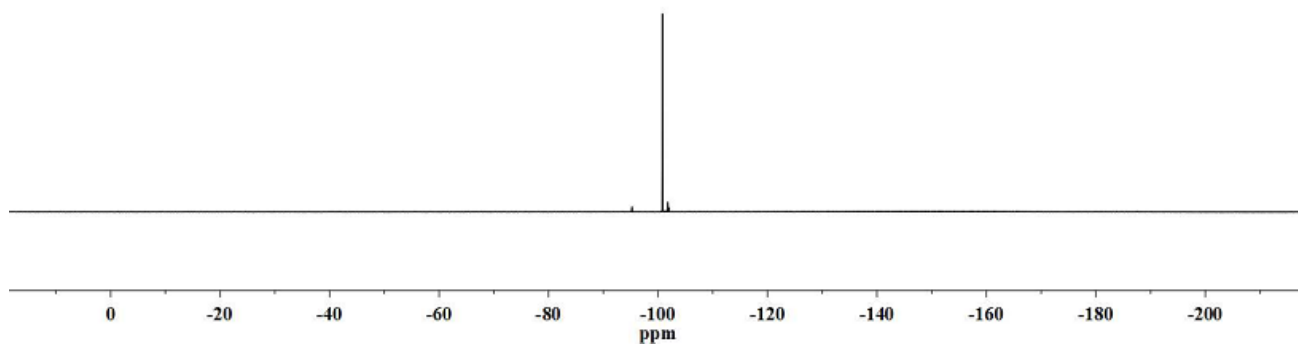

8.936  
8.925  
8.919  
8.896  
8.891  
8.886  
8.234  
8.080  
8.058  
7.816  
7.811  
7.794  
7.790  
7.287  
7.071  
7.061  
7.054  
7.044

4.343  
4.325  
4.307  
4.289

1.331  
1.313  
1.295

---0.000

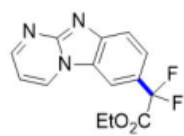

6

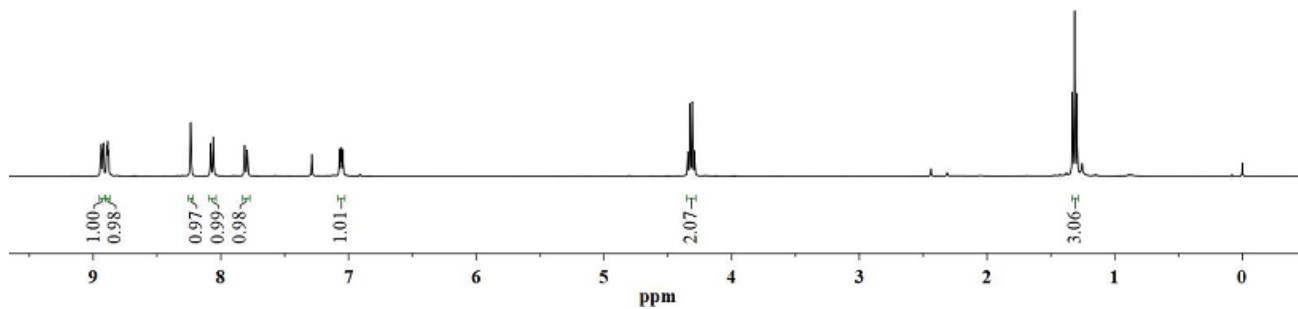

1.00  
0.98

0.97  
0.99  
0.98

1.01

2.07

3.06



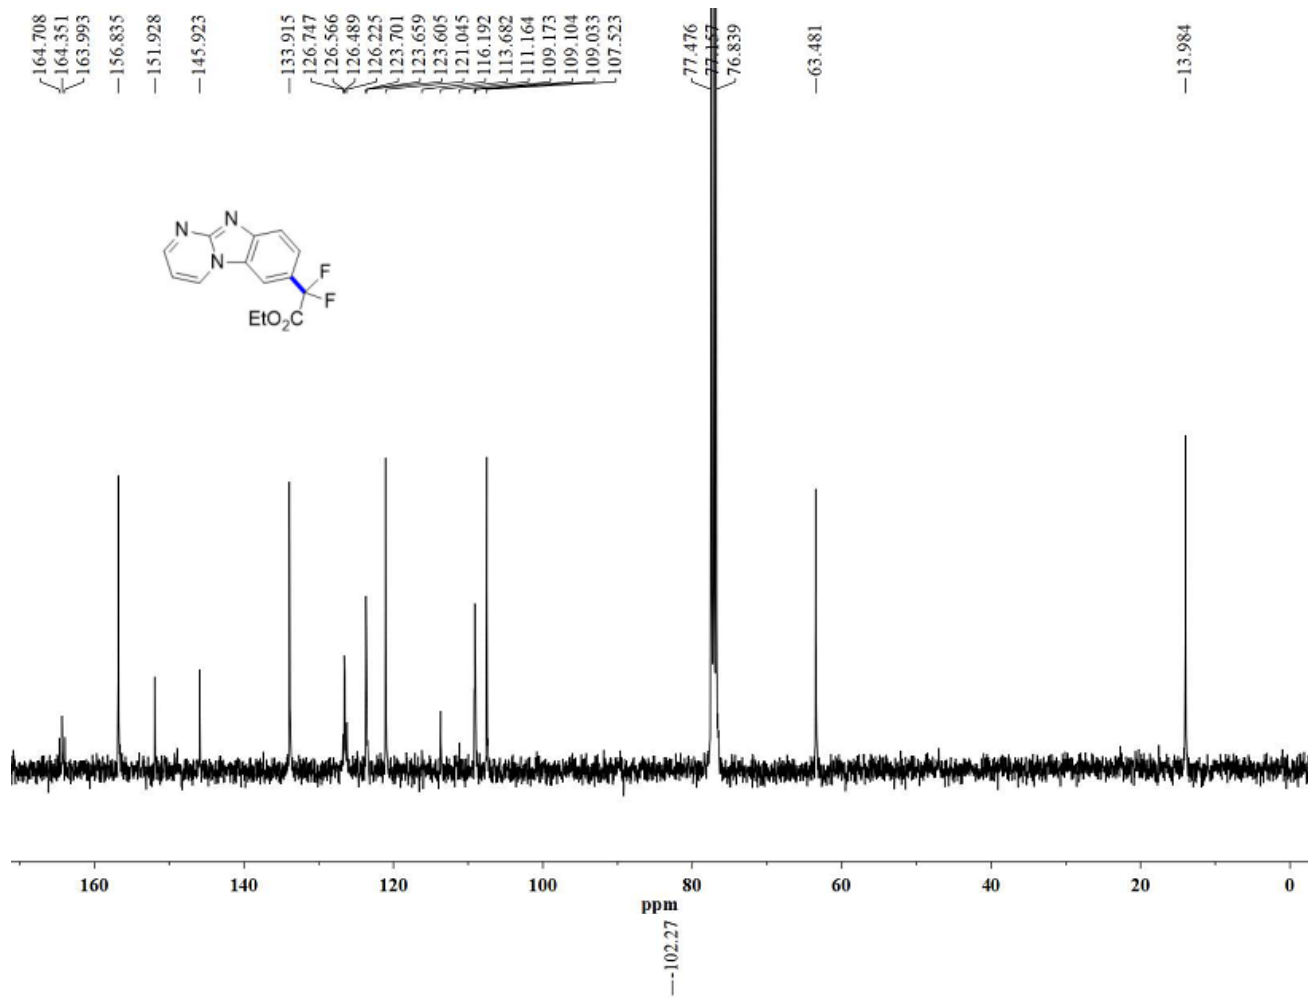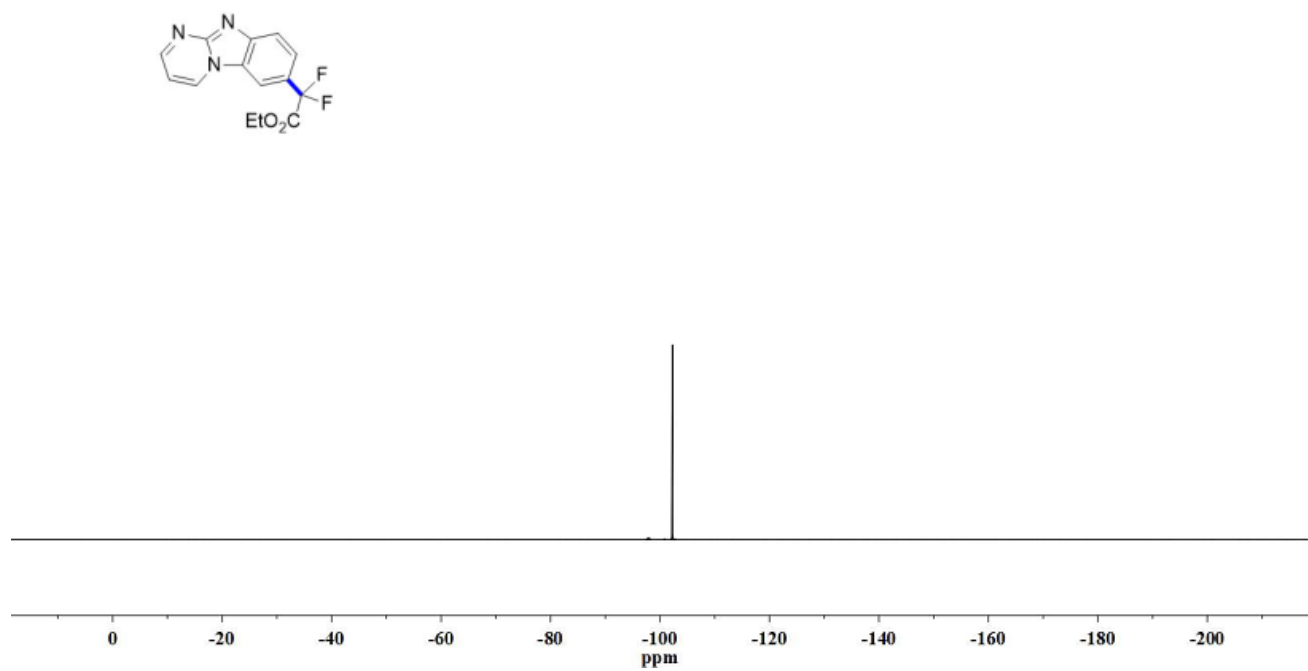

9.943  
9.939

8.554  
8.542  
8.178  
8.173  
7.762  
7.757  
7.741  
7.735  
7.484  
7.462  
6.937  
6.925  
6.913

2.525  
2.522  
2.517  
2.513  
2.508  
2.503

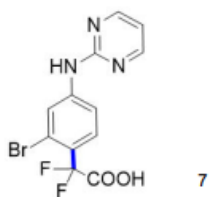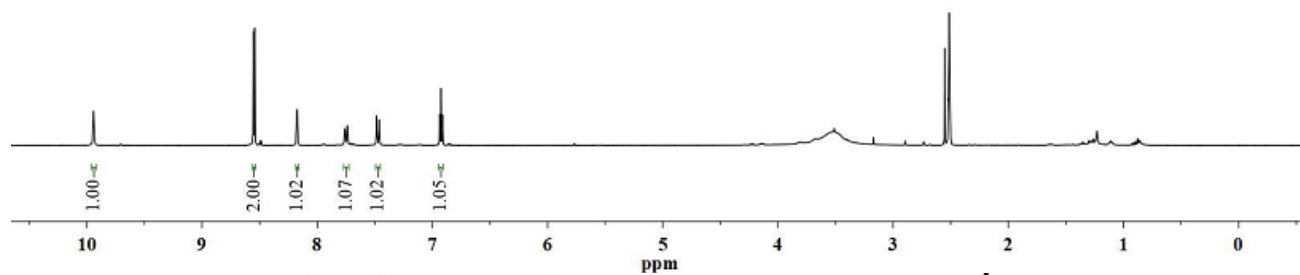

159.779  
159.693  
159.604  
158.249

142.264  
129.341  
129.084  
128.260  
128.179  
128.095  
122.767  
119.745  
119.710  
119.675  
117.120  
116.459  
115.558  
114.125  
113.328

40.227  
40.018  
39.811  
39.600  
39.392  
39.183  
38.975

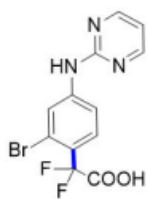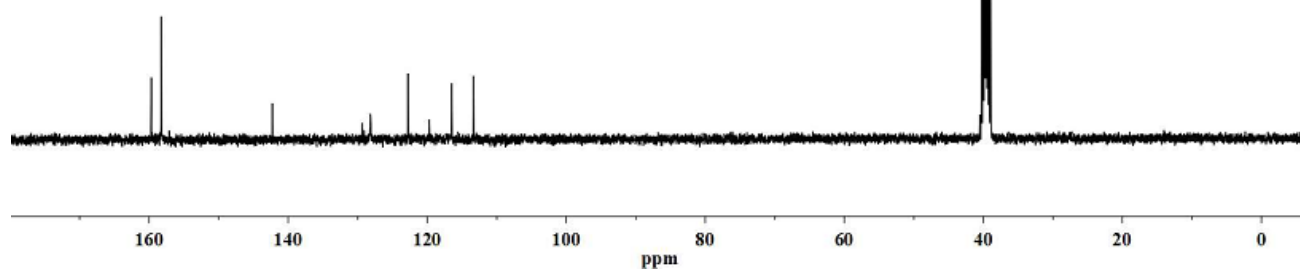

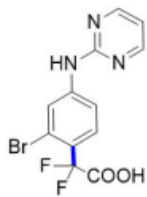

—96.36

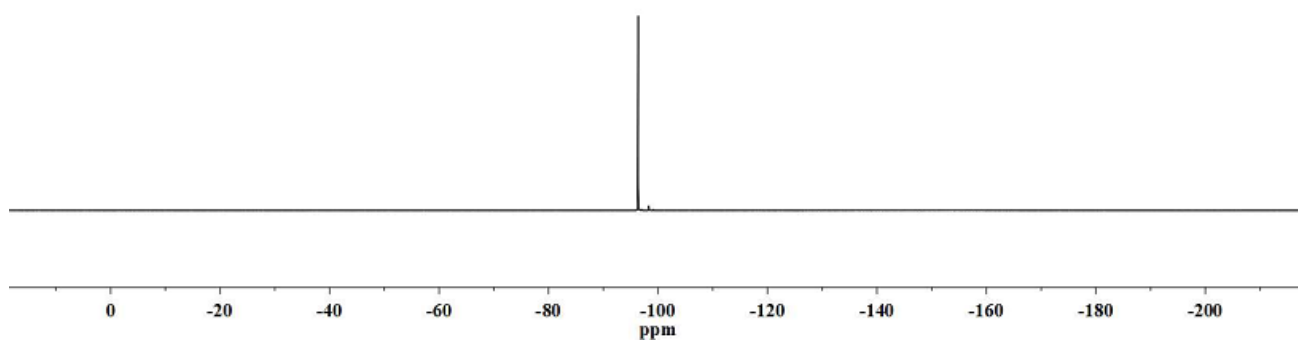

7.261, 7.230, 7.211, 7.190, 7.184, 7.173, 7.168, 7.155, 7.149, 7.141, 7.137, 7.122, 7.119, 7.107, 7.102, 7.088, 6.067, 6.055, 6.044, 4.138, 4.121, 4.103, 4.085, 3.259, 3.219, 3.179, 2.733, 2.713, 2.693, 2.272, 2.261, 2.252, 2.240, 2.232, 2.220, 1.202, 1.184, 1.166, —0.010

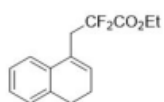

14

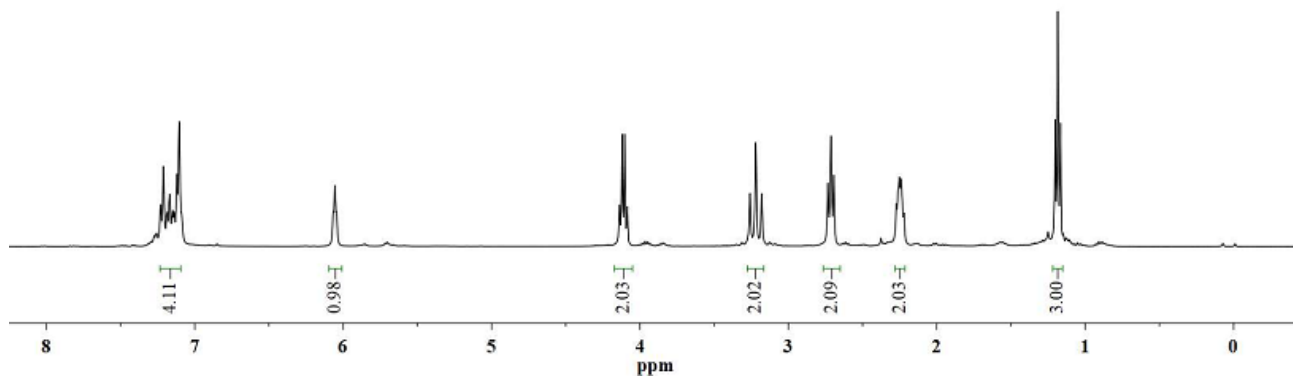

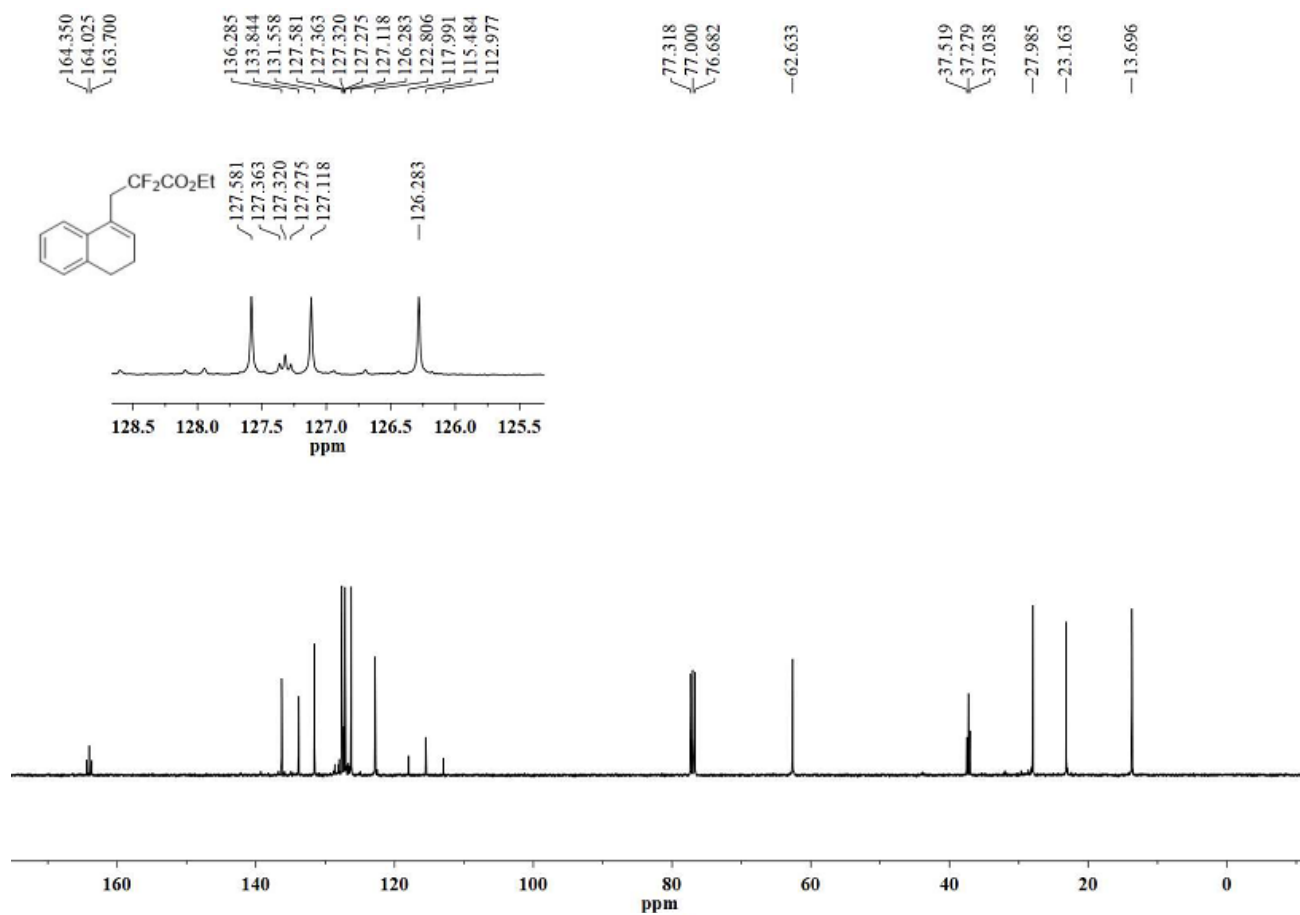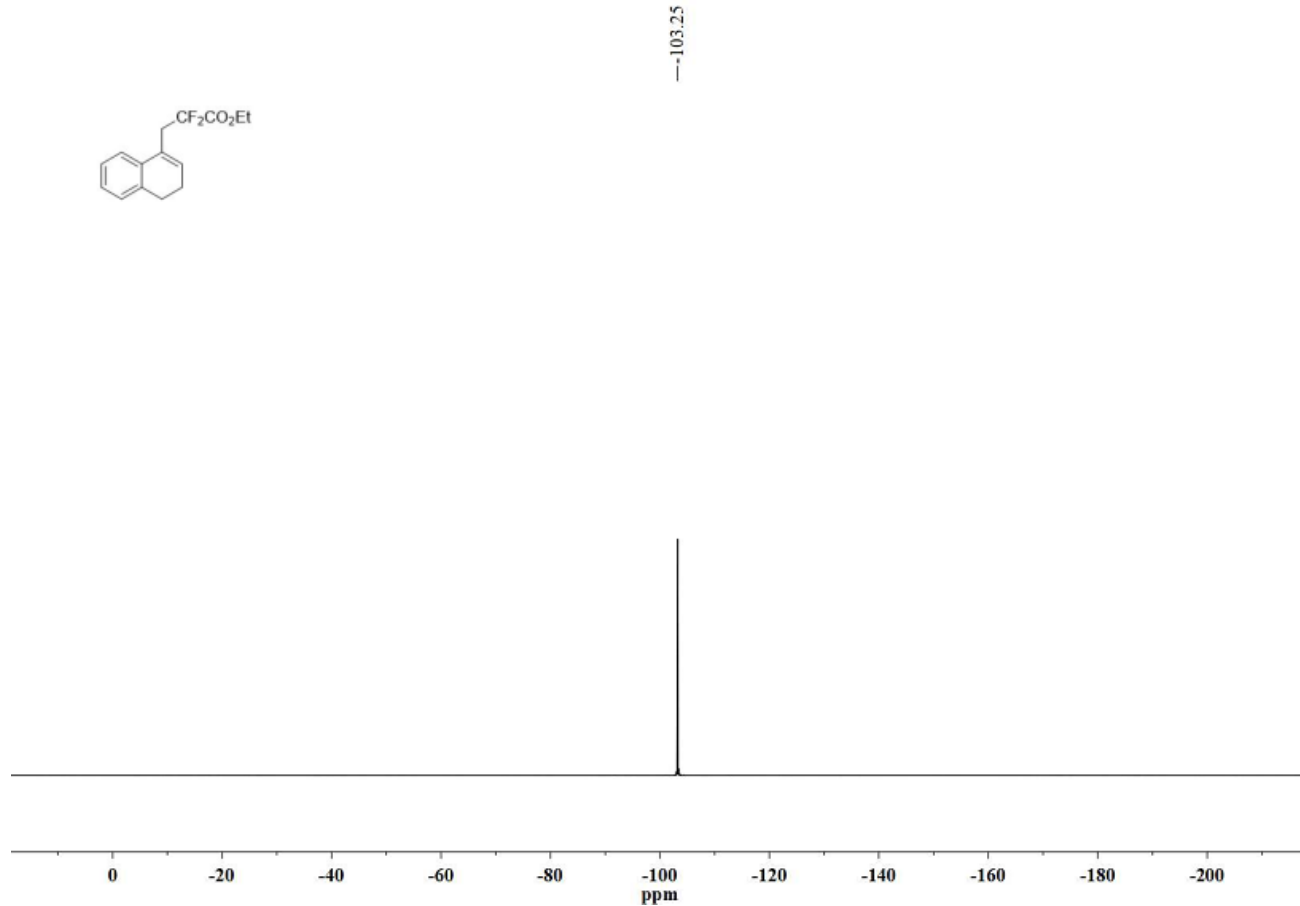

## References

1. (a) J. Li, S. Warratz, D. Zell, S. De Sarkar, E. E. Ishikawa and L. Ackermann, *J. Am. Chem. Soc.*, 2015, DOI: 10.1021/jacs.5b08435; (b) J. A. Leitch, C. L. McMullin, A. J. Paterson, M. F. Mahon, Y. Bhonoah and C. G. Frost, *Angew. Chem. Int. Ed.*, 2017, **56**, 15131-15135.
2. A. Prieto, R. Melot, D. Bouyssi and N. Monteiro, *ACS Catal.*, 2016, **6**, 1093-1096.
3. W. Xuesong, R. Jan and D. V. M., *Angew. Chem. Int. Ed.*, 2017, **56**, 11589-11593.
4. L. Ackermann, R. Vicente, H. K. Potukuchi and V. Pirovano, *Org. Lett.*, 2010, **12**, 5032-5035.
5. J. Zhang, R. Shrestha, J. F. Hartwig and P. Zhao, *Nat. Chem.*, 2016, **8**, 1144.
6. N. Xingliang, C. Cungui and Z. Gangguo, *Angew. Chem. Int. Ed.*, 2017, **56**, 1898-1902.
7. Gaussian 09, Revision D.01, M. J. Frisch, G. W. Trucks, H. B. Schlegel, G. E. Scuseria, M. A. Robb, J. R. Cheeseman, G. Scalmani, V. Barone, G. A. Petersson, H. Nakatsuji, X. Li, M. Caricato, A. Marenich, J. Bloino, B. G. Janesko, R. Gomperts, B. Mennucci, H. P. Hratchian, J. V. Ortiz, A. F. Izmaylov, J. L. Sonnenberg, D. Williams-Young, F. Ding, F. Lipparini, F. Egidi, J. Goings, B. Peng, A. Petrone, T. Henderson, D. Ranasinghe, V. G. Zakrzewski, J. Gao, N. Rega, G. Zheng, W. Liang, M. Hada, M. Ehara, K. Toyota, R. Fukuda, J. Hasegawa, M. Ishida, T. Nakajima, Y. Honda, O. Kitao, H. Nakai, T. Vreven, K. Throssell, J. A. Montgomery, Jr., J. E. Peralta, F. Ogliaro, M. Bearpark, J. J. Heyd, E. Brothers, K. N. Kudin, V. N. Staroverov, T. Keith, R. Kobayashi, J. Normand, K. Raghavachari, A. Rendell, J. C. Burant, S. S. Iyengar, J. Tomasi, M. Cossi, J. M. Millam, M. Klene, C. Adamo, R. Cammi, J. W. Ochterski, R. L. Martin, K. Morokuma, O. Farkas, J. B. Foresman, and D. J. Fox, Gaussian, Inc., Wallingford CT, 2016.
